# Supplementary material
Source: publisher figshare collection journal article supplement (https://acs.figshare.com/ndownloader/files/4531222)

# Exploring Symmetry-Based Logic for a Synthesis of Palau'amine

*Qingyi Li, Paul Hurley, Hui Ding, Andrew G. Roberts, Radha Akella and Patrick G. Harran\**

Department of Chemistry and Biochemistry  
University of California Los Angeles  
607 Charles E. Young Drive East  
Los Angeles, CA 90095-1569

And

Department of Biochemistry  
University of Texas Southwestern Medical Center at Dallas  
5323 Harry Hines Blvd  
Dallas, Texas 75390-9038

## SUPPORTING INFORMATION

**Experimental**----- 2-25

**NMR spectra**----- 26-93

## Experimental

Unless stated otherwise, reactions were performed under an argon atmosphere in flame-dried glassware. Tetrahydrofuran (THF), dichloromethane ( $\text{CH}_2\text{Cl}_2$ ), diethyl ether ( $\text{Et}_2\text{O}$ ), toluene ( $\text{C}_7\text{H}_8$ ), benzene ( $\text{C}_6\text{H}_6$ ) and acetonitrile ( $\text{CH}_3\text{CN}$ ) were passed through Glass Contour solvent drying systems prior to use. Chemical reagents were obtained from commercial sources and used without further purification. Column chromatography was performed on silica gel 60 (240-400 mesh). Thin layer chromatography and preparative layer chromatography utilized pre-coated plates (silica gel 60 PF254, 0.25mm or 0.5mm).

### *o*-Xylylene diamine (B)

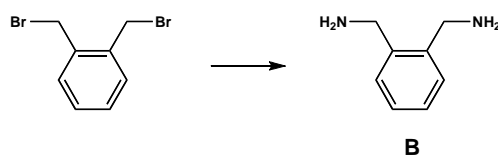

To a solution of *o*-xylylene dibromide (100 g, 378 mmol) in THF (1.3 L), EtOH (1 L) and  $\text{H}_2\text{O}$  (0.33 L) was added  $\text{NaN}_3$  (53.7 g, 826 mmol) in  $\text{H}_2\text{O}$  (0.33 L). The solution was heated at reflux for 1 h. After cooling to rt,  $\text{PPh}_3$  (248 g, 947 mmol) was added in small portions. When the evolution of  $\text{N}_2$  (g) ceased, the solution was heated at reflux for 2h. Upon cooling to rt and standing overnight, needle shaped crystals had formed, which partially dissolved with the addition of 100 mL  $\text{H}_2\text{O}$ . Solid NaOH was added to the aqueous solution until a pink oily layer appeared. The organic layer was separated and the aqueous layer was extracted with  $\text{Et}_2\text{O}$  ( $2 \times 50$  mL). The combined organic layers were dried over  $\text{Na}_2\text{SO}_4$ , filtered and concentrated *in vacuo*. The slightly pink oil obtained was used without further purification.

### 2, 5-Dihydro-3-(methylthio)-1*H*-2,4-benzodiazepine hydroiodide (9)

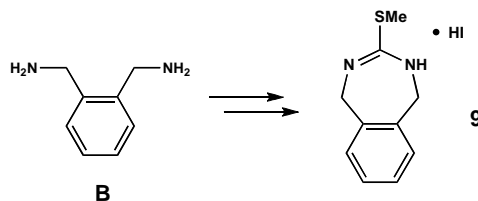

These procedures were carried out as described in Elslager, E.; Worth, D. F.; Haley, N. F.; Perricone, S. C. *J. Heterocycl. Chem.* **1968**, 5, 609-613.

### Methyl 5-bromo-2-oxopentanoate (**7**)

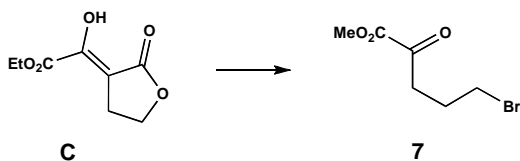

A solution of lactone **C** (46.6 g, 249 mmol – prepared according to Cushman, M.; Gerhardt, S.; Huber, R.; Fischer, M.; Kis, K.; and Bacher, A. *J. Org. Chem.* **2002**, 67, 5807–5816. Note: the EtOH used was freshly distilled from Mg turnings) in 30% HBr/AcOH (150 mL) was heated at 110°C for 2h. An additional 100 mL of 30% HBr/HOAc was added and the reaction maintained at 110°C for 14h. The mixture was concentrated *in vacuo* to afford a brown oil that was dissolved in 250 mL MeOH. Concentrated aqueous H<sub>2</sub>SO<sub>4</sub> (0.5 mL) was added and the solution stirred at rt for 14h. The reaction was concentrated and the incipient residue dissolved in Et<sub>2</sub>O. Saturated aqueous NaHCO<sub>3</sub> was carefully added until gas evolution ceased. The organic layer was separated and washed with H<sub>2</sub>O and dried over Na<sub>2</sub>SO<sub>4</sub>. Concentration *in vacuo* provided a brown oil that was used without further purification.

### Methyl-1,4,5,6-tetrahydro-3-pyridazinecarboxylate (**D**)

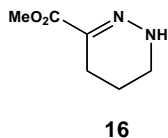

Hydrazine hydrate (20.4 g, 398 mmol) was dissolved in a mixture of MeOH (300 mL) and water (37.5 mL). Glacial AcOH (7 mL) was added and the solution cooled in an ice-bath. A solution of crude **7** in MeOH (50 mL) was added over 30 min wherein a white precipitate formed. The ice-bath was removed wherein the solids dissolved. The pH of the mixture was maintained between 4 and 7 with 3M aq K<sub>2</sub>CO<sub>3</sub>. After the pH had stabilized at rt, the reaction was immersed into an oil-bath pre-heated to 60 °C and 3M aq K<sub>2</sub>CO<sub>3</sub> was used to adjust the pH to ~5. The reaction was heated at 60 °C for 1 h at which time the pH was 6. After removing MeOH *in vacuo*, the residue was dissolved in a minimum amount of water and extracted with EtOAc. The organic layer was dried over Na<sub>2</sub>SO<sub>4</sub>, filtered and concentrated to afford a solid that was recrystallized from EtOAc to afford **16** (42.5 g, 81%).

**16**: colorless crystals [m.p. 72 °C]; *R*<sub>f</sub> = 0.5 (2:3 EtOAc/CH<sub>2</sub>Cl<sub>2</sub>); IR (film): 3200, 2957, 1694, 1588, 1442, 1303, 1237, 1190, 115, 972, 743 cm<sup>-1</sup>; <sup>1</sup>H NMR (400 MHz, CDCl<sub>3</sub>): δ 5.1-5.9 (bs, 1H), 3.78 (s, 3H), 3.23 (t, 2H, *J* = 5.2 Hz), 2.45 (t, 2H, *J* = 6.8 Hz), 2.02-1.82 (m, 2H); <sup>13</sup>C NMR (75 MHz, CDCl<sub>3</sub>): δ 165.8, 132.0, 52.1, 41.9, 21.2, 17.6. MS (positive electrospray) calcd for (C<sub>6</sub>H<sub>10</sub>N<sub>2</sub>O<sub>2</sub>+H)<sup>+</sup>: 143.07; found: 143.06.

### Methyl-1-allyl-1,4,5,6-tetrahydro-3-pyridazinecarboxylate (**E**)

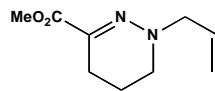

**E**

A solution of **16** (5.2 g, 35.9 mmol) in THF (180 mL) was cooled to  $-30\text{ }^{\circ}\text{C}$ . KHMDS (0.5 M in toluene, 73.3 mL) was added over 5 min. The reaction was stirred for 10 min before adding allyl bromide (3.8 mL, 43.2 mmol). The reaction was stirred at  $-25\text{ }^{\circ}\text{C}$  for 1h, quenched with MeOH, warmed to rt, and filtered through a pad of Celite. Concentration *in vacuo* followed by flash chromatography on silica gel (3:7 EtOAc/hexanes) afforded **E** (5.88 g, 90%) as colorless solid.

**E**:  $R_f$  = 0.5 (1:1 EtOAc/Hexanes); IR (film): 3079, 2925, 2844, 1700, 1562, 1439, 1261, 1108, 983, 744  $\text{cm}^{-1}$ ;  $^1\text{H}$  NMR (400 MHz,  $\text{CDCl}_3$ ):  $\delta$  5.88-5.80 (m, 1H), 5.21 (tdd, 2H,  $J$  = 6.2, 10.1, 16.5 Hz), 4.01-3.95 (m, 2H), 3.78 (s, 3H), 3.08-3.02 (m, 2H), 2.39 (t, 2H,  $J$  = 6.7 Hz), 1.98-1.83 (m, 2H);  $^{13}\text{C}$  NMR (322 MHz,  $\text{CDCl}_3$ ):  $\delta$  165.4, 133.5, 129.5, 118.1, 61.3, 51.7, 44.6, 20.3, 17.6. MS (positive electrospray) calcd for  $(\text{C}_9\text{H}_{14}\text{N}_2\text{O}_2 + \text{H})^+$ : 183.11; found: 183.11.

### 1-Allyl-1,4,5,6-tetrahydro-3-pyridazinecarboxylic acid (**8**)

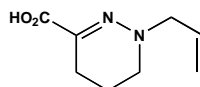

**8**

Solid LiOH (0.78 g, 32.7 mmol) was added to a solution of ester **E** (5.4 g, 29.7 mmol) in THF/MeOH/ $\text{H}_2\text{O}$  (40 mL/15 mL/20 mL). The resultant solution was stirred at rt for 3h and then neutralized with 10% aq citric acid. The solvents were removed *in vacuo* and the residue dissolved in EtOAc. The solution was washed with  $\text{H}_2\text{O}$  and brine, dried over  $\text{Na}_2\text{SO}_4$ , filtered and concentrated. The crude acid was pure by  $^1\text{H}$  NMR and was used in the next step without purification.

### Heterocycle 11

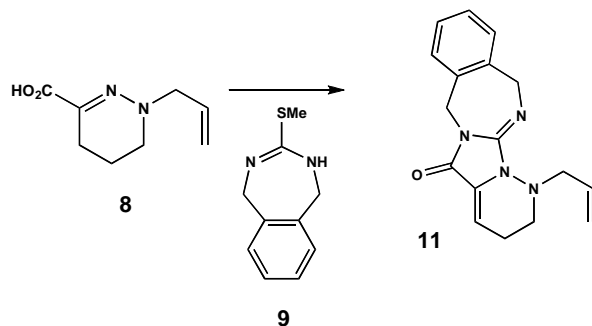

TBTU (0.27 g, 0.84 mmol) was added to a portion of crude **8** (0.14 g, 0.94 mmol) and **9** (0.3 g, 0.94 mmol) in DMF (4.5 mL). *i*-Pr<sub>2</sub>NEt (0.44 mL, 2.51 mmol) was added and the resultant yellow solution stirred at rt for 2 h. The mixture was placed under house vacuum and heated at 70°C overnight. The residue was dissolved in 20 mL EtOAc and washed with saturated NaHCO<sub>3</sub>, water and brine. The organic layer was dried over Na<sub>2</sub>SO<sub>4</sub>, filtered and concentrated *in vacuo*. Purification by silica gel chromatography (4:1 EtOAc/hexanes) provided **11** (0.173 g, 71%) as a light brown solid.

**11**: *R*<sub>f</sub> = 0.45 (2:3 EtOAc/CH<sub>2</sub>Cl<sub>2</sub>); IR (film): 3411, 2947, 1734, 1620, 1451, 1409, 1180, 1013, 761, 667 cm<sup>-1</sup>; <sup>1</sup>H NMR (500 MHz, DMSO-*d*<sub>6</sub>): δ 7.40-7.25 (m, 4H), 5.87 (tdd, 1H, *J* = 6.7, 10.2, 17 Hz), 5.7 (t, 1H, *J* = 4.6 Hz), 5.20 (d, 1H, *J* = 17.2 Hz), 5.11 (d, 1H, *J* = 10.1 Hz), 4.94, (s, 2H), 4.65 (s, 2H), 3.33 (d, 2H, *J* = 6.6 Hz), 2.92 (t, 2H, *J* = 5.5 Hz), 2.21 (dd, 2H, *J* = 5.3, 10.3 Hz); <sup>13</sup>C NMR (125 MHz, DMSO-*d*<sub>6</sub>): δ 158.8, 141.0, 140.1, 134.2, 133.6, 128.3, 128.0, 127.9, 127.5, 127.1, 118.7, 101.7, 56.0, 48.2, 44.8, 42.2, 16.2. HRMS (ESI-TOF) calcd for (C<sub>17</sub>H<sub>18</sub>N<sub>4</sub>O+H)<sup>+</sup>: 295.1553; found: 295.1565.

### Regioisomeric dimerization products **12**, **13** and **14**

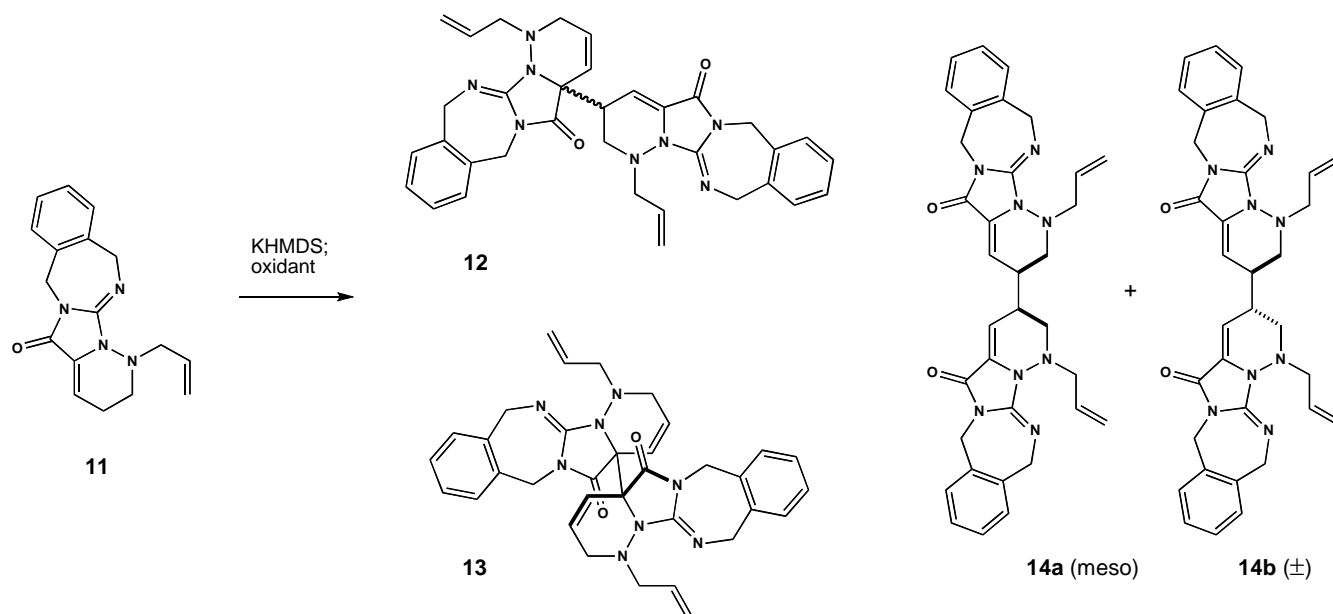

### Procedure A: I<sub>2</sub> as oxidant

The THF used in this reaction was degassed via the freeze-pump-thaw method prior to use. Monomer **11** (1.03 g, 3.51 mmol) was dissolved in THF (10 mL) and cooled to  $-78^{\circ}\text{C}$ . This solution was added via cannulating needle to a flask containing KHMDS (7.38 mL, 0.5M in toluene) at  $-78^{\circ}\text{C}$  and the resulting dark red mixture was stirred at  $-78^{\circ}\text{C}$  for 30 minutes. A solution of I<sub>2</sub> (0.445 g, 1.76 mmol) in THF (0.5 mL) was then added and the reaction was stirred at  $-78^{\circ}\text{C}$  for 3 h. The solvent was removed *in vacuo* and the residue purified by silica gel chromatography (4:1 EtOAc/hexanes) to afford 485 mg (47%) of  $\alpha,\alpha$  dimer **13** and 250 mg (24%) of  $\alpha,\gamma$  dimers **12**.

**13**: light pink solid;  $R_f = 0.75$  (EtOAc); IR (film): 3412, 1743, 1671, 1394, 1371, 1287, 1154, 1064, 968, 741, 667  $\text{cm}^{-1}$ ;  $^1\text{H}$  NMR (500 MHz, DMSO- $d_6$ )  $\delta$  7.42-7.18 (m, 8H), 5.97 (dd, 2H,  $J = 4.0, 9.9$  Hz), 5.79 (d, 2H,  $J = 9.9$  Hz), 5.62 (tdd, 2H,  $J = 6.2, 10.3, 12.3$  Hz), 5.07 (d, 2H,  $J = 17.2$  Hz), 4.92 (d, 2H,  $J = 10.3$  Hz), 4.90-4.49 (m, 8H), 3.80 (d, 4H,  $J = 5.8$  Hz), 3.50 (d, 2H,  $J = 16.8$  Hz), 2.87 (ddd, 2H,  $J = 1.3, 5.0, 16.6$  Hz).  $^{13}\text{C}$  NMR (125 MHz, DMSO- $d_6$ ):  $\delta$  170.2, 168.3, 147.4, 140.9, 135.5, 135.3, 129.4, 128.7, 128.6, 128.3, 128.0, 127.8, 123.4, 122.3, 117.6, 68.3, 62.6, 62.4, 58.4, 57.7, 49.4, 49.0, 44.6, 43.6. MS (Positive electrospray) calcd for  $(\text{C}_{34}\text{H}_{34}\text{N}_8\text{O}_2 + \text{H})^+$ : 587.28; found: 587.25. Crystals of **13** suitable for X-ray diffraction were grown from benzene (slow evaporation). Details of the crystallographic analysis are provided in a separate CIF file.

$\alpha,\gamma$  dimers **12**: yellow solid;  $R_f = 0.3$  (EtOAc). Two diastereomers of this material were separated by preparative thin layer chromatography (1:19 MeOH/PhH).

Diastereomer 1: yellow crystals,  $R_f = 0.65$  (1:19 MeOH/PhH), IR (film): 3640, 2980, 1739, 1675, 1413, 1150, 820, 740, 558  $\text{cm}^{-1}$ ;  $^1\text{H}$  NMR (400 MHz,  $\text{CD}_3\text{CN}$ ):  $\delta$  7.40-7.22 (m, 8H), 6.05 (ddd, 1H,  $J = 1.4, 5.2, 9.9$  Hz), 5.92-5.78 (m, 2H), 5.68 (dddd, 1H,  $J = 5.5, 7.2, 10.2, 17.4$  Hz), 5.42 (t, 1H,  $J = 1.7$  Hz), 5.24-5.03 (m, 3H), 4.91 (s, 2H), 4.90-4.88 (m, 1H), 4.81 (s, 2H), 4.78-4.61 (m, 4H), 3.99 (tdd, 1H,  $J = 1.5, 5.3, 13.8$  Hz), 3.78 (dd, 1H,  $J = 7.2, 13.8$  Hz), 3.69-3.50 (m, 1H), 3.48 (dd, 1H,  $J = 5.0, 13.2$  Hz), 3.38-3.23 (m, 2H), 3.11 (ddd, 1H,  $J = 2.4, 5.0, 10.5$  Hz), 3.01-2.92 (m, 1H), 2.28-2.25 (m, 1H); HRMS (ESI-TOF) calcd for  $(\text{C}_{34}\text{H}_{34}\text{N}_8\text{O}_2+\text{H})^+$ : calcd: 587.2877; found: 587.2878. Crystals of this material suitable for X-ray diffraction were grown from a mixture of  $\text{CH}_2\text{Cl}_2$  and  $\text{CH}_3\text{CN}$  (slow evaporation). Details of the crystallographic analysis are provided in a separate CIF file.

Diastereomer 2. Yellow solid,  $R_f = 0.60$  (1:19 MeOH/PhH), IR (film): 3640, 2980, 1739, 1675, 1413, 1150, 820, 740, 558  $\text{cm}^{-1}$ ;  $^1\text{H}$  NMR (400 MHz,  $\text{CD}_3\text{CN}$ ):  $\delta$  7.40-7.21 (m, 8H), 6.08 (ddd, 1H,  $J = 1.5, 5.2, 9.9$  Hz), 5.87-5.78 (m, 2H), 5.76-5.60 (m, 2H), 5.13-5.02 (m, 4H), 4.91 (s, 2H), 4.86-4.80 (m, 2H), 4.78-4.57 (m, 4H), 4.05-3.99 (m, 1H), 3.67 (ddd, 1H,  $J = 1.7, 4.9, 13.5$  Hz), 3.58-3.42 (m, 1H), 3.37-2.85 (m, 5H), 2.28-2.12 (m, 1H). MS (positive electrospray) calcd for  $(\text{C}_{34}\text{H}_{34}\text{N}_8\text{O}_2+\text{H})^+$ : 587.28; found: 587.25.

### Procedure B. $\text{FeCl}_2(\text{DMF})_3\text{FeCl}_4$ as oxidant

The THF used in this reaction was degassed via the freeze-pump-thaw method prior to use. Monomer **11** (0.150 g, 0.51 mmol) in THF (2.6 mL) was cooled to  $-78^\circ\text{C}$  and added via cannulating needle to a flask containing KHMDS (1.12 mL, 0.5M in toluene) at  $-78^\circ\text{C}$ . After stirring the resulting dark red mixture at  $-78^\circ\text{C}$  for 30 minutes, a solution of  $[\text{FeCl}_2(\text{DMF})_3][\text{FeCl}_4]$  (0.141 g, 0.26 mmol) in THF (0.4 mL) was added via syringe. The reaction was stirred at  $-78^\circ\text{C}$  for 3 hours. The reaction was quenched with pH 8.0 EDTA (3 mL). The majority of the solvent was removed *in vacuo* and the residue diluted in  $\text{CH}_2\text{Cl}_2$ . The solution was washed with pH 8.0 EDTA (0.35M, 3 x 10 mL), water and brine. The organic layer was dried over  $\text{Na}_2\text{SO}_4$ , filtered and concentrated *in vacuo*. Purification by silica gel chromatography (progression from 4:1 EtOAc/hexanes  $\rightarrow$  EtOAc  $\rightarrow$  99:1 EtOAc/MeOH) to afford  $\alpha, \alpha$  dimer **13** (16 mg, 11%),  $\alpha, \gamma$  dimers **12** (87 mg, 55%) and  $\gamma, \gamma$  dimers **14a/b** (16 mg, 11%) as orange solids.

$\gamma, \gamma$  dimers **14a/b**;  $R_f = 0.2$  (3:7  $\text{CH}_3\text{CN}$ :  $\text{CHCl}_3$ ); IR (film): 3400, 1669, 1456, 1404, 1181, 1066  $\text{cm}^{-1}$ ;  $^1\text{H}$  NMR (300 MHz,  $\text{CDCl}_3$ ):  $\delta$  7.35-7.25 (m, 8H), 6.03-5.84 (m, 2H), 5.59-5.53 (m, 2H), 5.12-5.06 (m, 4H), 5.02-4.86 (m, 4H), 4.80-4.62 (m, 4H), 3.62-3.57 (m, 2H), 3.28-3.08 (m, 4H), 2.80-2.42 (m, 4H).  $^{13}\text{C}$  NMR

(75MHz, CDCl<sub>3</sub>):  $\delta$  159.7, 141.2, 140.9, 134.0, 133.2, 129.1, 128.9, 128.8, 128.7, 120.0, 119.9, 102.4, 101.8, 58.2, 58.1, 49.7, 49.3, 48.4, 29.2, 28.5. HRMS (ESI-TOF) calcd for (C<sub>34</sub>H<sub>34</sub>N<sub>8</sub>O<sub>2</sub>+H)<sup>+</sup>: 587.2877; found: 587.2885.

#### Procedure C. Cu(OTf)<sub>2</sub> as oxidant.

The THF used in this reaction was degassed via the freeze-pump-thaw method prior to use. Monomer **11** (0.20 g, 0.68 mmol) was dissolved in THF (3.4 mL) and cooled to -78°C. This solution was added via cannulating needle to a flask containing KHMDS (1.23 mL, 0.5M in toluene) at -78°C. After stirring the resulting dark red mixture at -78°C for 30 min, a solution of Cu(OTf)<sub>2</sub> (0.177 g, 0.7 mmol) in THF (0.7 mL) was added via syringe. The reaction was stirred at -78°C for 3 h and quenched with aq pH 8.0 EDTA (0.35M) solution (3 mL). The mixture was concentrated *in vacuo* and diluted in CH<sub>2</sub>Cl<sub>2</sub>. The solution was washed with aqueous pH 8.0 EDTA solution (3 x 10 mL), water and brine. The organic layer was dried over Na<sub>2</sub>SO<sub>4</sub>, filtered and concentrated *in vacuo*. The residue was purified by silica gel chromatography (progression from 4:1 EtOAc/Hexanes → EtOAc → 99:1 EtOAc/MeOH) to afford  $\alpha,\alpha$  dimer **13** (47 mg, 24%),  $\alpha,\gamma$  dimers **12** (73 mg, 37%) and  $\gamma,\gamma$  dimers **14a/b** (50 mg, 25%) as orange solids.

#### Procedure D. Using [*i*-PrCp]<sub>2</sub>TiCl<sub>2</sub> additive and Cu(OTf)<sub>2</sub> as oxidant.

The THF used in this reaction was degassed via the freeze-pump-thaw method prior to use. KHMDS (7.3 mL, 0.5 M in toluene) was added dropwise to a solution of **11** (0.98 g, 3.33 mmol) in THF (18 mL) at -78°C. After stirring at -78°C for 30 min, the reaction mixture was added to a solution of [*i*-PrCp]<sub>2</sub>TiCl<sub>2</sub> (1.2 g, 3.53 mmol) in THF (24 mL). The reaction mixture was stirred at -78°C for 3 h before being added to a solution of Cu(OTf)<sub>2</sub> (1.97 g, 5.39 mmol) in THF (26.7 mL) at -78°C. The resulting mixture was stirred at -78°C for an additional 3.75 hours and quenched with aq pH 8.0 EDTA (0.35M) solution (20 mL). The reaction mixture was concentrated *in vacuo* and diluted in CH<sub>2</sub>Cl<sub>2</sub>. The solution was washed with aqueous pH 8.0 EDTA solution (3 x 50 mL), water, brine and dried over Na<sub>2</sub>SO<sub>4</sub>. After removal of solvent *in vacuo*, the residue was purified by silica gel chromatography (gradient from EtOAc to 99:1 EtOAc/MeOH) to afford **14a/b** as an orange solid (0.78 g, 80%).

#### 4,5-Dibromo-1H-pyrrole-2-carboxylate ethyl ester (G)



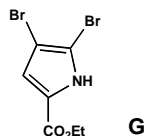

Sodium (0.66 g, 28.7 mmol) was dissolved in dry 180 mL EtOH. 2-(trichloroacetyl) pyrrole (50 g, 235 mmol) was added to the NaOEt solution over 10 minutes. The resultant dark red solution was stirred at rt for 40 min. The solvent was removed *in vacuo* and the residue diluted in Et<sub>2</sub>O. The ether solution was washed with 3N HCl. The black cotton-like solid was removed by filtration. The acidic aqueous washings were extracted with ether. The combined organic layers were washed the saturated NaHCO<sub>3</sub>, dried over MgSO<sub>4</sub>, filtered and concentrated *in vacuo* to give a light brown solid (32.1 g, 98%) that was used without further purification.

The crude ester from the previous step was dissolved in glacial AcOH (1275 mL). A solution of bromine (23.7 mL, 462 mmol) in AcOH (272 mL) was added via addition funnel over 2 h. The resultant solution was stirred at rt for 3 h. Removal of acetic acid *in vacuo* provided a pink solid (67.6 g, 99%) that was used without further purification.

#### 4,5-Dibromo-1-((2-(trimethylsilyl)ethoxy)methyl)-1H-pyrrole-2-carboxylate ethyl ester (**H**)

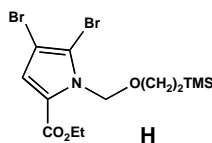

Et<sub>3</sub>N (38.4 mL, 274 mmol) was slowly added to a solution of **G** (67.6 g, 228 mmol) in THF (900 mL). The reaction was stirred at rt for 10 minutes and treated with SEM-Cl (38.34 g, 230 mmol). The reaction was stirred at rt for 2 h. The mixture was concentrated and the residue was taken up in CH<sub>2</sub>Cl<sub>2</sub>. The resulting solution was washed with water and brine, dried over Na<sub>2</sub>SO<sub>4</sub>, filtered and concentrated *in vacuo* to afford **H** as a brown oil (94.4 g, 97%). This material was used without further purification.

#### 4,5-Dibromo-1-((2-(trimethylsilyl)ethoxy)methyl)-1H-pyrrole-2-carboxylic acid (**I**)

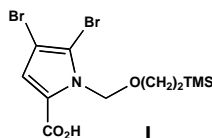

A solution of NaOH (17.6 g, 439 mmol) in H<sub>2</sub>O (218 mL) was added to a solution of **H** (94.4 g, 221 mmol) in THF/MeOH (1000 mL / 70 mL). The resulting solution was stirred at 65°C for 5 hours. The reaction was quenched with 10% aq citric acid. The solvents were removed *in vacuo* and the residue taken up in CH<sub>2</sub>Cl<sub>2</sub>. The solution was washed with saturated NH<sub>4</sub>Cl, water and brine. The organic layer was

dried over Na<sub>2</sub>SO<sub>4</sub>, filtered and concentrated *in vacuo* to give **I** as an off white solid (86.5g, 98%). This material was used without further purification.

**I**: IR (film): 3400, 1652, 1635, 1338, 1250, 1148, 667 cm<sup>-1</sup>; <sup>1</sup>H NMR (400 MHz, CDCl<sub>3</sub>): δ 7.21 (s, 1H), 5.81 (s, 2H), 3.60 (t, 2H, *J* = 8.4 Hz), 0.91 (t, 2H, *J* = 8.4 Hz), 0.02 (s, 9H). <sup>13</sup>C NMR (75MHz, CDCl<sub>3</sub>): δ 164.3, 123.2, 122.7, 115.3, 101.1, 75.5, 66.3, 17.8, -1.5. MS (positive electrospray) for (C<sub>11</sub>H<sub>17</sub>Br<sub>2</sub>NO<sub>3</sub>Si+H)<sup>+</sup> calcd: 399.93; found: 400.10.

**Methyl 1-(4,5-dibromo-1-((2-(trimethylsilyl)ethoxy)methyl)-1H-pyrrole-2-carbonyl)-1,4,5,6-tetrahydropyridazine-3-carboxylate (J)**

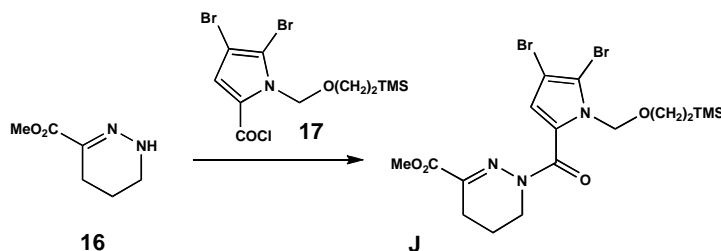

Oxalyl chloride (20.3 mL, 236 mmol) was added to a solution of acid **I** (47.1 g, 118 mmol) in CH<sub>2</sub>Cl<sub>2</sub> (400 mL). DMF (0.5 mL) was added and the resulting mixture was stirred at rt for 1 hour. The solvent was removed *in vacuo* to give a brown oily residue (**17**) that was dissolved in CH<sub>3</sub>CN (370 mL). To this solution was added **16** (16.8 g, 118 mmol), pyridine (19 mL, 236 mmol) and DMAP (50 mg) and the resulting mixture was stirred at rt overnight. The solvent was removed *in vacuo* and the residue taken up in CH<sub>2</sub>Cl<sub>2</sub>. The solution was washed with water and brine. The organic layer was dried over Na<sub>2</sub>SO<sub>4</sub>, filtered and concentrated *in vacuo*. Purification by silica gel chromatography (10→20% EtOAc/hexanes) provided **J** (58 g, 94%) as a white solid.

**J**: R<sub>f</sub> = 0.3 (1:4 EtOAc/CH<sub>2</sub>Cl<sub>2</sub>); IR (film): 1711, 1648, 1413, 1337, 1267, 1239, 1090, 973, 834 cm<sup>-1</sup>; <sup>1</sup>H NMR (400 MHz, CDCl<sub>3</sub>): δ 7.50 (s, 1H), 5.84 (s, 2H), 3.90-3.82 (m, 5H), 3.56 (t, 2H, *J* = 8.0 Hz), 2.56 (t, 2H, *J* = 6.4 Hz), 1.96 (td, 2H, *J* = 6.3, 12.4 Hz), 0.89 (t, 2H, *J* = 8.0 Hz), 0.04 (s, 9H); <sup>13</sup>C NMR (75MHz, CDCl<sub>3</sub>): δ 164.5, 160.0, 139.3, 125.2, 124.1, 113.2, 100.3, 76.0, 66.0, 52.5, 39.6, 21.8, 17.8, 16.6, -1.5. HRMS (ESI-TOF) calcd for (C<sub>17</sub>H<sub>25</sub>Br<sub>2</sub>N<sub>3</sub>O<sub>4</sub>Si+H)<sup>+</sup> 522.0054; found: 522.0057.

**1-(4,5-Dibromo-1-((2-(trimethylsilyl)ethoxy)methyl)-1H-pyrrole-2-carbonyl)-1,4,5,6-tetrahydropyridazine-3-carboxylic acid (18)**

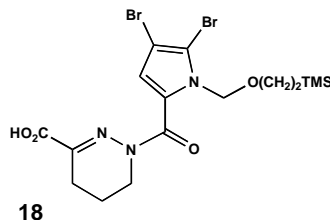

A solution of ester **J** (66 g, 126 mmol) in THF/H<sub>2</sub>O (520 mL / 250 mL) was stirred for 30 min in an ice-water bath. A solution of LiOH (30 mL, aq 0.5M) was added and the resulting mixture stirred at 4 °C for 1 h. The reaction was quenched with 10% aq citric acid and concentrated *in vacuo*. The residue was taken up in EtOAc and washed with saturated NH<sub>4</sub>Cl, water and brine. The organic layer was dried over Na<sub>2</sub>SO<sub>4</sub>, filtered and concentrated *in vacuo*. The resulting white solid (62.2 g, 97%) was used without further purification.

**18**: IR (film): 3203, 2951, 1715, 1652, 1422, 1240, 1179, 1096, 1096, 969, 860, 742, 684, 612 cm<sup>-1</sup>; <sup>1</sup>H NMR (400 MHz, CDCl<sub>3</sub>): δ 7.36 (s, 1H), 6.95 (bs, 1H), 5.74 (s, 2H), 3.86 (t, 2H, *J* = 5.6 Hz), 3.55 (t, 2H, *J* = 8 Hz), 2.61 (t, 2H, *J* = 6.4 Hz), 2.01 (td, 2H, *J* = 6.3, 12.3 Hz), 0.88 (t, 2H, *J* = 8 Hz), 0.06 (s, 9H). <sup>13</sup>C NMR (75MHz, CDCl<sub>3</sub>): δ 163.8, 160.5, 139.8, 128.3, 125.2, 121.5, 113.0, 100.4, 75.8, 66.4, 40.0, 21.0, 17.7, 16.4, -1.5. HRMS (ESI-TOF) calcd for (C<sub>16</sub>H<sub>23</sub>Br<sub>2</sub>N<sub>3</sub>O<sub>4</sub>Si+H)<sup>+</sup> 507.9897; found: 507.9898.

**(4,5-Dibromo-1-((2-(trimethylsilyl)ethoxy)methyl)-1H-pyrrol-2-yl)(3-(3-(methylthio)-2,5-dihydro-1H-benzo[e][1,3]diazepine-2-carbonyl)-5,6-dihydropyridazin-1(4H)-yl)methanone (19)**

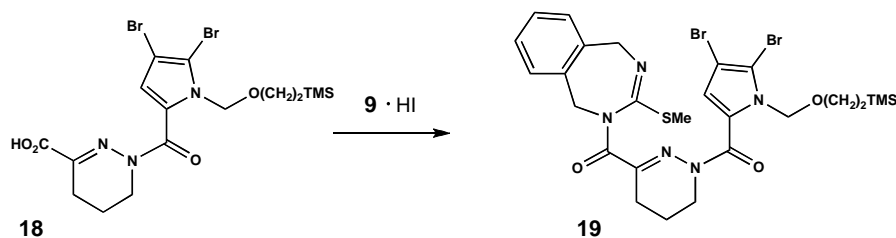

HI salt **9** (9.2 g, 28.9 mmol) was added to a solution of **18** (14 g, 27.5 mmol) in DMF (183 mL) at 0°C. TBTU (9.7 g, 30.3 mmol) was added, followed by the slow addition of (i-Pr)<sub>2</sub>NEt (14.4 mL, 82.5 mmol). The resulting mixture was stirred at rt for 3 h. The reaction mixture was diluted with 1L EtOAc and washed with sat. NH<sub>4</sub>Cl (2 x 200 mL), water (8 x 200 mL) and brine (200 mL). The organic layer was dried over Na<sub>2</sub>SO<sub>4</sub>, filtered and concentrated *in vacuo* to afford **19** as a slightly pink foam (18.5 g, 99%). This material was used without further purification.

**19**: R<sub>f</sub> = 0.9 (1:9 CH<sub>3</sub>CN/CHCl<sub>3</sub>); IR (film): 3420, 1645, 1430, 1340, 1241, 1130, 835, 750, 697 cm<sup>-1</sup>; <sup>1</sup>H NMR (400 MHz, CDCl<sub>3</sub>): δ 7.16-7.02 (m, 4H), 6.68 (s, 1H), 5.65 (s, 2H), 4.90 (s, 2H), 4.44 (s, 2H), 3.84 (t, 2H, *J* = 5.6 Hz), 3.46 (t, 2H, *J* = 8.0 Hz), 2.63 (t, 2H, *J* = 5.6 Hz), 2.31 (s, 3H), 2.04-1.98 (m, 2H), 0.86

(t, 2H,  $J = 8.0$  Hz), -0.07 (s, 9H).  $^{13}\text{C}$  NMR (75 MHz,  $\text{CDCl}_3$ ):  $\delta$  165.7, 161.8, 157.4, 146.6, 134.0, 133.8, 129.7, 127.9, 127.7, 127.2, 126.1, 120.9, 111.3, 99.9, 75.8, 66.2, 54.8, 45.9, 40.4, 23.9, 17.9, 17.3, 15.3, -1.2. HRMS (ESI-TOF) calcd for  $(\text{C}_{26}\text{H}_{33}\text{Br}_2\text{N}_5\text{O}_3\text{SSi}+\text{H})^+$  calcd: 682.0513; found: 682.0513.

### Reduction products **27** and **28**

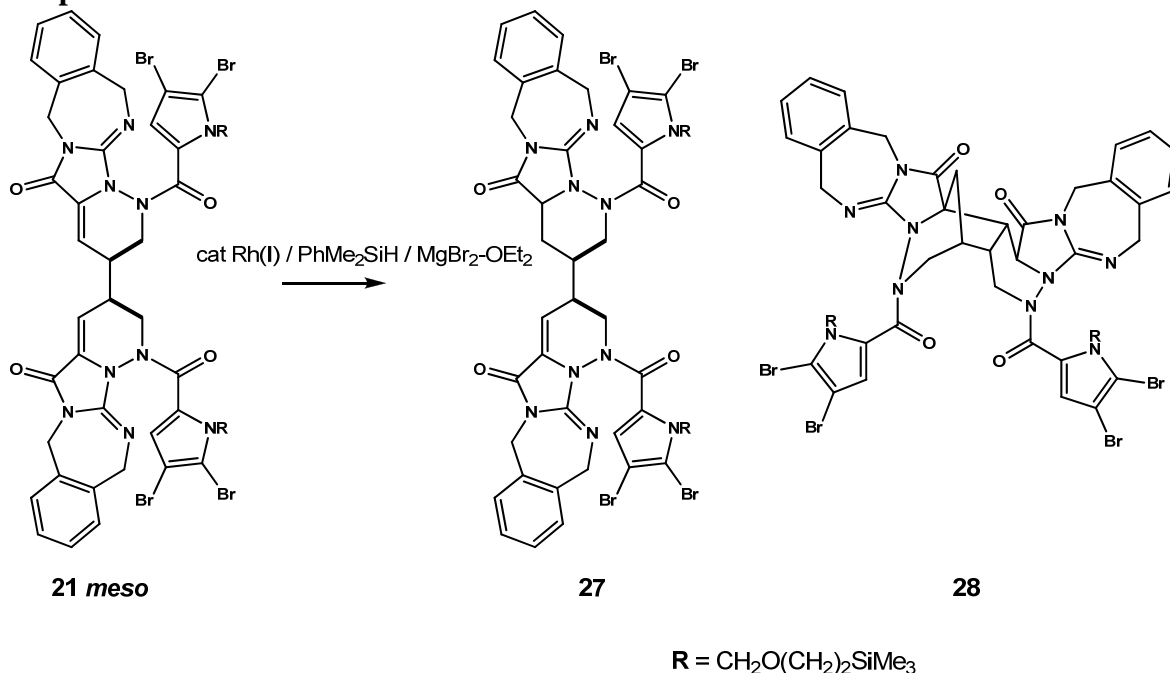

A solution of **21 meso** (40 mg, 0.032 mmol) and  $\text{MgBr}_2 \cdot \text{Et}_2\text{O}$  (12 mg, 0.047 mmol) in THF (0.3 mL) was stirred at rt for 10 min before evaporation of the solvent. The residue was re-dissolved in a stock solution of Rh(I) catalyst **31** (1 mg), 2-dicyclohexylphosphino-2'-(N,N-dimethylamino)biphenyl (1.2 mg) and  $\text{HSiMe}_2\text{Ph}$  (5.5  $\mu\text{L}$ , 0.035 mmol) in  $\text{CH}_2\text{Cl}_2$  (0.16 mL). The resulting mixture was heated at  $40^\circ\text{C}$  for 15 h. The reaction mixture was diluted with EtOAc, washed with saturated  $\text{NaHCO}_3$ , water and brine. The organic layer was dried over  $\text{Na}_2\text{SO}_4$ , filtered and concentrated *in vacuo*. Purification by silica gel chromatography (1:4 EtOAc/ $\text{CH}_2\text{Cl}_2$ ) afforded polycycle **28** (18 mg, 45%) and mono reduction product **27** (12 mg, 30%).

**28**: white film;  $R_f = 0.9$  (1:9  $\text{CH}_3\text{CN}/\text{CHCl}_3$ ); IR (film): 3430, 2950, 1751, 1695, 1684, 1448, 1418, 1409, 1247, 1091, 858, 835, 756, 700  $\text{cm}^{-1}$ ;  $^1\text{H}$  NMR (400 MHz,  $\text{CD}_3\text{CN}$ ):  $\delta$  7.42-7.24 (m, 8H), 6.70 (s, 1H), 6.60 (s, 1H), 5.63 (dd, 2H,  $J = 2.8, 10.5$  Hz), 5.58-5.42 (m, 2H), 5.18-4.90 (m, 4H), 4.68-4.55 (m, 3H), 4.40 (dd, 1H,  $J = 7.1, 13.1$  Hz), 4.26 (d, 1H,  $J = 11.2$  Hz), 4.13 (d, 1H,  $J = 13.6$  Hz), 3.74-3.46 (m, 4H), 3.41-3.24 (m, 2H), 3.05-2.93 (m, 1H), 2.88 (t, 1H,  $J = 11.6$  Hz), 2.58 (t, 1H,  $J = 12.8$  Hz), 2.66-2.45 (m, 1H), 1.92-1.88 (m, 1H), 1.42 (d, 1H,  $J = 11.8$  Hz), 1.02-0.78 (m, 4H), -0.02 (s, 9H), -0.06 (s, 9H).  $^{13}\text{C}$  NMR (75 MHz,  $\text{CDCl}_3$ ):  $\delta$  168.6, 167.8, 163.8, 159.4, 146.3, 142.4, 140.2, 134.4, 133.1, 128.8, 128.7, 128.5, 128.4,

128.0, 127.9, 127.8, 124.6, 118.4, 113.7, 111.3, 108.4, 100.8, 99.6, 75.5, 75.1, 67.7, 66.1, 53.2, 49.9, 49.3, 48.8, 44.0, 43.4, 40.8, 40.4, 33.6, 33.5, 31.5, 17.9, 17.8, -1.4, -1.4. MS (positive electrospray) calcd for  $(C_{50}H_{58}Br_4N_{10}O_6Si_2+H)^+$ : 1271.08; found 1270.94.

Treatment of **28** with excess  $BF_3$  etherate provided derivative **29**. Crystals of **29** (PTLC purified) suitable for X-ray diffraction were grown from  $CH_3CN$  (slow evaporation). Details of the crystallographic analysis are provided in a separate CIF file.

**27**: white foam;  $R_f$  = 0.65 (1:4  $CH_3CN$ :  $CHCl_3$ ); IR (film): 2951, 2873, 1749, 1630, 1403, 1248, 1092, 836, 667  $cm^{-1}$ ;  $^1H$  NMR (400 MHz,  $CD_3CN$ ):  $\delta$  7.40-7.18 (m, 8H), 6.76 (s, 1H), 6.69 (s, 1H), 5.82-5.79 (m, 1H), 5.62-5.38 (m, 4H), 5.00-4.56 (m, 8H), 4.44 (ddd, 1H,  $J$  = 1.8, 3.1, 12.9 Hz), 3.70 (dd, 1H,  $J$  = 11.6 Hz), 3.63 (t, 4H,  $J$  = 8.1 Hz), 3.48-3.38 (m, 1H), 2.54 (dd, 1H,  $J$  = 11.6, 12.8 Hz), 2.36 (dt, 1H,  $J$  = 5.2, 10.4 Hz), 2.08-2.03 (m, 1H), 2.01-1.98 (m, 1H), 1.78-1.62 (m, 1H), 1.35 (q, 1H,  $J$  = 12.3 Hz), 0.93-0.76 (m, 4H), 0.02 (s, 9H), -0.03 (s, 9H). MS (positive electrospray) calcd for  $(C_{50}H_{58}Br_4N_{10}O_6Si_2+H)^+$ : 1271.08; found 1271.04.

### Alkylidene **30**

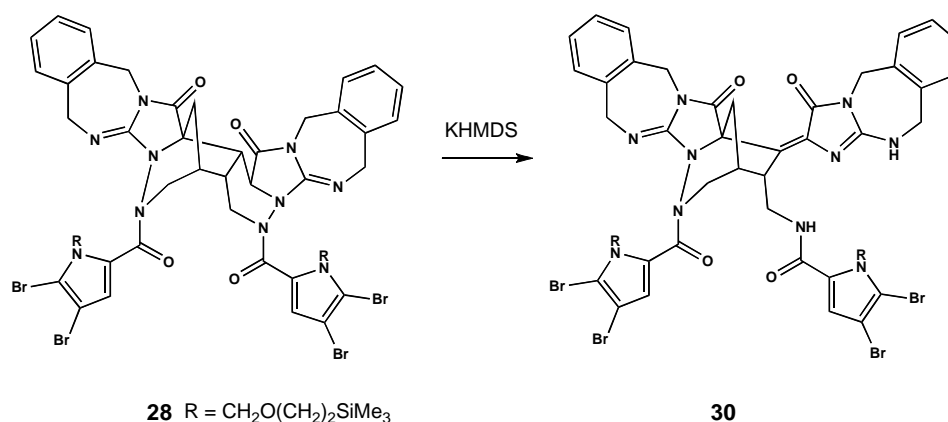

KHMDS (70  $\mu$ L, 0.5 M in toluene) was added to a solution of **28** (22 mg, 0.017 mmol) in THF (100  $\mu$ L) at  $-78^\circ C$ . The dark pink solution was stirred at  $-78^\circ C$  for 30 min and then warmed to rt. After stirring at rt for 30 min, 10  $\mu$ L AcOH was added and the solution diluted with  $CH_2Cl_2$ . The organics were washed with saturated aq  $NaHCO_3$ , water and brine, dried over  $Na_2SO_4$ , and concentrated *in vacuo*. Purification by preparative thin layer chromatography (3:7  $CH_3CN/CHCl_3$ ) afforded **30** as white film (18 mg, 80%).

**30**:  $R_f$  = 0.6 (3:7  $CH_3CN/CHCl_3$ );  $^1H$  NMR (400 MHz,  $CD_3CN$ ):  $\delta$  9.27 (app d, 1H,  $J$  = 7.4 Hz), 7.45-7.18 (m, 8H), 6.74 (s, 1H), 6.61 (s, 1H), 5.87 (d, 1H,  $J$  = 10.8 Hz), 5.82 (d, 1H,  $J$  = 10.8 Hz), 5.66 (d, 1H,  $J$  = 10.8 Hz), 5.39 (d, 1H,  $J$  = 10.8 Hz), 5.04-4.83 (m, 4H), 4.76-4.60 (m, 2H), 4.46-4.37 (m, 2H), 3.80-3.75 (m, 1H), 3.62-3.38 (m, 4H), 3.36-3.20 (m, 1H), 3.03-2.85 (m, 2H), 2.62-2.58 (m, 1H), 2.12-2.07 (m, 1H),

2.02-1.98 (m, 1H), 1.64 (d, 1H,  $J = 11.8$  Hz), 0.90-0.60 (m, 4H), -0.04 (s, 9H), -0.29 (s, 9H); MS (positive electrospray) calcd for  $(C_{50}H_{58}Br_4N_{10}O_6Si_2+H)^+$ : 1271.08; found 1270.94.

### Ring-opened product **32**

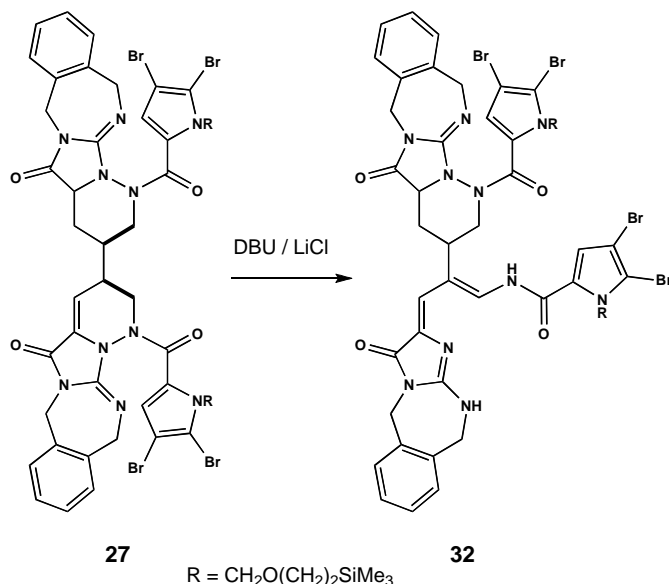

Reduction product **27** (20 mg, 0.016 mmol) was dissolved in a stock solution of LiCl (0.8 mg, 0.019 mmol) and DBU (3  $\mu$ L, 0.021 mmol) in DMF (100  $\mu$ L- argon sparged). After heating at 52°C for 3 h, the reaction mixture was quenched with acetic acid (5  $\mu$ L) and diluted with  $CH_2Cl_2$ . The resulting solution was washed with saturated  $NaHCO_3$ , water and brine. The organic layer was dried over  $Na_2SO_4$ , filtered and concentrated *in vacuo*. The residue was purified by preparative thin layer chromatography (1:4  $CH_3CN/CHCl_3$ ) to afford **32** as bright yellow solid (14 mg, 70%).

**32:**  $R_f = 0.8$  (2:9  $CH_3CN/CHCl_3$ );  $^1H$  NMR (400 MHz,  $CD_3CN/D_2O$ ):  $\delta$  7.20-7.45 (m, 8H), 6.87 (s, 1H), 6.82 (s, 1H), 6.75 (s, 1H), 5.92 (s, 1H), 5.79 (s, 2H), 5.64 (d, 1H,  $J = 10.8$  Hz), 5.46 (d, 1H,  $J = 10.7$  Hz), 4.88 (m, 5H), 4.50 (m, 3H), 4.31 (d, 1H,  $J = 12.4$  Hz), 3.85 (dd, 1H,  $J = 4.6, 11.4$  Hz), 3.50-3.57 (m, 4H), 2.75 (m, 1H), 2.53 (tt, 1H,  $J = 3.0, 11.8$  Hz), 2.17 (m, 1H), 1.62 (m, 1H), 0.77-0.90 (m, 4H), -0.04 (s, 9H), -0.02 (s, 9H). MS (positive electrospray) calcd for  $(C_{50}H_{58}Br_4N_{10}O_6Si_2+H)^+$ : 1271.08; found 1271.45.

### Saturated products **33**

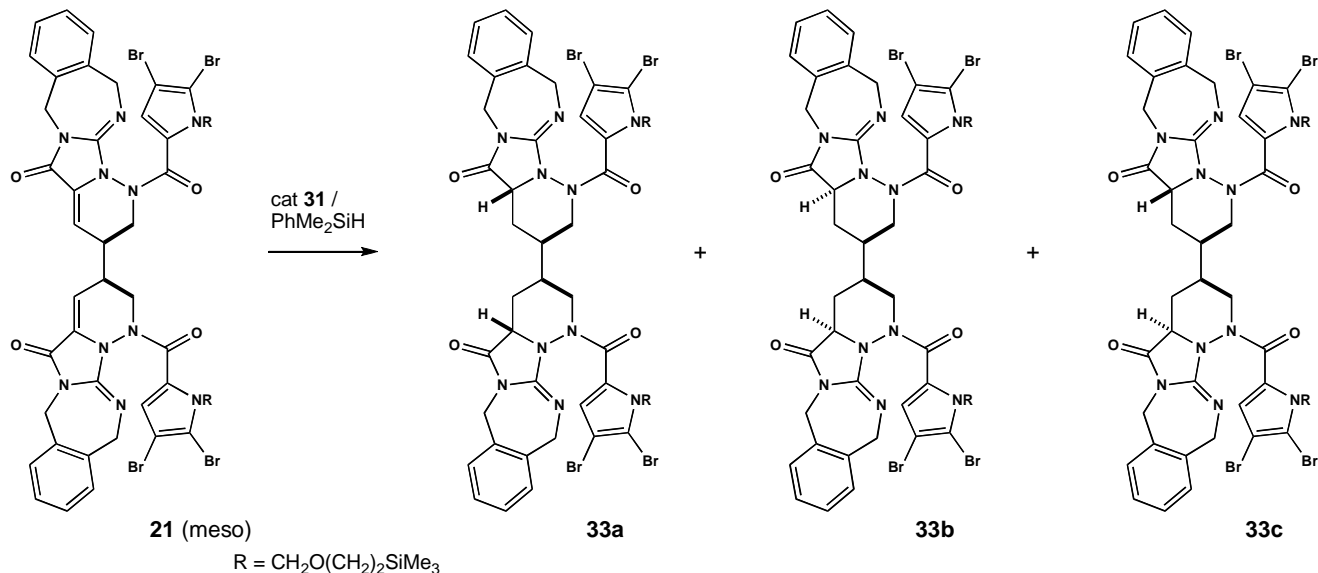

A solution of *meso* **21** (460 mg, 0.364 mmol),  $\text{MgI}_2$  (50 mg, 0.18 mmol), and  $\text{NH}_4\text{PF}_6$  (120 mg, 0.74 mmol) in THF (3 mL) was stirred at rt for 15 minutes and then the solvent was removed *in vacuo*. The residue was suspended in a stock solution of Rh(I) catalyst **31** (5.75 mg, 5 mol%), 2-dicyclohexylphosphino-2'-(N,N-dimethylamino)biphenyl (6.5 mg, 5.5 mol%) and  $\text{HSiMe}_2\text{Ph}$  (170  $\mu\text{L}$ , 1.10 mmol) in  $\text{CH}_2\text{Cl}_2$  (2.45 mL). The reaction mixture was heated at  $55^\circ\text{C}$  for 36 h and then diluted with  $\text{CH}_2\text{Cl}_2$ , washed with saturated  $\text{NaHCO}_3$ , water and brine. The organic layer was dried over  $\text{Na}_2\text{SO}_4$ , filtered and concentrated *in vacuo*. The residue was purified by silica gel chromatography (gradient from 1:9  $\rightarrow$  1:4 EtOAc/ $\text{CH}_2\text{Cl}_2$ ) to afford a mixture of **33a** + **33b** (395 mg, 66%) followed by **33c** (85 mg, 16%).

**33a** + **33b**: white solid;  $R_f = 0.45$  (1:4  $\text{CH}_3\text{CN}/\text{CHCl}_3$ ); IR (film): 3422, 2950, 1753, 1704, 1651, 1403, 1248, 1067, 836, 740, 610  $\text{cm}^{-1}$ ;  $^1\text{H}$  NMR (400 MHz,  $\text{CD}_3\text{CN}$ ):  $\delta$  7.39-7.31 (m, 8H), 6.77 (s, 2H), 5.67 (d, 2H,  $J = 10.6$  Hz), 5.48 (d, 2H,  $J = 10.6$  Hz), 4.92 (s, 4H), 4.78 (d, 2H,  $J = 14.4$  Hz), 4.58 (d, 2H,  $J = 14.4$  Hz), 4.42-4.38 (m, 2H), 3.78 (dd, 2H,  $J = 4.9, 11.6$  Hz), 3.56 (t, 4H,  $J = 7.9$  Hz), 2.49 (dd, 2H,  $J = 11.2, 12.8$  Hz), 2.25-2.08 (m, 2H), 1.63-1.58 (m, 2H), 1.37-1.22 (m, 2H), 0.97-0.81 (m, 4H), 0.00 (s, 18H).  $^{13}\text{C}$  NMR (125 MHz,  $\text{CDCl}_3$ ):  $\delta$  169.6, 164.2, 145.6, 140.4, 133.4, 129.6, 128.9, 128.8, 117.7, 111.4, 99.8, 75.4, 66.5, 56.5, 49.6, 43.6, 43.4, 35.1, 30.5, 18.2, -1.1. MS (positive electrospray) calcd for  $(\text{C}_{50}\text{H}_{60}\text{Br}_4\text{N}_{10}\text{O}_6\text{Si}_2 + \text{H})^+$ : 1273.09; found 1273.1. Crystals of **33b** suitable for X-ray diffraction were grown from  $\text{CH}_3\text{CN}$  (slow evaporation). Details of the crystallographic analysis are provided in a separate CIF file.

**33c**:  $R_f = 0.2$  (1:4  $\text{CH}_3\text{CN}/\text{CHCl}_3$ ); IR (film): 2952, 1754, 1693, 1403, 1299, 1248, 1155, 1092, 941  $\text{cm}^{-1}$ ;  $^1\text{H}$  NMR (400 MHz,  $\text{CDCl}_3$ ):  $\delta$  7.38-7.28 (m, 8H), 6.77 (s, 1H), 6.76 (s, 1H), 5.67-5.55 (m, 4H), 5.00-4.57

(m, 8H), 4.44-4.39 (m, 1H), 4.08-4.02 (m, 2H), 3.79 (dd, 1H,  $J = 4.9, 11.6$  Hz) 3.52 (dd, 4H,  $J = 8.4, 16.9$  Hz), 3.15 (dd, 1H,  $J = 4.9, 13.1$  Hz), 2.32 (dd, 1H,  $J = 11.7, 12.6$  Hz), 2.24-2.18 (m, 1H), 2.04-1.96 (m, 3H), 1.80-1.65 (m, 1H), 1.08-1.03 (m, 1H), 1.00-0.77 (m, 4H), -0.01 (s, 9H), -0.04 (s, 9H).  $^{13}\text{C}$  NMR (125 MHz,  $\text{CDCl}_3$ ):  $\delta$  170.3, 169.6, 163.7, 146.9, 145.3, 140.5, 140.1, 133.6, 129.5, 128.8, 128.7, 128.6, 128.5, 125.7, 117.4, 111.2, 110.9, 99.7, 99.6, 75.6, 75.3, 60.6, 56.5, 56.3, 49.6, 49.4, 43.9, 43.7, 43.5, 43.1, 33.0, 32.7, 30.8, 27.0, 21.3, 18.1, 18.0, 14.4, -1.1, -1.2. MS (positive electrospray) calcd for  $(\text{C}_{50}\text{H}_{60}\text{Br}_4\text{N}_{10}\text{O}_6\text{Si}_2+\text{H})^+$ : 1273.09; found 1272.80.

### Mono alkylidene **L** and symmetric bis-alkylidene **34**

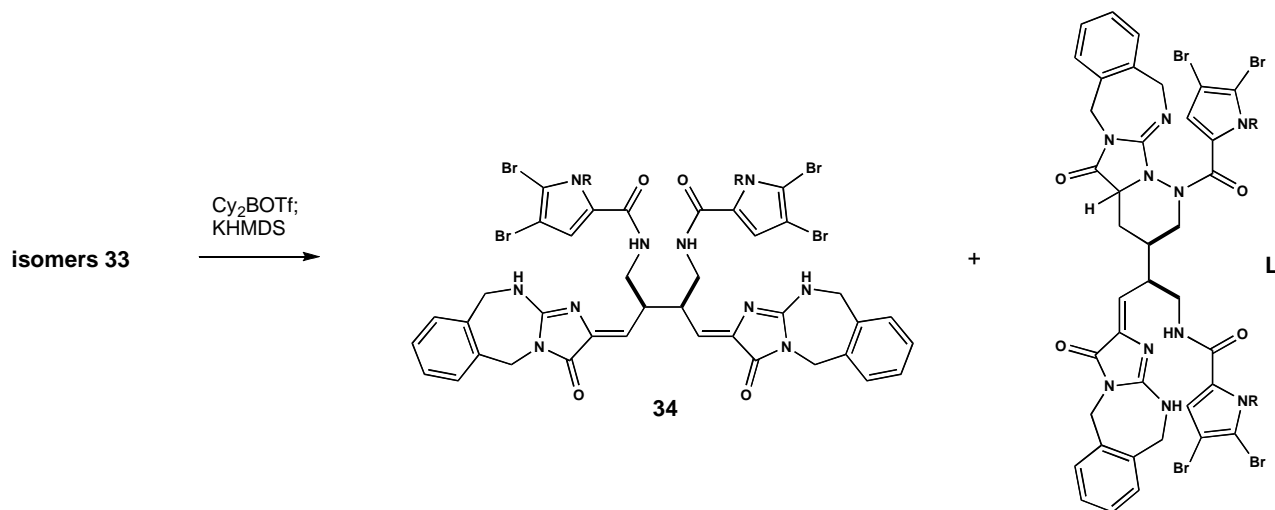

A solution of  $\text{Cy}_2\text{BOTf}$  (47 mg, 0.144 mmol) in THF (0.48 mL) was cooled to  $-78^\circ\text{C}$  and added rapidly to a solution of **33a/b/c** (60 mg, 0.047 mmol) in THF (1.5 mL) at  $-78^\circ\text{C}$ . KHMDS (0.5M in toluene, 470  $\mu\text{L}$ ) was then added and the cooling bath immediately removed. The red solution was warmed to rt and quenched with 20  $\mu\text{L}$  AcOH. The reaction was diluted with  $\text{CH}_2\text{Cl}_2$  and washed with saturated  $\text{NaHCO}_3$ , water and brine. The organic layer was dried over  $\text{Na}_2\text{SO}_4$ , filtered and solvent was removed *in vacuo*. The residue was purified by silica gel column chromatography (1:49 MeOH/ $\text{CH}_2\text{Cl}_2$ ) to afford **34** as light yellow solid (32 mg, 53%) along with mono alkylidene **L** (16 mg, 27%). Analytically pure **34** was obtained as a white powder following triturating with  $\text{CH}_3\text{CN}$ .

**34**:  $R_f = 0.5$  (1:19 MeOH/ $\text{CH}_2\text{Cl}_2$ ); IR (film): 1668, 1606, 1425, 1317, 1245, 1091, 836  $\text{cm}^{-1}$ ;  $^1\text{H}$  NMR (500 MHz,  $\text{DMSO}-d_6$ ):  $\delta$  8.30 (bs, 2H), 8.01 (bs, 2H), 7.38-7.31 (m, 8H), 6.76 (s, 2H), 5.71 (d, 4H,  $J = 10.5$  Hz), 5.64 (d, 2H,  $J = 10.5$  Hz), 5.56 (d, 2H,  $J = 7.2$  Hz), 4.87 (s, 4H), 4.45 (s, 4H), 3.41 (t, 4H,  $J = 7.8$  Hz), 3.15-2.95 (m, 4H), 0.71 (t, 4H,  $J = 7.8$  Hz), -0.13 (s, 18H);  $^{13}\text{C}$  NMR (125MHz,  $\text{DMSO}-d_6$ ):  $\delta$  167.0, 159.4, 157.5, 142.1, 138.8, 135.1, 128.7, 128.6, 128.3, 128.2, 117.1, 114.8, 110.1, 98.8, 94.3, 74.3, 65.1,



43.3, 42.5, 41.8, 40.0, 17.0, -1.5; MS (positive electrospray) calcd for  $(C_{50}H_{60}Br_4N_{10}O_6Si_2+H)^+$ : 1273.09; found 1272.80.

**L**: off-white solid;  $R_f = 0.75$  (1:19 MeOH/ $CH_2Cl_2$ ); IR (film): 3400, 2952, 1644, 1418, 1247, 1068, 835  $cm^{-1}$ ;  $^1H$  NMR (400 MHz,  $CD_3CN$ ):  $\delta$  7.42-7.20 (m, 8H), 6.72 (s, 1H), 6.67 (s, 1H), 5.80-5.42 (m, 5H), 4.95-4.86 (m, 4H), 4.80-4.77 (m, 1H), 4.58-4.46 (m, 2H), 4.38-4.35 (m, 1H), 3.78 (dd, 1H,  $J = 11.6, 4.9$  Hz), 3.62-3.43 (m, 5H), 3.37-3.26 (m, 1H), 2.76 (ddd, 1H,  $J = 4.1, 8.9, 13.4$  Hz), 2.50-2.42 (m, 1H), 2.31-2.25 (m, 1H), 1.90-1.85 (m, 1H), 1.36-1.20 (m, 2H), 0.93-0.75 (m, 4H), -0.03 (s, 9H), -0.06 (s, 9H).  $^{13}C$  NMR (125MHz,  $CDCl_3$ ):  $\delta$  169.8, 166.8, 164.4, 160.3, 157.9, 145.8, 141.5, 140.6, 137.4, 134.5, 133.2, 129.6, 129.5, 129.1, 128.8, 128.7, 128.6, 128.6, 128.5, 125.5, 117.6, 116.5, 115.6, 111.2, 110.9, 99.7, 75.5, 75.1, 70.8, 70.5, 66.4, 66.3, 56.8, 49.4, 45.3, 44.2, 43.7, 43.4, 41.5, 40.2, 35.8, 34.6, 31.3, 30.4, 25.7, 24.4, 18.2, 18.0, -1.1, -1.2. MS (positive electrospray) calcd for  $(C_{50}H_{60}Br_4N_{10}O_6Si_2+H)^+$ : 1273.09; found 1272.80.

### Spirocyclic products derived from **34**

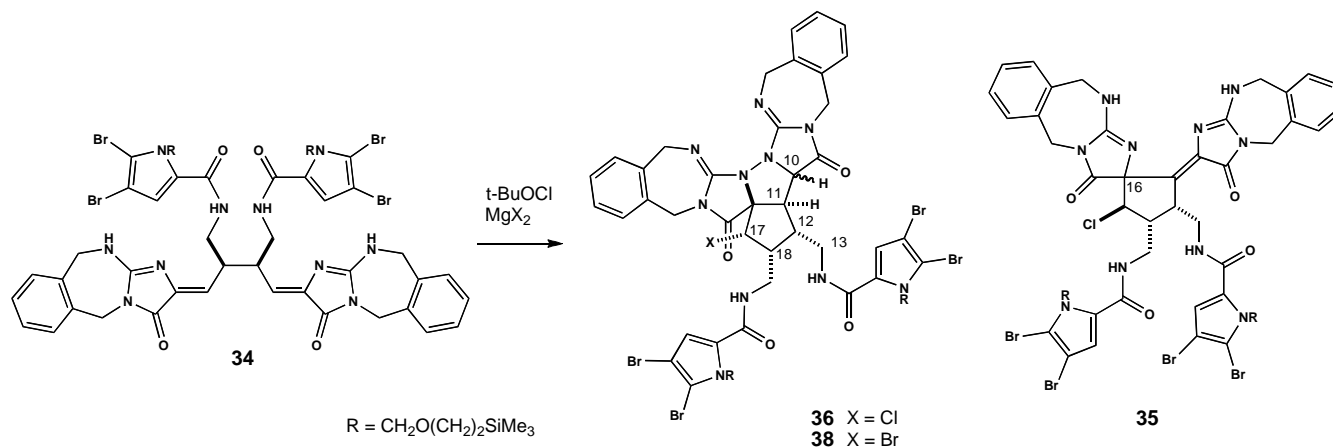

### Procedure A. no additive

Bisalkylidene **34** (40 mg, 0.031 mmol) was dissolved in 1 mL THF and the resulting mixture was cooled to  $-78^\circ C$ . A solution of freshly prepared  $t\text{-BuOCl}$  (see *Organic Syntheses*, Coll. Vol. 5, p.184 (1973) – 4.2  $\mu L$ , 0.038 mmol) in  $CH_2Cl_2$  (50  $\mu L$ ) was added and the reaction was stirred at  $-78^\circ C$  for 2 h and rt for another 2 h. The solvent was removed *in vacuo* and the residue was purified by preparative thin layer chromatography ( $CH_3OH:CH_2Cl_2 = 1:19$ ). This affords one impure diastereomer of **36** (**36b**) followed by a pure second diastereomer (**36a**) and impure alkylidene **35**.

**36a:** (4 mg, 10% yield): white film;  $R_f = 0.7$  (MeOH:CH<sub>2</sub>Cl<sub>2</sub> = 5:95); IR (film, cm<sup>-1</sup>): 2923, 1750, 1650, 1513, 1455, 1404, 1247, 1092, 948, 836; <sup>1</sup>H NMR (500 MHz, CD<sub>3</sub>CN): 7.85 (dd, 1H,  $J = 4.5, 7.3$  Hz), 7.57 (t, 1H,  $J = 5.6$  Hz), 7.42-7.21 (m, 8H), 7.07 (s, 1H), 6.89 (s, 1H), 5.85-5.76 (m, 4H), 4.74 (d, 1H,  $J = 2.9$  Hz), 4.70-4.55 (m, 3H), 4.53 (d, 1H,  $J = 3.9$  Hz), 4.35-4.26 (m, 2H), 4.20-3.96 (m, 2H), 3.80-3.73 (m, 3H), 3.62 (ddd, 1H,  $J = 1.9, 5.7, 14.2$  Hz), 3.52-3.45 (m, 4H), 3.41 (ddd, 1H,  $J = 4.5, 9.8, 14.0$  Hz), 3.21-3.14 (m, 1H), 2.59 (td, 1H,  $J = 5.4, 9.4$  Hz), 2.16 (1H, overlapped with H<sub>2</sub>O peak), 0.96-0.87 (m, 4H), -0.09 (s, 9H), -0.11 (s, 9H). <sup>13</sup>C NMR (125 MHz, CDCl<sub>3</sub>): 170.0, 162.7, 161.2, 160.5, 148.4, 140.0, 133.5, 129.7, 129.6, 128.9, 128.8, 128.7, 128.4, 127.8, 127.5, 117.0, 116.4, 112.2, 111.6, 100.3, 100.0, 88.0, 77.5, 75.7, 75.3, 66.7, 66.2, 65.8, 58.0, 56.6, 49.0, 43.7, 43.4, 41.0, 38.6, 37.0, 35.9, 18.1, -1.2, -1.2. HRMS (ESI-TOF) calcd for (C<sub>50</sub>H<sub>59</sub>Br<sub>4</sub>ClN<sub>10</sub>O<sub>6</sub>Si<sub>2</sub>+H)<sup>+</sup>: 1307.0539; found 1307.3955.

**36b:** impure material was subjected to a second preparative thin layer chromatography, eluting with 10% CH<sub>3</sub>CN/CHCl<sub>3</sub>, to afford **36b** (~1 mg) as a white film. **36b:**  $R_f = 0.8$  (MeOH: CH<sub>2</sub>Cl<sub>2</sub> = 5:95); IR (film): 2852, 1737, 1681, 1543, 1456, 1397, 1248, 1093, 949 cm<sup>-1</sup>; <sup>1</sup>H NMR (400 MHz, CD<sub>3</sub>CN):  $\delta$  7.57 (t, 1H,  $J = 5.0$  Hz), 7.45 (t, 1H,  $J = 5.4$  Hz), 7.38-7.20 (m, 8H), 7.06 (s, 1H), 6.90 (s, 1H), 5.84-5.63 (m, 4H), 5.25 (d, 1H,  $J = 4.0$  Hz), 5.05-4.57 (m, 7H), 4.50 (m, 1H), 4.29 (d, 1H,  $J = 5.5$  Hz), 4.17-4.12 (m, 1H), 3.63 (ddd, 1H,  $J = 3.5, 5.8, 14.9$  Hz), 3.70-3.42 (m, 6H), 3.38-3.26 (m, 1H), 2.57 (tt, 1H,  $J = 5.7, 11.3$  Hz), 2.30-2.25 (m, 1H), 0.97-0.78 (m, 2H), 0.76-0.62 (m, 2H), -0.05 (s, 9H), -0.12 (s, 9H). MS (MALDI) calcd for (C<sub>50</sub>H<sub>59</sub>Br<sub>4</sub>ClN<sub>10</sub>O<sub>6</sub>Si<sub>2</sub>+H)<sup>+</sup>: 1307.05; found 1307.25.

**35:** impure material was subjected to a second preparative thin layer chromatography, eluting with 10% CH<sub>3</sub>OH/CH<sub>2</sub>Cl<sub>2</sub>) to afford **35** as a white film (8 mg, 20% yield). **35:**  $R_f = 0.4$  (MeOH:CH<sub>2</sub>Cl<sub>2</sub> = 1:9); IR (film): 2945, 1681, 1601, 1547, 1418, 1312, 1248, 1092, 857 cm<sup>-1</sup>; <sup>1</sup>H NMR (400 MHz, CD<sub>3</sub>CN):  $\delta$  8.52 (appr s, 1H), 7.42-7.27 (m, 8H), 7.05-7.02 (m, 1H), 6.85 (s, 1H), 6.72 (s, 1H), 5.87 (dd, 2H,  $J = 10.5, 12$  Hz), 5.72 (t, 2H,  $J = 10.0$  Hz), 4.90-4.45 (m, 7H), 4.30 (d, 1H,  $J = 14.8$  Hz), 4.26 (d, 1H,  $J = 12.7$  Hz), 3.76 (td, 2H,  $J = 3.9, 12.4$  Hz), 3.74-3.40 (m, 7H), 3.24 (dt, 2H,  $J = 3.9, 12.5$  Hz), 2.98-2.81 (m, 1H), 0.95-0.79 (m, 4H), -0.07 (s, 18H). MS (MALDI) calcd for (C<sub>50</sub>H<sub>59</sub>Br<sub>4</sub>ClN<sub>10</sub>O<sub>6</sub>Si<sub>2</sub>+H)<sup>+</sup>: 1307.05; found 1307.50.

## Procedure B. MgCl<sub>2</sub> additive

Bisalkylidene **34** (10 mg, 0.0075 mmol) and MgCl<sub>2</sub> (1.5 mg, 0.016mmol) were dissolved in THF (0.25 mL) and the mixture was cooled to -78°C. A solution of freshly prepared *t*-BuOCl (1  $\mu$ L, 0.0075 mmol) in CH<sub>2</sub>Cl<sub>2</sub> (50  $\mu$ L) was added and the reaction mixture was stirred at -78°C for 2 h and at rt for another 2 h.

The solvent was removed *in vacuo* and the residue purified by preparative thin layer chromatography (CH<sub>3</sub>OH: CH<sub>2</sub>Cl<sub>2</sub> = 1:19) to afford **36a** (2.8 mg, 26%), **35** (< 1 mg) and recovered **34** (3 mg, 30%).

### Procedure C. MgBr<sub>2</sub>•Et<sub>2</sub>O additive

Bisalkylidene **34** (60 mg, 0.047 mmol) and MgBr<sub>2</sub>•Et<sub>2</sub>O (15 mg, 0.058mmol) were dissolved in 0.8 mL THF and the mixture cooled to -78°C. A solution of freshly prepared *t*-BuOCl (6 µL, 0.054 mmol) in CH<sub>2</sub>Cl<sub>2</sub> (100 µL) was added and the reaction stirred at -78°C for 2 h and at rt for another 2 h. The solvent was evaporated and the residue was purified by preparative thin layer chromatography (CH<sub>3</sub>OH:CH<sub>2</sub>Cl<sub>2</sub> = 1:19) to afford two inseparable diastereomers of **38** as a light yellow solid (45 mg, 75%). These materials have <sup>1</sup>H NMR spectra that are identical to **36a/b**. They are distinguished only by mass: MS (MALDI) calcd for C<sub>50</sub>H<sub>59</sub>Br<sub>4</sub>Si<sub>2</sub>(M+H)<sup>+</sup>: 1351.00; found 1350.80.

**Table 1. Summary of <sup>1</sup>H and <sup>13</sup>C NMR data in CD<sub>3</sub>CN for compound 36a.**

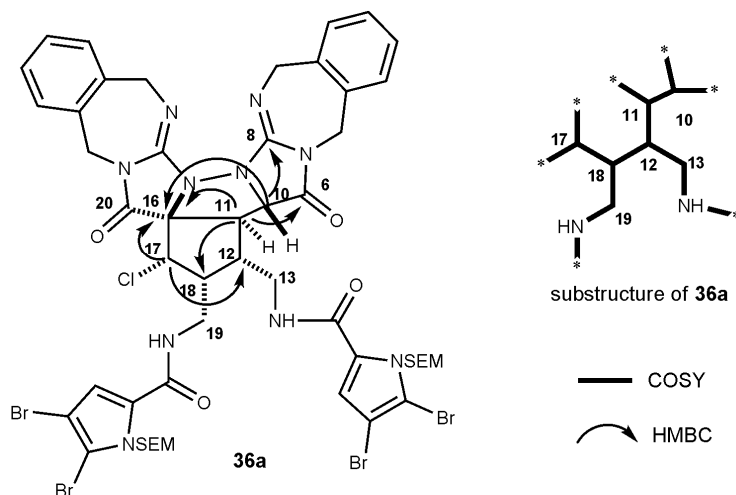

| position | <sup>a</sup> δ <sub>C</sub> | <sup>b</sup> δ <sub>H</sub> (mult, <i>J</i> Hz) | COSY (H no.)           | <sup>2,3</sup> <i>J</i> <sub>CH</sub> HMBC (C no.) |
|----------|-----------------------------|-------------------------------------------------|------------------------|----------------------------------------------------|
| 6        | 171.2                       |                                                 |                        |                                                    |
| 8        | 149                         |                                                 |                        |                                                    |
| 10       | 58.8                        | 3.77 (appr s)                                   |                        | 6, 8, 12, 16                                       |
| 11       | 66.5                        | 4.74 (d, <i>J</i> =2.9Hz)                       | 12                     | 6, 16, 18                                          |
| 12       | 41.3                        | 2.15 <sup>a</sup>                               | 11, 13 (3.17), 18      |                                                    |
| 13       | 37.8                        | 3.62 (ddd, <i>J</i> =1.9, 5.7, 14.2Hz)          | 13, N-H                | 17                                                 |
|          |                             | 3.17 (m)                                        | 12, 13, N-H            | 17, 12                                             |
| 16       | 89                          |                                                 |                        |                                                    |
| 17       | 57                          | 4.53 (d, <i>J</i> =3.9Hz)                       | 18                     | 16, 12                                             |
| 18       | 36.4                        | 2.59 (m)                                        | 17, 19(3.84, 3.42), 12 |                                                    |

|    |      |                              |        |    |
|----|------|------------------------------|--------|----|
| 19 | 39.2 | 3.84 (m)                     | 18, NH | 12 |
|    |      | 3.42 (ddd, J=4.5, 9.8, 14Hz) | 18, NH |    |

**Table 2. NOESY data for 36a.**

| position | <sup>b</sup> δ <sub>H</sub> (mult, <i>J</i> Hz) | NOESY           |
|----------|-------------------------------------------------|-----------------|
| 10       | 3.77 (appr s)                                   | 12, 18,         |
| 11       | 4.74 (d, J=2.9Hz)                               | 12,13a          |
| 12       | 2.15                                            | 18, 10, 13a, 11 |
| 13b      | 3.62 (ddd, J=1.9, 5.7, 14.2Hz)                  | 12,13a          |
| 13a      | 3.17 (m)                                        | 12, 13a,11      |
| 17       | 4.53 (d, J=3.9Hz)                               | 18              |
| 18       | 2.59 (m)                                        | 10, 12          |
| 19b      | 3.84 (m)                                        | 19a             |
| 19a      | 3.42 (ddd, J=4.5, 9.8, 14Hz)                    | 19,a            |

The relative stereochemistry in **36a** was assigned based on coupling constants and NOESY spectra. The 3.9 Hz coupling constant between H17 and H18 supports a *cis* stereochemistry. The correlations between H10, H12 and H10, H18 suggests these three protons are on the same face of the diazabicyclo[3.3.0]octane ring system. The small coupling constant between H11, H10 (*J* < 1 Hz) indicates a *trans* relationship. This only leaves the quaternary center C16 uncertain.

**Table 2: NMR Data for Compound 44<sup>a</sup>**

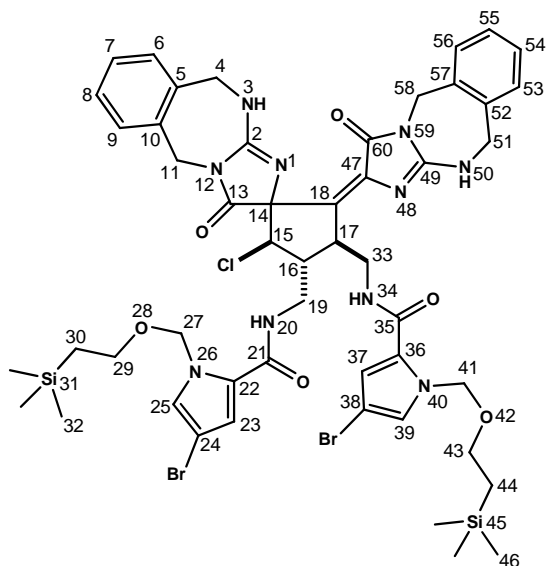

| Carbon No. | $^{13}\text{C}$<br>$\delta$ (ppm) <sup>b</sup> | Mult.           | $^1\text{H}$<br>$\delta$ (ppm) (mult J (Hz)) <sup>c,d,e</sup> | HMBC<br>Correlations <sup>f</sup>   |
|------------|------------------------------------------------|-----------------|---------------------------------------------------------------|-------------------------------------|
| 2          | 158.7                                          | Q               |                                                               | H4a, H-4b, H-11                     |
| 4          | 45.7                                           | CH <sub>2</sub> | H-4a: 4.56 (d, 14.8)<br>H-4b: 4.38 (d, 15.0)                  |                                     |
| 5          | 140.3                                          | Q               |                                                               |                                     |
| 6          |                                                | CH              |                                                               |                                     |
| 7          |                                                | CH              |                                                               |                                     |
| 8          |                                                | CH              |                                                               |                                     |
| 9          |                                                | CH              |                                                               |                                     |
| 10         | 136.6                                          | Q               |                                                               |                                     |
| 11         | 45.0                                           | CH <sub>2</sub> | H-11: 4.92 (s)                                                | H-9                                 |
| 13         | 178.9                                          | Q               |                                                               | H-15, H-11                          |
| 14         |                                                | Q               |                                                               |                                     |
| 15         | 69.7                                           | CH              | H-15: 4.01 (d, 11.6)                                          | H-19a, H-19b                        |
| 16         | 47.8                                           | CH              | H-16: 2.32-2.25 (m)                                           | H-15, H-19a, H-19b,<br>H-33a, H-33b |
| 17         | 46.0                                           | CH              | H-17: 3.13 (ddd, 8.8, 4.1, 4.1)                               | H-19a, H-19b, H-33b                 |
| 18         | 138.5                                          | Q               |                                                               |                                     |
| 19         | 40.2                                           | CH <sub>2</sub> | H-19a: 3.65 (ddd, 14.3, 6.0, 4.3)<br>H-19b: 3.49-3.38 (m)     | H-15                                |
| 21         | 162.4                                          | Q               |                                                               | H-23, H-25                          |
| 22         | 128.3                                          | Q               |                                                               | H-23, H-25                          |
| 23         | 116.5                                          | CH              | H-23: 6.75 (d, 1.9)                                           | H-25                                |
| 24         | 96.3                                           | Q               |                                                               | H-25                                |
| 25         | 127.8                                          | CH              | H-25: 7.02 (d, 1.9)                                           |                                     |
| 27         | 78.0                                           | CH <sub>2</sub> | H-27a: 5.61 (d, 10.3)<br>H-27b: 5.56 (d, 10.3)                | H-25, H-29                          |
| 29         | 67.2                                           | CH <sub>2</sub> | H-29: 3.49-3.38 (m)                                           | H-27a, H-27b, H-30                  |
| 30         | 18.6                                           | CH <sub>2</sub> | H-30: 0.79 (t, 2.0)                                           | H-29                                |
| 32         | -1.0                                           | CH <sub>3</sub> | H-32: -0.14 (s)                                               | H-30                                |
| 33         | 42.9                                           | CH <sub>2</sub> | H-33a: 3.77 (ddd, 13.1, 4.1, 4.1)<br>H-33b: 3.49-3.38 (m)     |                                     |
| 35         | 162.5                                          | Q               |                                                               |                                     |
| 36         | 129.0                                          | Q               |                                                               | H-37, H-39                          |
| 37         | 116.8                                          | CH              | H-37: 6.83 (d, 1.7)                                           | H-39                                |
| 38         | 96.4                                           | Q               |                                                               | H-38                                |
| 39         | 127.3                                          | CH              | H-39: 7.00 (d, 1.9)                                           |                                     |

|    |       |                 |                                                |                    |
|----|-------|-----------------|------------------------------------------------|--------------------|
| 41 | 77.6  | CH <sub>2</sub> | H-41a: 5.59 (d, 10.3)<br>H-41b: 5.58 (d, 10.3) | H-39, H-43         |
| 43 | 67.0  | CH <sub>2</sub> | H-43: 3.49-3.38 (m)                            | H-41, H-44         |
| 44 | 18.6  | CH <sub>2</sub> | H-44: 0.77-0.71 (m)                            | H-43               |
| 46 | -1.0  | CH <sub>3</sub> | H-46: -0.10 (s)                                | H-44               |
| 47 |       | Q               |                                                |                    |
| 49 | 158.7 | Q               |                                                | H-51a, H-51b, H-58 |
| 51 | 45.2  | CH <sub>2</sub> | H-51a: 4.49 (d, 15.0)<br>H-51b: 4.38 (d, 15.0) |                    |
| 52 | 139.8 | Q               |                                                |                    |
| 53 |       | CH              |                                                |                    |
| 54 |       | CH              |                                                |                    |
| 55 |       | CH              |                                                |                    |
| 56 |       | CH              |                                                |                    |
| 57 | 136.4 | Q               |                                                |                    |
| 58 | 44.1  | CH <sub>2</sub> | H-58: 4.73 (s, 2H)                             | H-56               |
| 60 | 166.5 | Q               |                                                | H-58               |

<sup>a</sup>The numbering scheme used here is unique to this analysis.

<sup>b</sup> Recorded at 150 MHz. <sup>c</sup> Recorded at 600 MHz. <sup>d</sup> Assignments based on HMQC data.

<sup>e</sup> Methylene protons are arbitrarily designated H-Xa and H-Xb.

<sup>f</sup> Only those correlations which could be unambiguously assigned are recorded.

**Table 3: COSY Data for Compound 44**

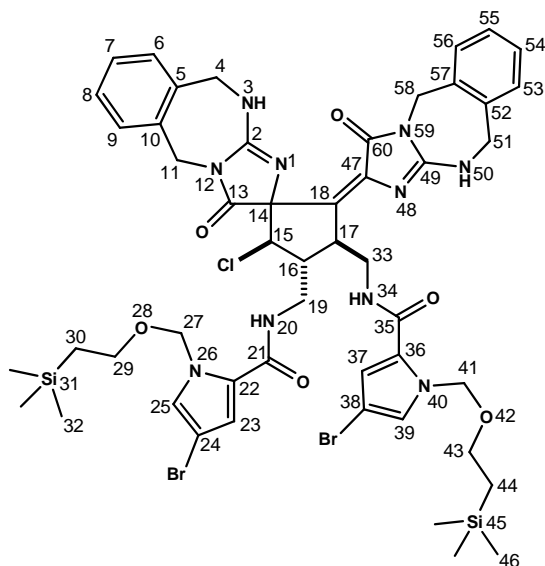

| Proton No. | <sup>1</sup> H<br>δ (ppm) (mult J (Hz)) <sup>a,b</sup> | COSY Correlation <sup>c</sup> |
|------------|--------------------------------------------------------|-------------------------------|
| H-1        |                                                        |                               |
| H-4a       | 4.56 (d, 14.8)                                         | H-4b                          |
| H-4b       | 4.38 (d, 15.0)                                         | H-4a                          |
| H-6        |                                                        |                               |
| H-7        |                                                        |                               |
| H-8        |                                                        |                               |
| H-9        |                                                        |                               |
| H-11       | 4.92 (s)                                               |                               |
| H-15       | 4.01 (d, 11.6)                                         | H-16                          |
| H-16       | 2.32-2.25 (m)                                          | H-15, H-17, H-19b             |

|       |                            |                    |
|-------|----------------------------|--------------------|
| H-17  | 3.13 (ddd, 8.8, 4.1, 4.1)  | H-16, H-33a, H-33b |
| H-19a | 3.65 (ddd, 14.3, 6.0, 4.3) | H-19b              |
| H-19b | 3.49-3.38 (m)              | H-19a              |
| H-20  | 7.42-7.36 (m)              | H-19a, H-19b       |
| H-23  | 6.75 (d, 1.9)              | H-25               |
| H-25  | 7.02 (d, 1.9)              | H-23               |
| H-27a | 5.61 (d, 10.3)             |                    |
| H-27b | 5.56 (d, 10.3)             |                    |
| H-29  | 3.49-3.38 (m)              | H-30               |
| H-30  | 0.79 (t, 2.0)              | H-29               |
| H-32  | -0.14 (s)                  |                    |
| H-33a | 3.77 (ddd, 13.1, 4.1, 4.1) | H-33b              |
| H-33b | 3.49-3.38 (m)              | H-33a              |
| H-34  | 8.15 (s)                   | H-33a, H-33b       |
| H-37  | 6.83 (d, 1.7)              | H-39               |
| H-39  | 7.00 (d, 1.9)              | H-37               |
| H-41a | 5.59 (d, 10.3)             |                    |
| H-41b | 5.58 (d, 10.3)             |                    |
| H-43  | 3.49-3.38 (m)              | H-44               |
| H-44  | 0.77-0.71 (m)              | H-43               |
| H-46  |                            |                    |
| H-48  |                            |                    |
| H-51a | 4.49 (d, 15.0)             | H-51b              |
| H-51b | 4.38 (d, 15.0)             | H-51a              |
| H-53  |                            |                    |
| H-54  |                            |                    |
| H-55  |                            |                    |
| H-56  |                            |                    |
| H-58a | 4.73 (s, 2H)               |                    |

<sup>a</sup> Recorded at 500 MHz.

<sup>b</sup> Assignments are based on HMQC and HMBC data.

<sup>c</sup> Only those correlations that could be unambiguously assigned are recorded.

**Table 4: ROESY Data for Compound 44**

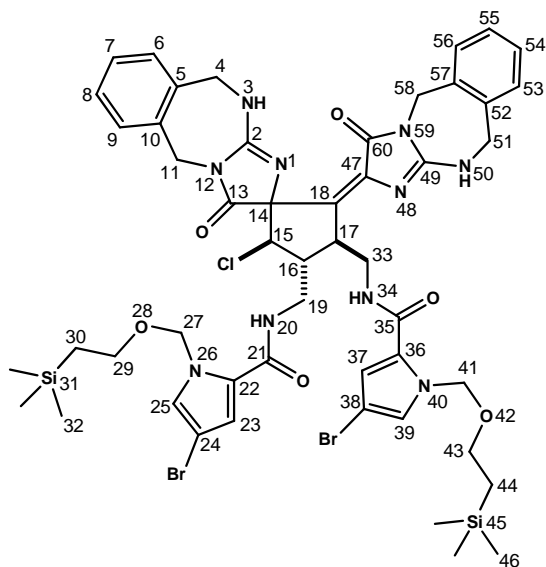

| Proton No. | <sup>1</sup> H<br>δ (ppm) (mult J (Hz)) <sup>a,b</sup> | ROESY Correlation <sup>c</sup>               |
|------------|--------------------------------------------------------|----------------------------------------------|
| H-1        |                                                        |                                              |
| H-4a       | 4.56 (d, 14.8)                                         |                                              |
| H-4b       | 4.38 (d, 15.0)                                         |                                              |
| H-6        |                                                        |                                              |
| H-7        |                                                        |                                              |
| H-8        |                                                        |                                              |
| H-9        |                                                        | H-11                                         |
| H-11       | 4.92 (s)                                               | H-9, H-4a, H-4b                              |
| H-15       | 4.01 (d, 11.6)                                         | H-16, H-17, H-19a, H-19b                     |
| H-16       | 2.32-2.25 (m)                                          | H-15, H-17, H-19a, H-19b, H-33a, H-33b, H-34 |
| H-17       | 3.13 (ddd, 8.8, 4.1, 4.1)                              | H-15, H-16, H-19b, H-33a, H-33b              |
| H-19a      | 3.65 (ddd, 14.3, 6.0, 4.3)                             | H-15, H-16, H-17, H-19b                      |
| H-19b      | 3.49-3.38 (m)                                          | H-19a                                        |
| H-20       | 7.42-7.36 (m)                                          |                                              |
| H-23       | 6.75 (d, 1.9)                                          | H-25                                         |
| H-25       | 7.02 (d, 1.9)                                          | H-23                                         |
| H-27a      | 5.61 (d, 10.3)                                         |                                              |
| H-27b      | 5.56 (d, 10.3)                                         |                                              |
| H-29       | 3.49-3.38 (m)                                          |                                              |
| H-30       | 0.79 (t, 2.0)                                          |                                              |
| H-32       | -0.14 (s)                                              |                                              |
| H-33a      | 3.77 (ddd, 13.1, 4.1, 4.1)                             | H-16, H-17, H-33b, H-34                      |
| H-33b      | 3.49-3.38 (m)                                          | H-33a                                        |
| H-34       | 8.15 (s)                                               | H-37                                         |
| H-37       | 6.83 (d, 1.7)                                          | H-39                                         |
| H-39       | 7.00 (d, 1.9)                                          | H-37                                         |
| H-41a      | 5.59 (d, 10.3)                                         | H-39                                         |
| H-41b      | 5.58 (d, 10.3)                                         | H-39                                         |
| H-43       | 3.49-3.38 (m)                                          |                                              |
| H-44       | 0.77-0.71 (m)                                          | H-43                                         |
| H-46       |                                                        |                                              |
| H-48       |                                                        |                                              |
| H-51a      | 4.49 (d, 15.0)                                         |                                              |
| H-51b      | 4.38 (d, 15.0)                                         |                                              |



H-53

H-54

H-55

H-56

H-58 4.73 (s, 2H)

H-51a, H-51b, H-56

<sup>a</sup> Recorded at 400 MHz.

<sup>b</sup> Assignments based on COSY, HMQC and HMBC data.

<sup>c</sup> Only those correlations which could be unambiguously assigned are recorded.

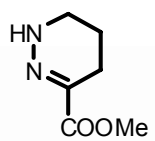

**D**

Solvent: CDCl<sub>3</sub>

400 MHz

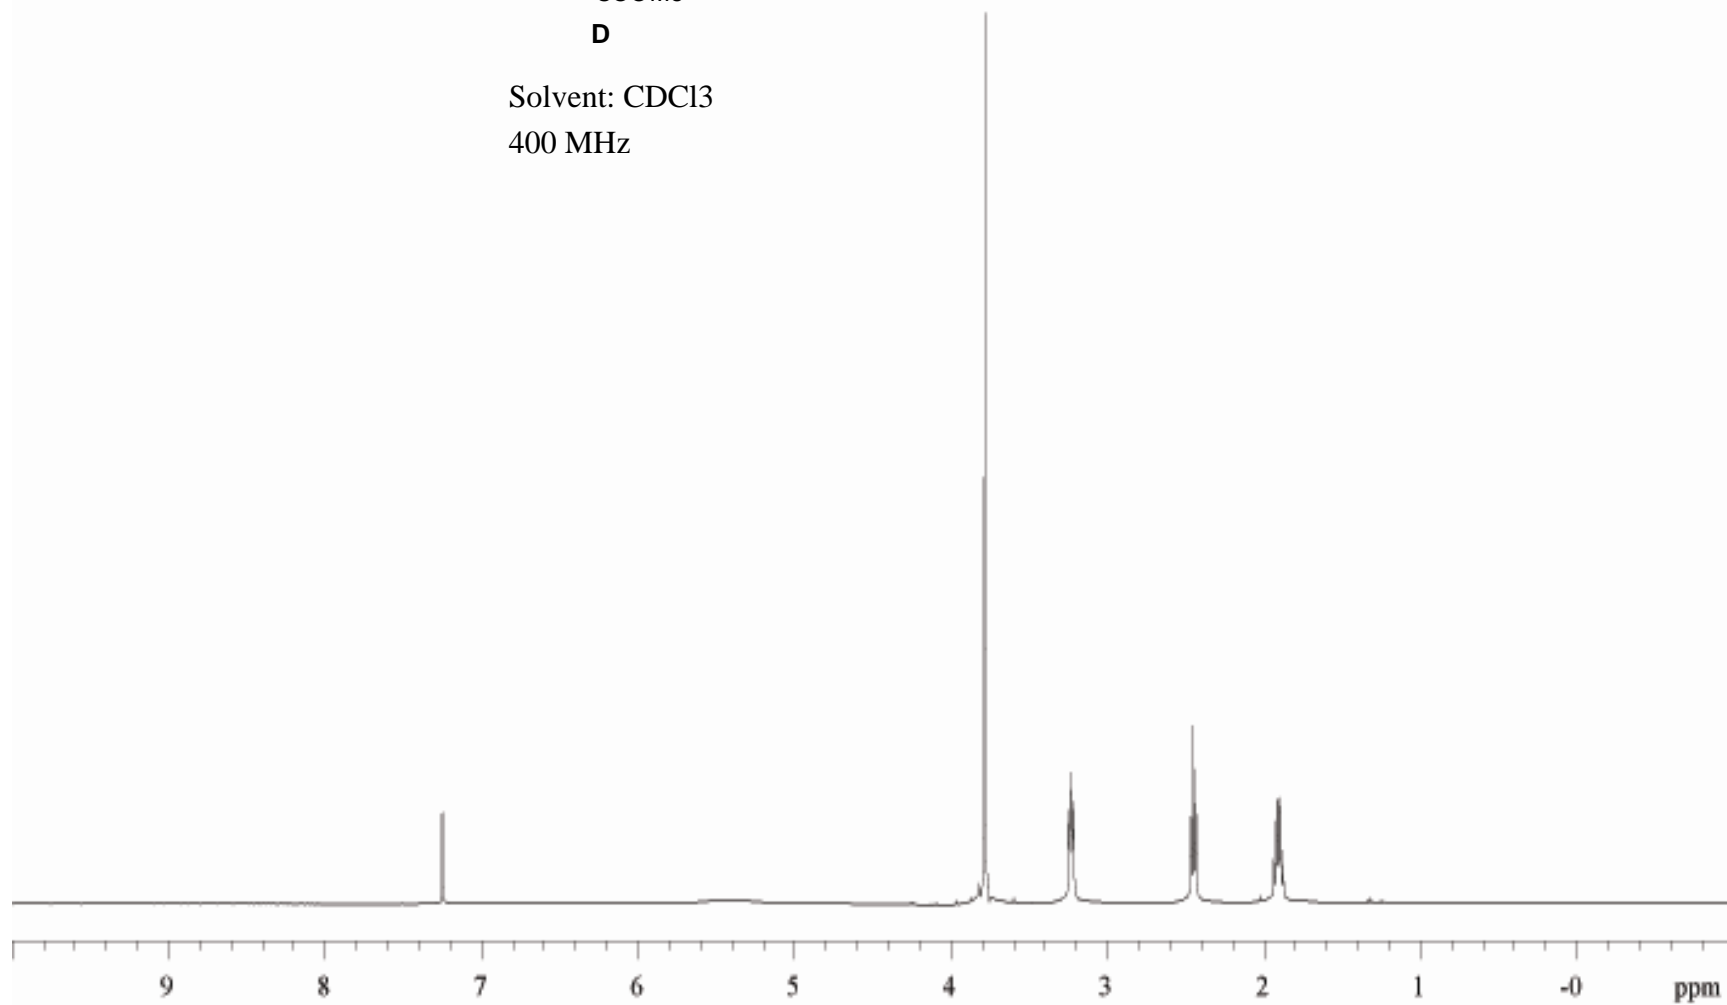

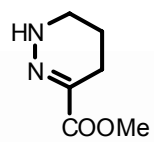

**D**

Solvent: CDCl<sub>3</sub>

100 MHz

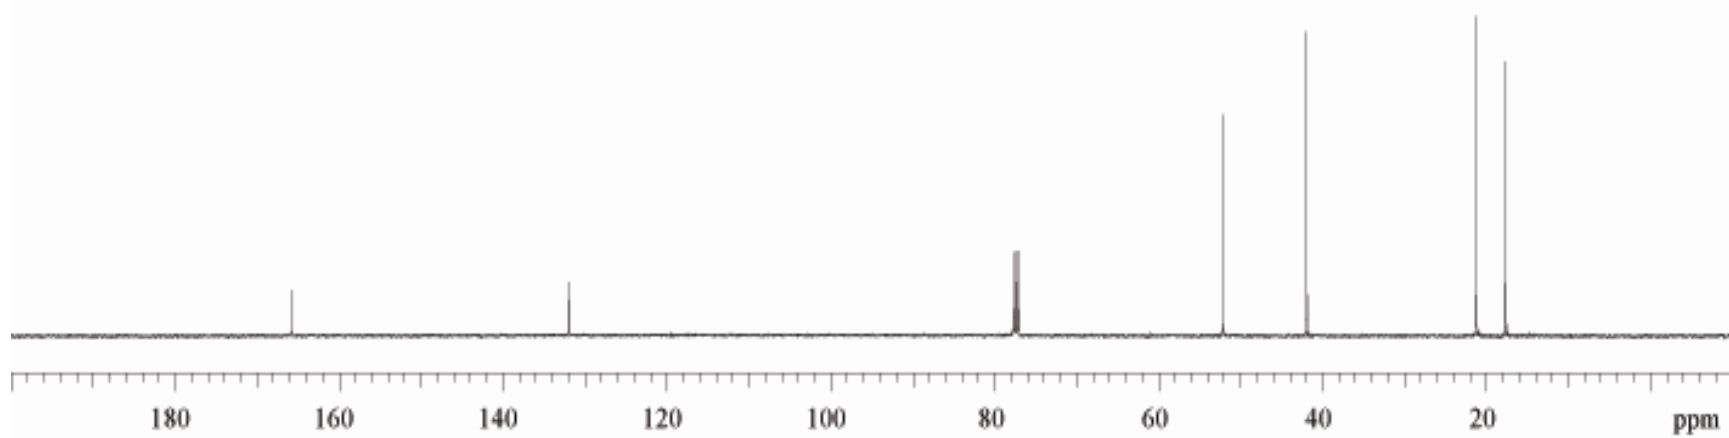

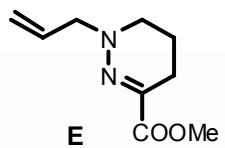

Solvent: CDCl<sub>3</sub>  
400 MHz

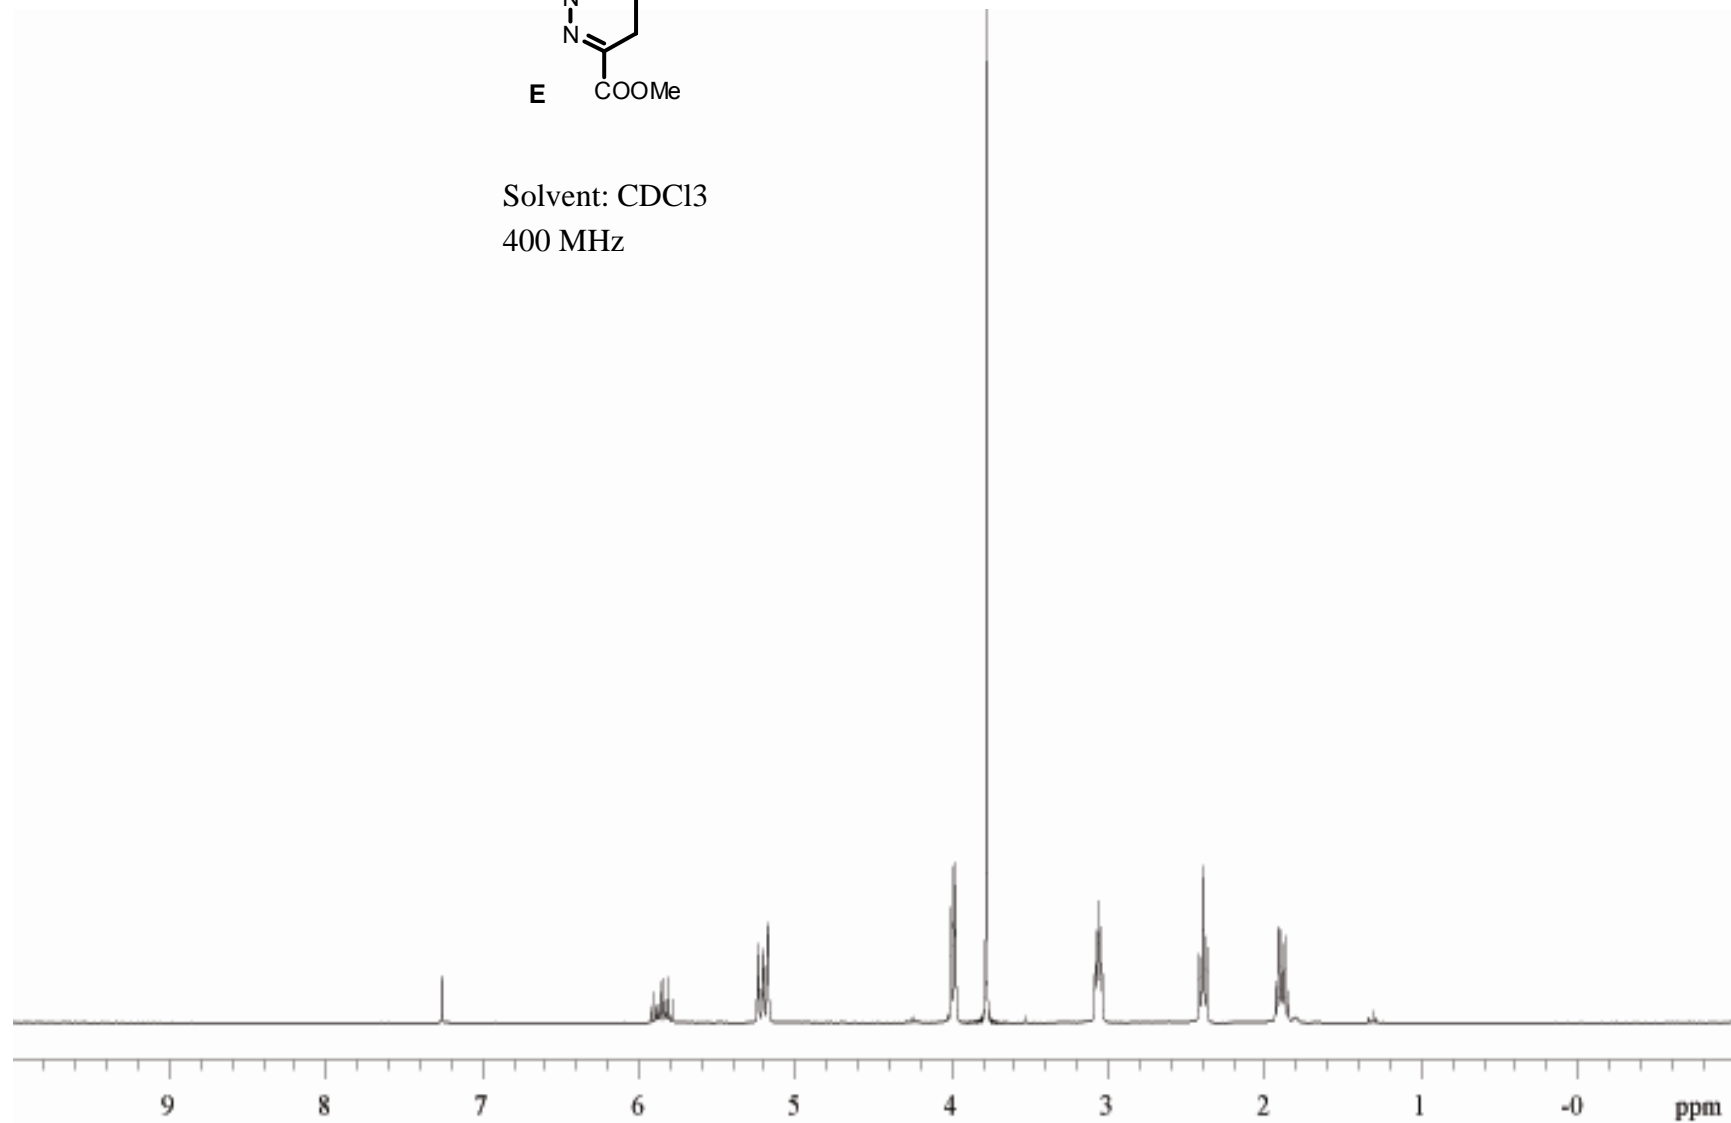

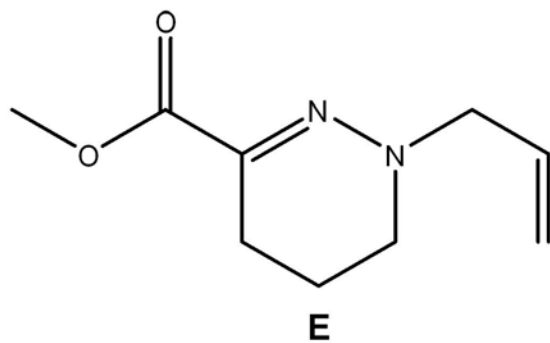

Solvent: CDCl<sub>3</sub>  
100 MHz

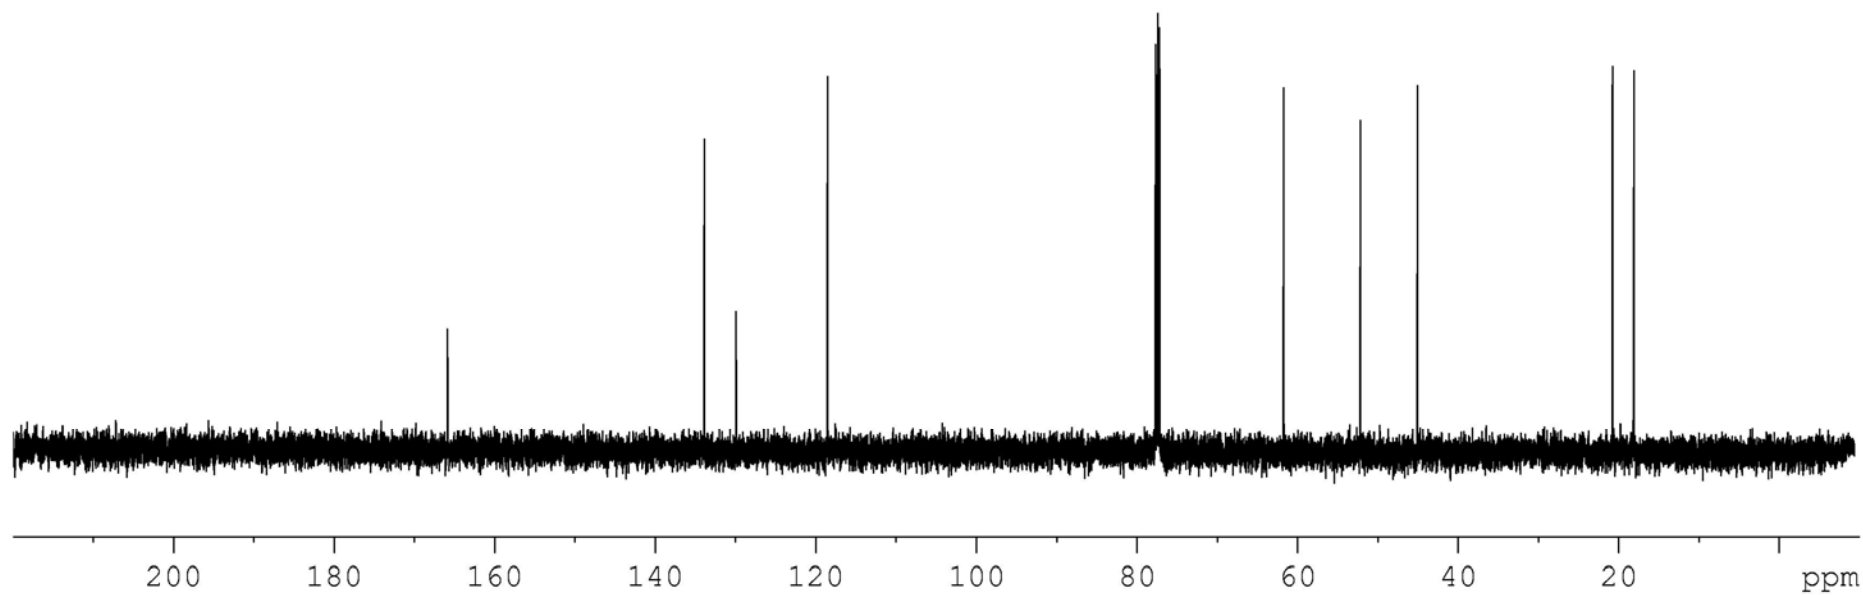

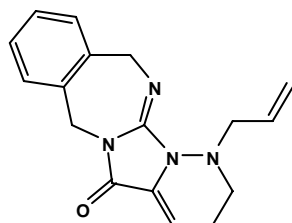

**11**

Solvent: DMSO-d<sub>6</sub>  
Temp: 25 °C; 500 MHz

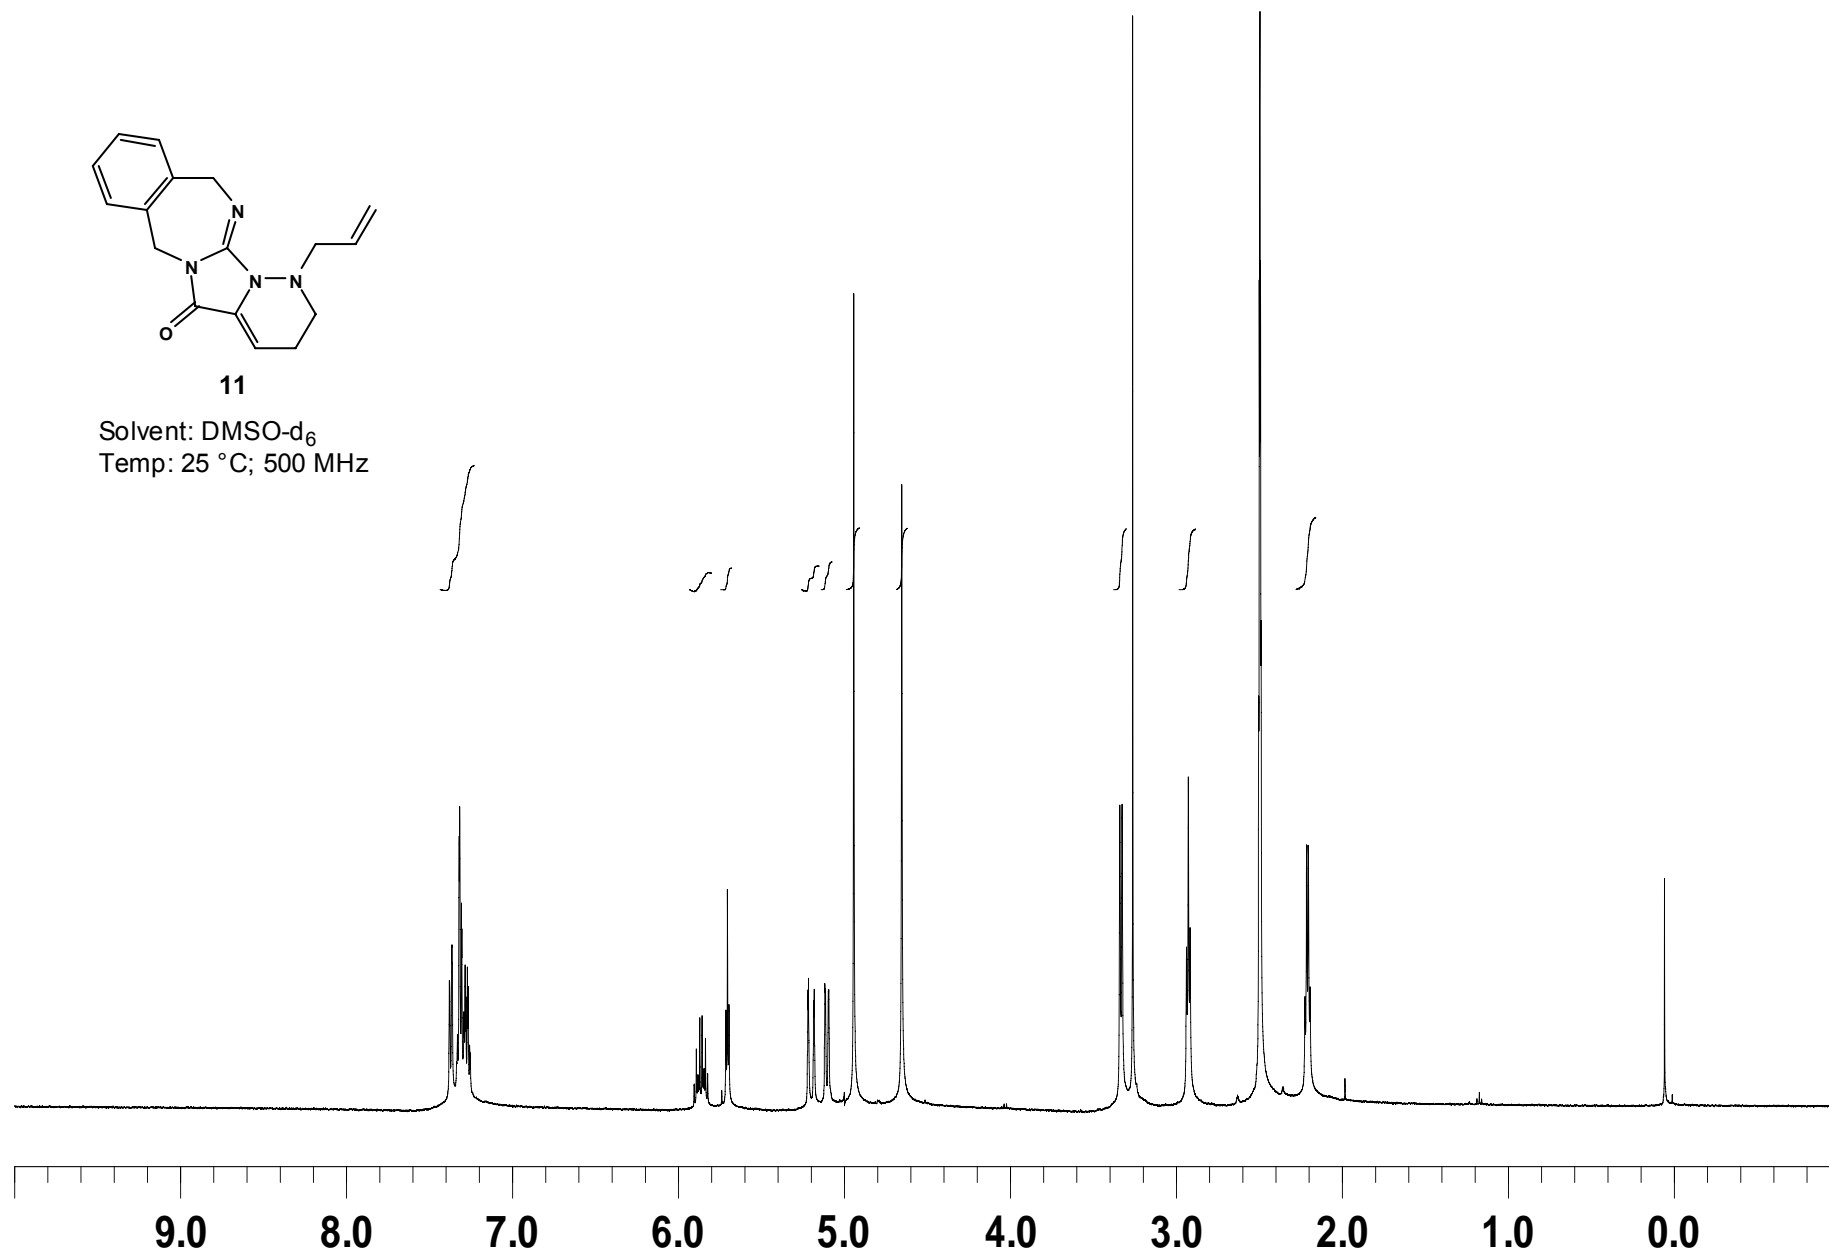

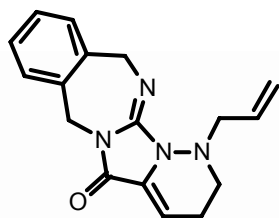

11

Solvent: DMSO-d6

400 MHz

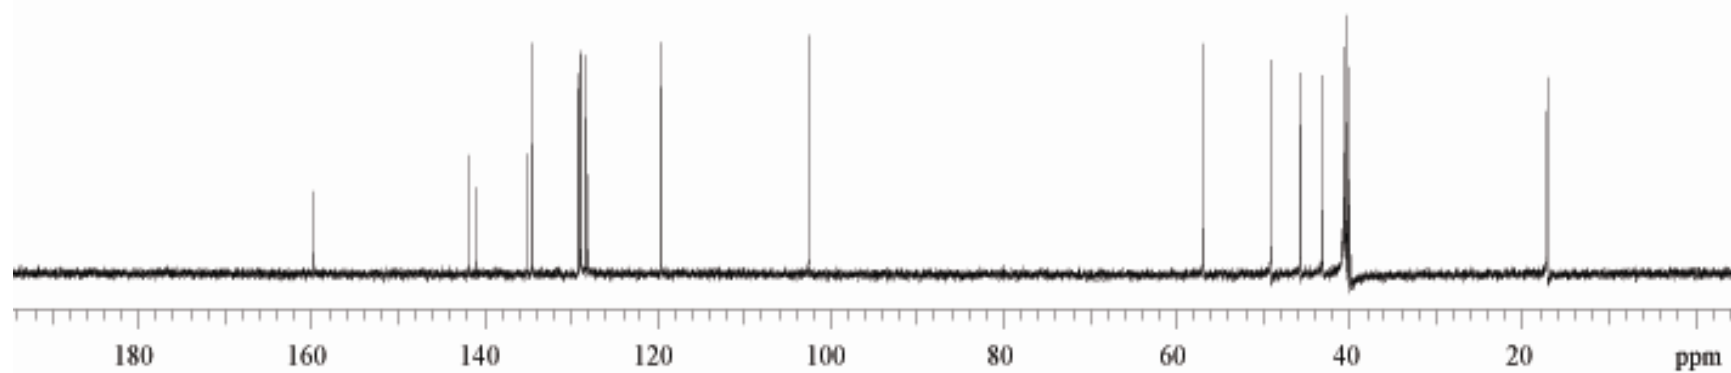

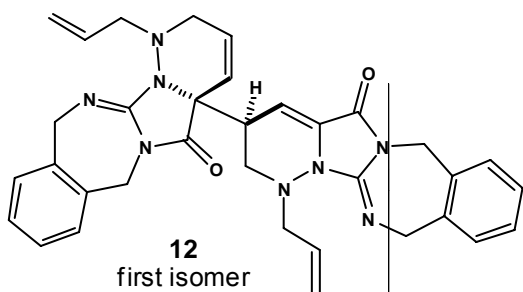

Solvent: CD<sub>3</sub>CN  
Temp: 25 °C; 400 MHz

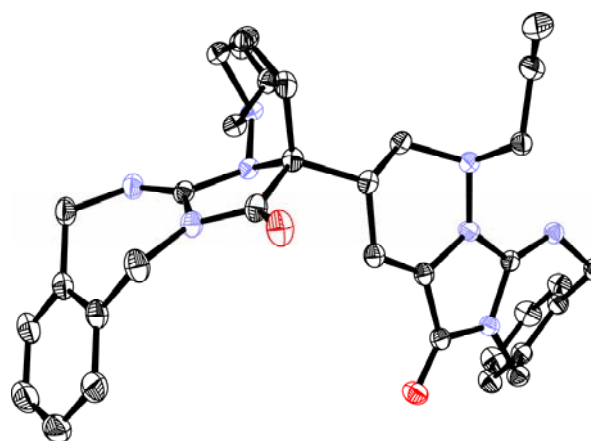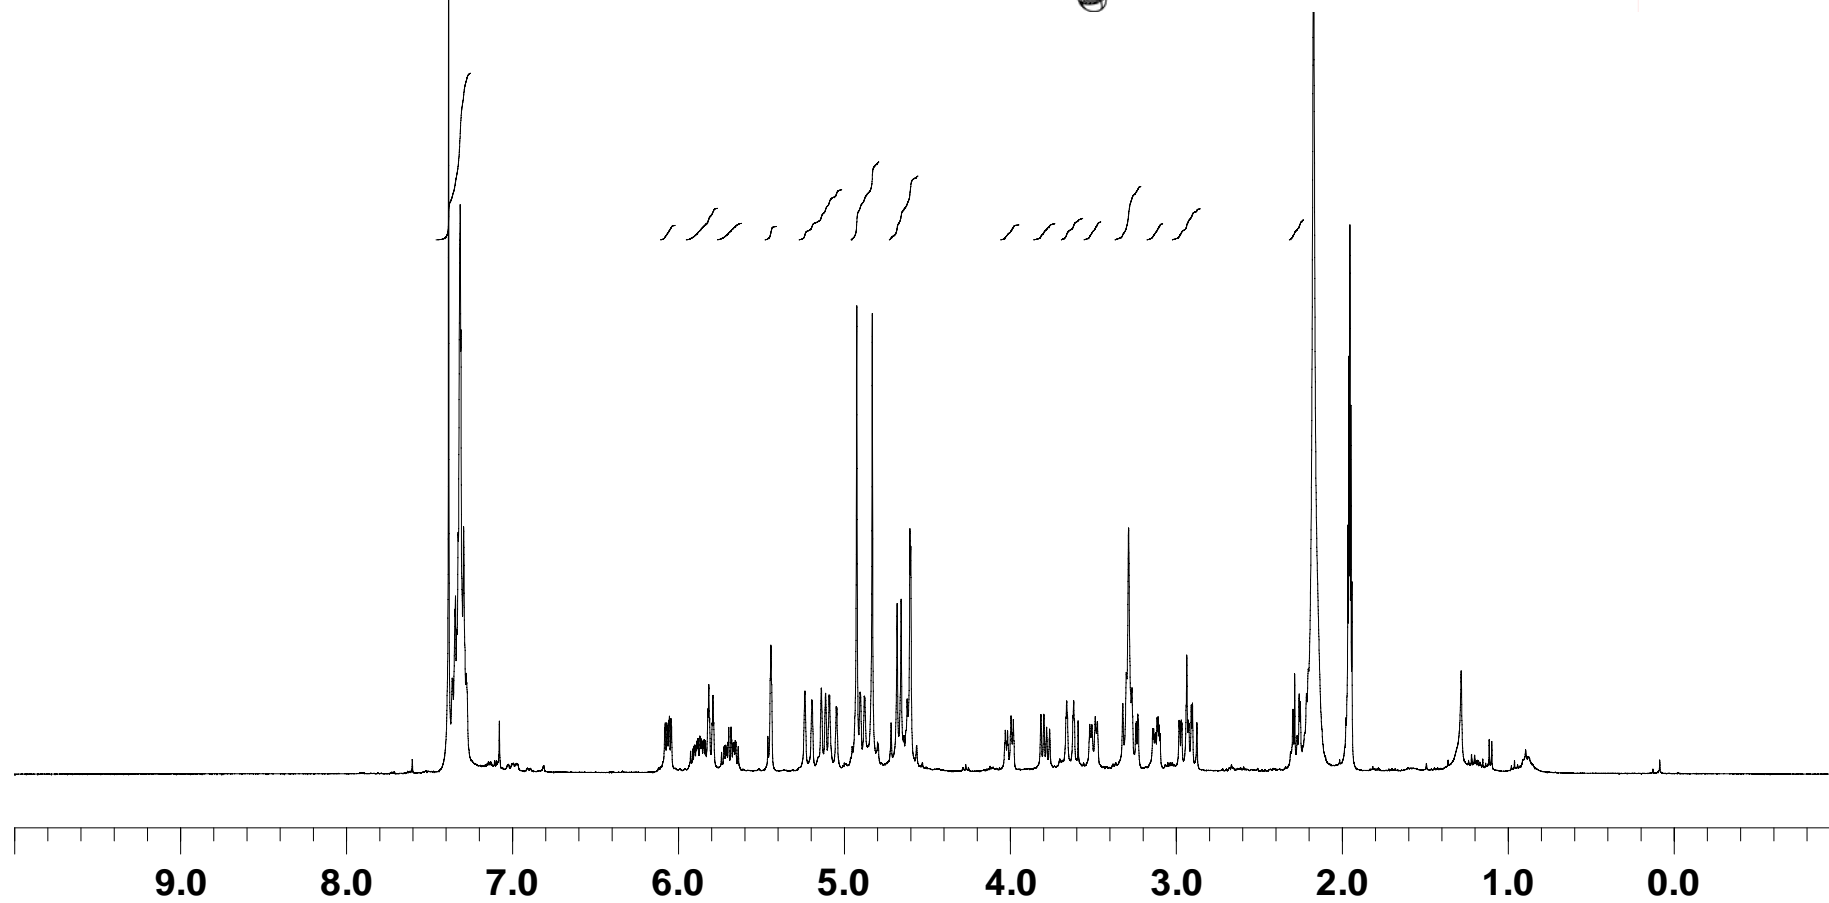



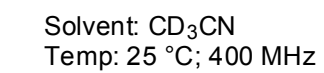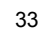

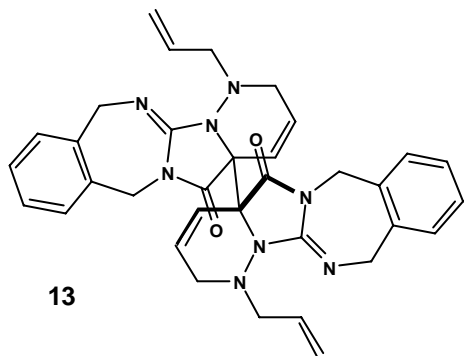

Solvent: DMSO-d<sub>6</sub>  
Temp: 25 °C; 500 MHz

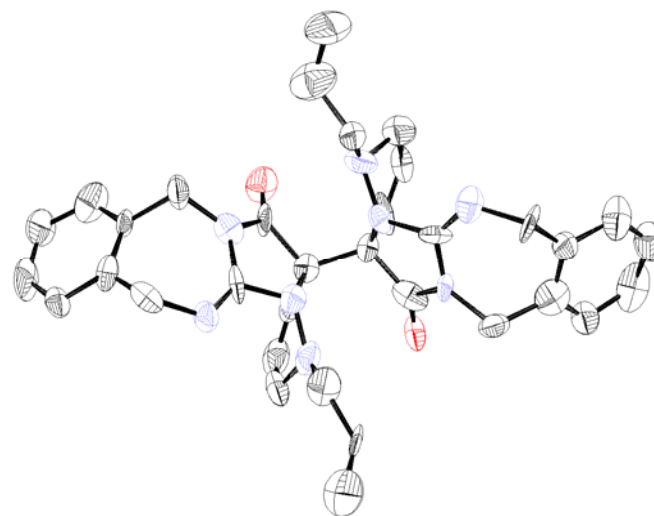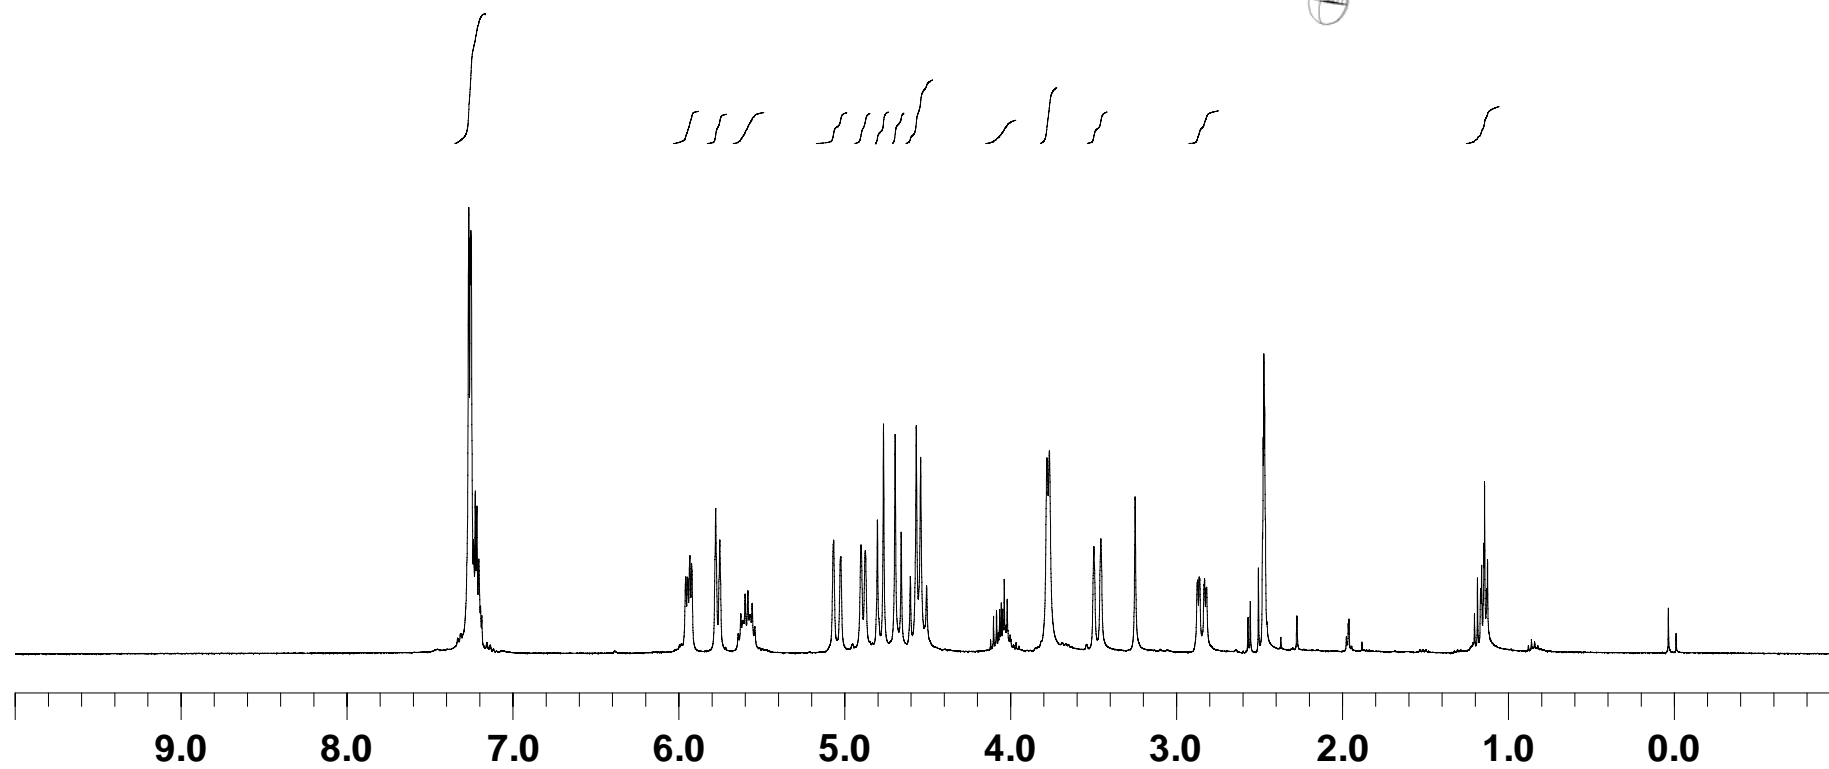

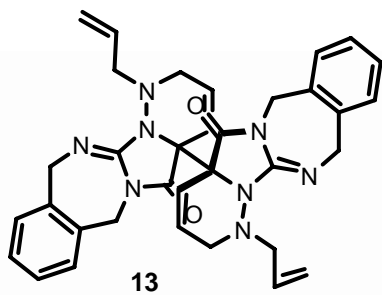

Solvent: DMSO-d<sub>6</sub>  
400 MHz

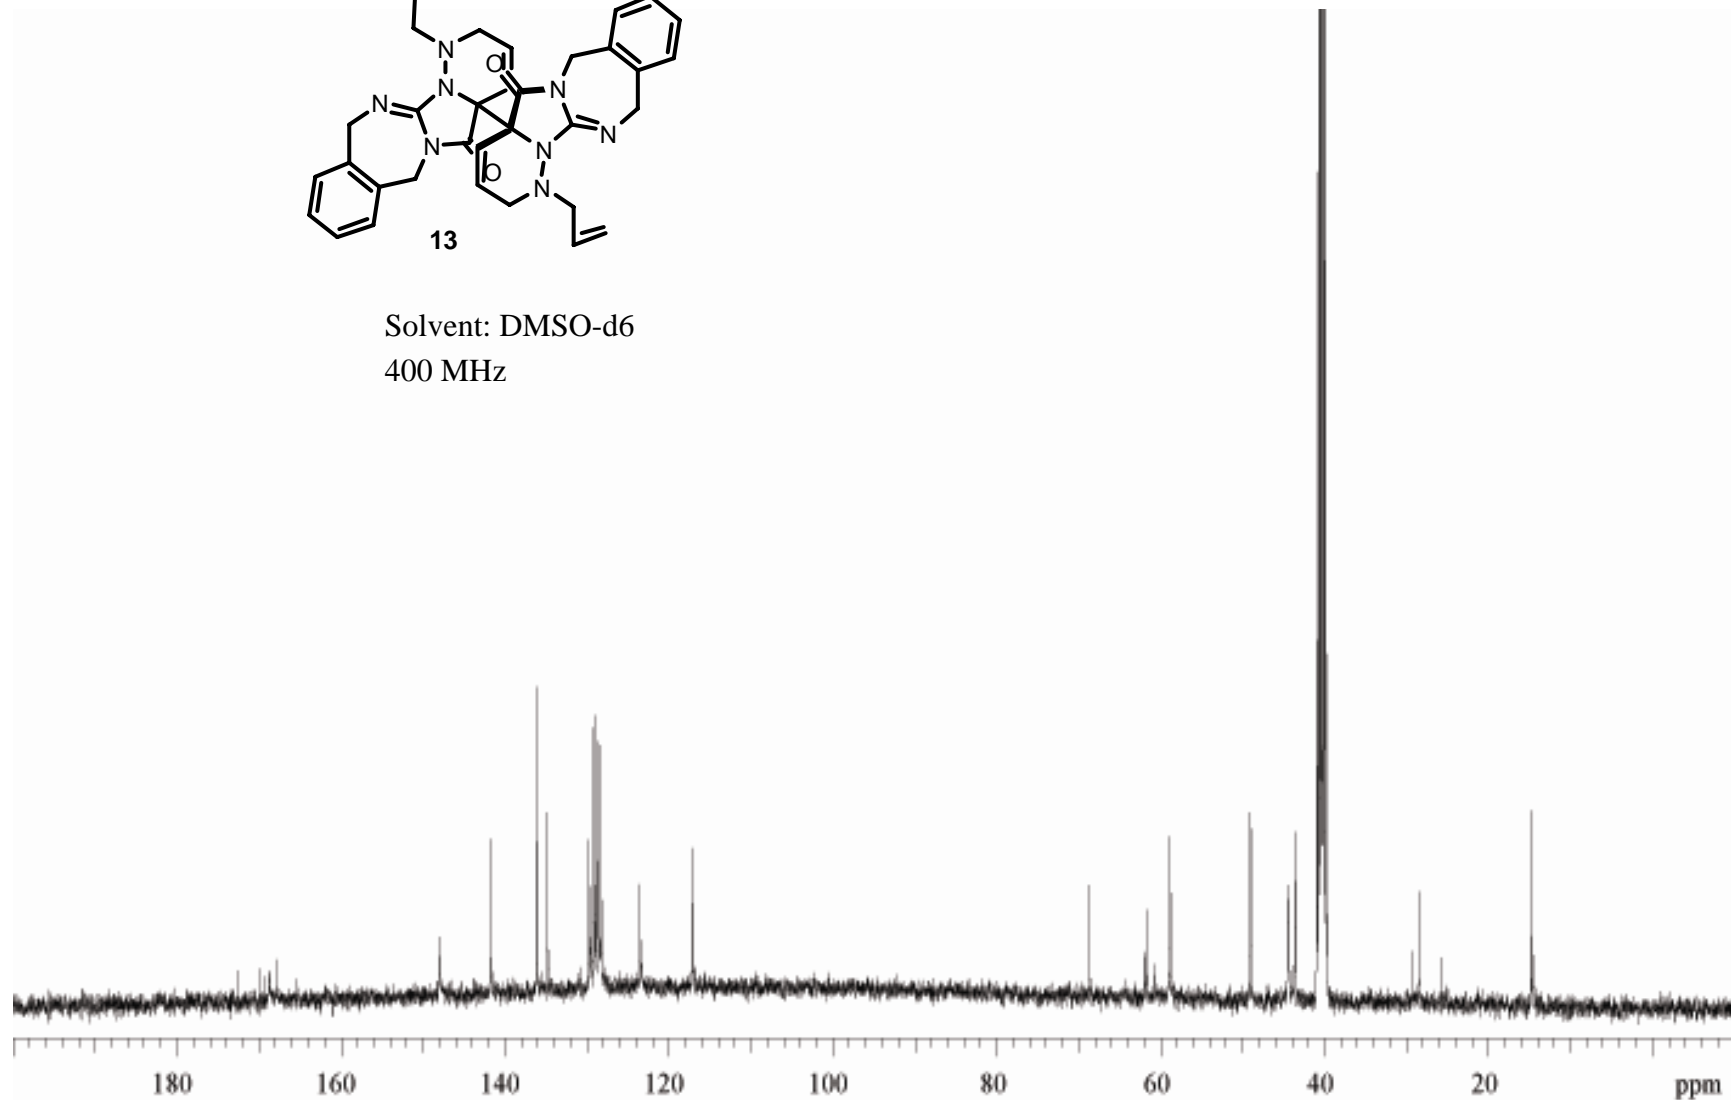

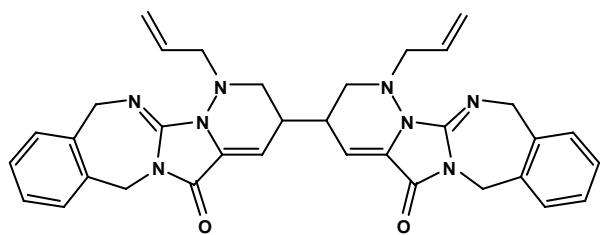

**14a/b**

Solvent:  $\text{CDCl}_3$

Temp: 25 °C; 300 MHz

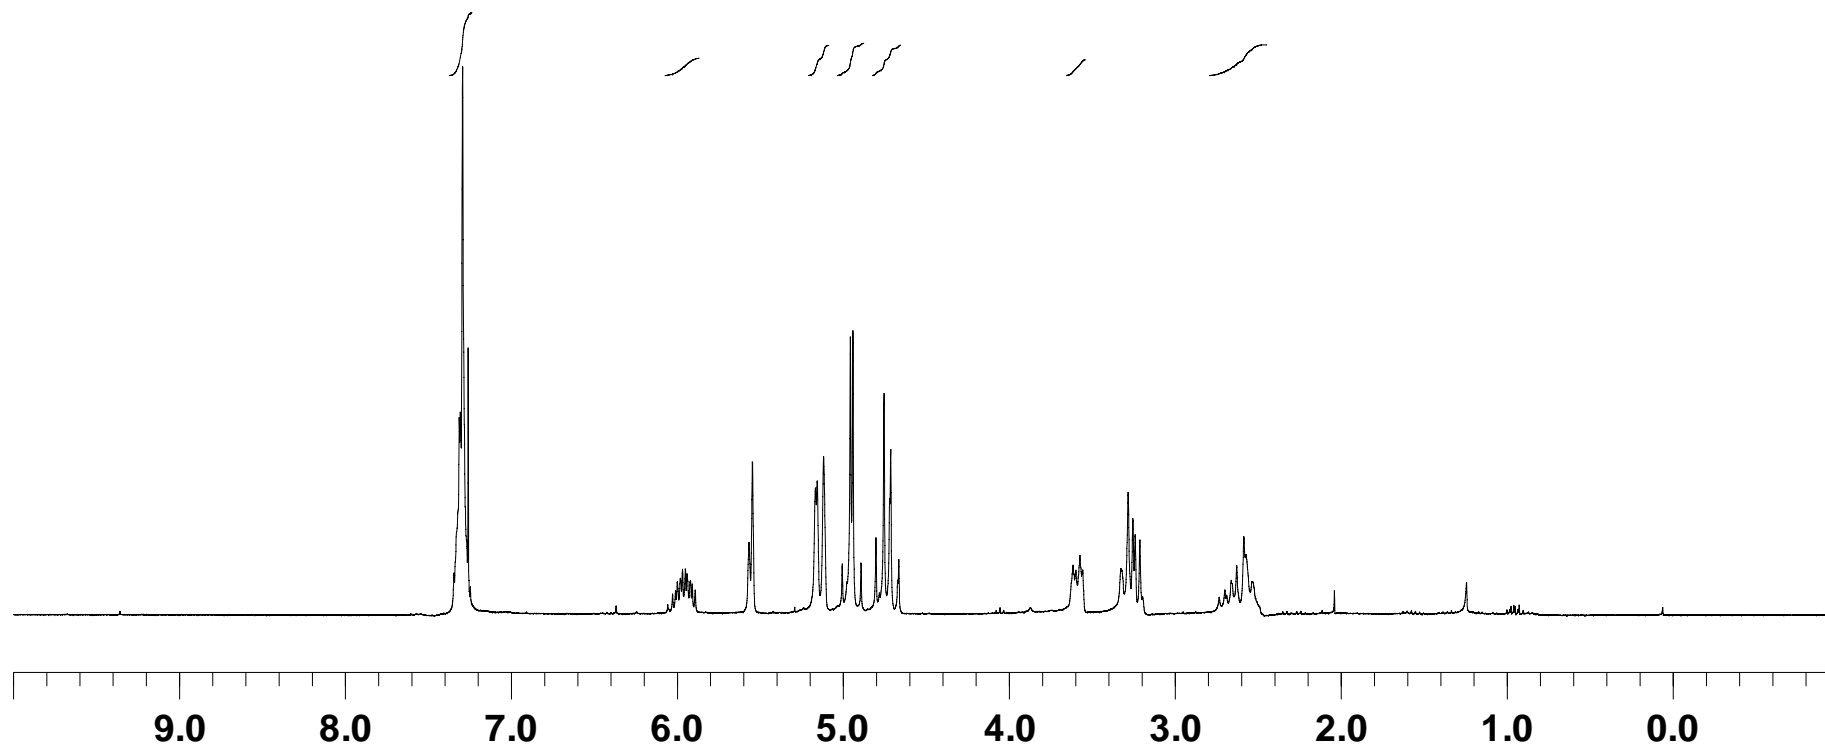

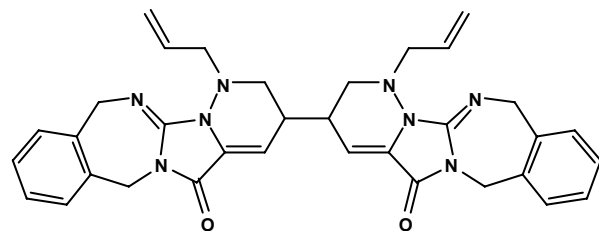

**14a/b**

Solvent: CDCl<sub>3</sub>  
 Temp: 25 °C; 75 MHz  
<sup>13</sup>C APT

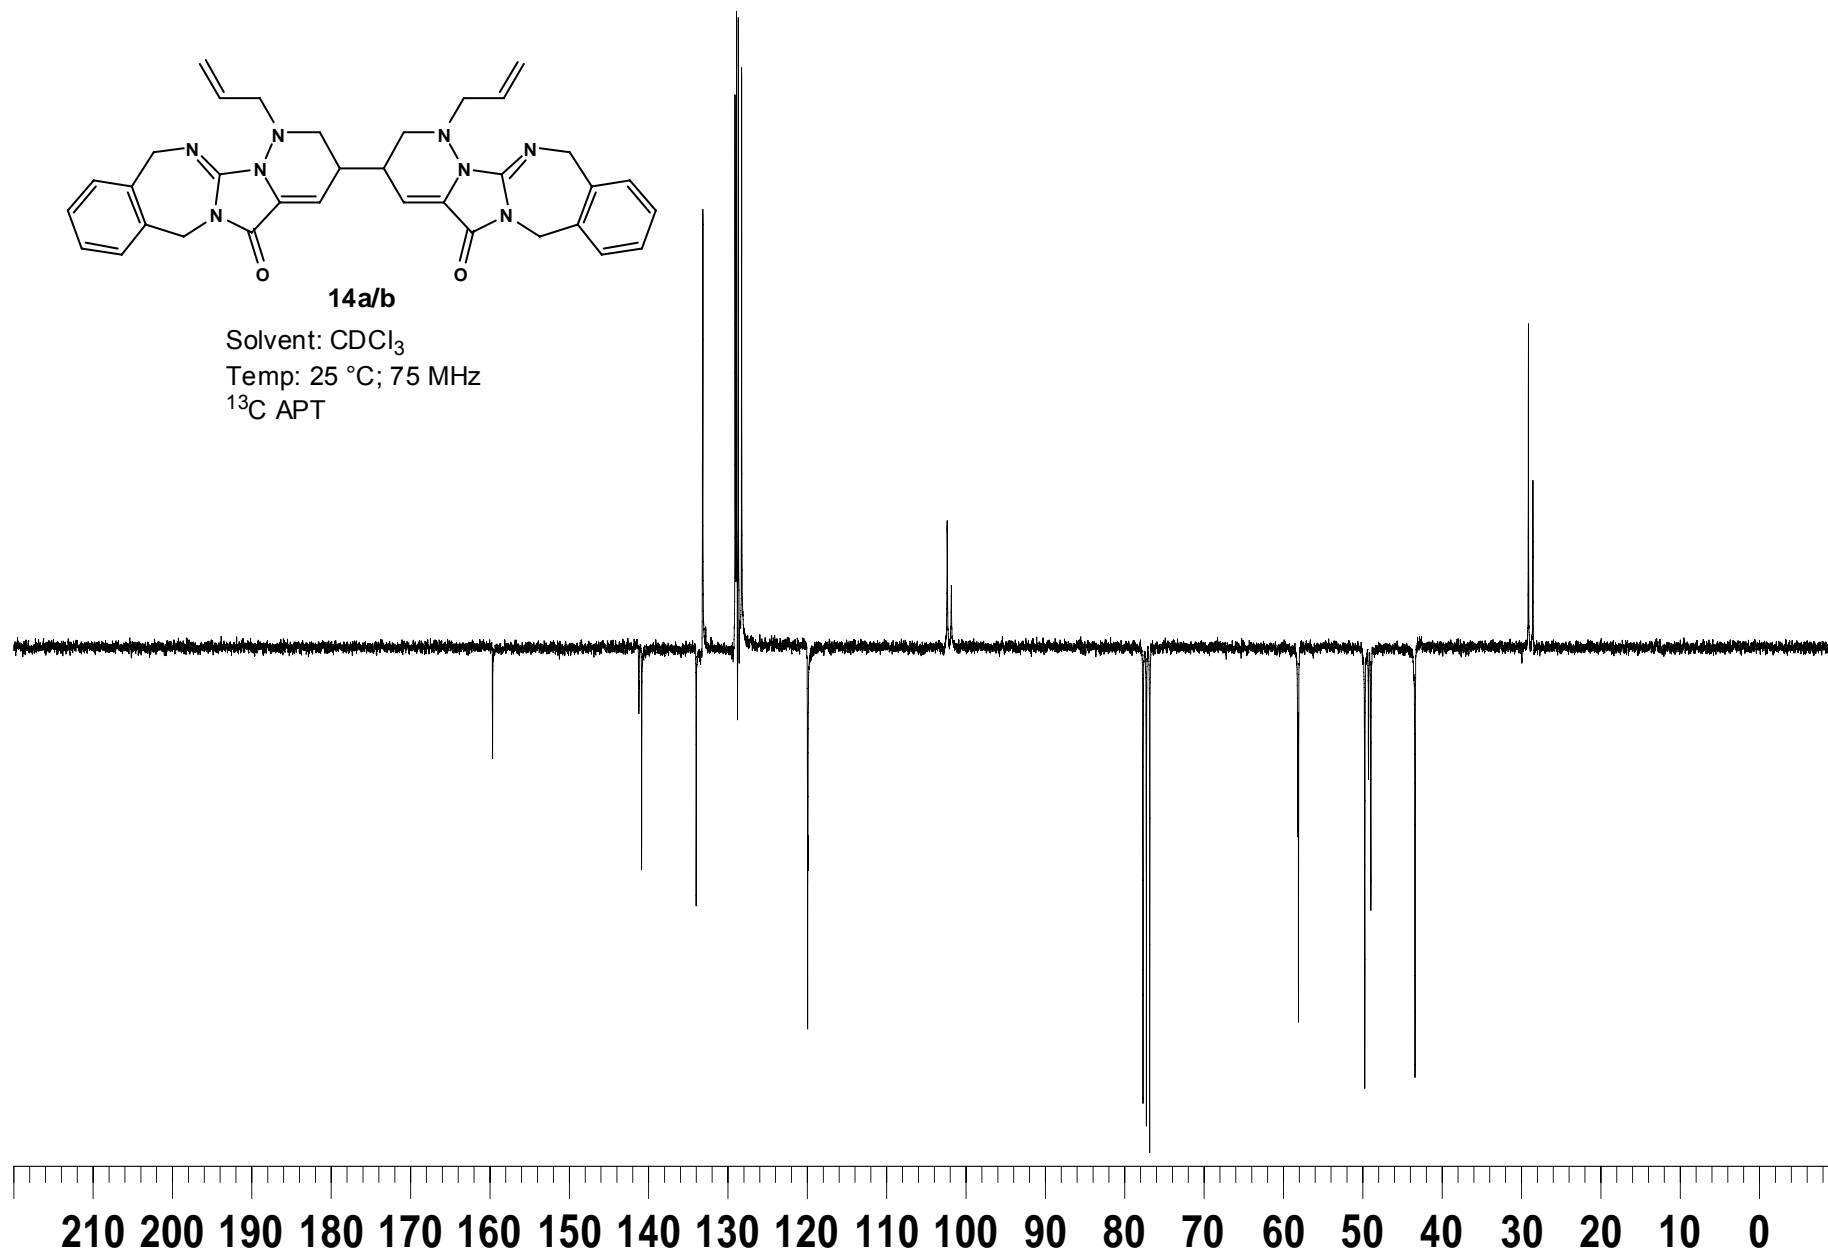

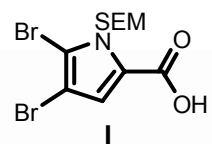

Solvent: CDCl<sub>3</sub>

400 MHz

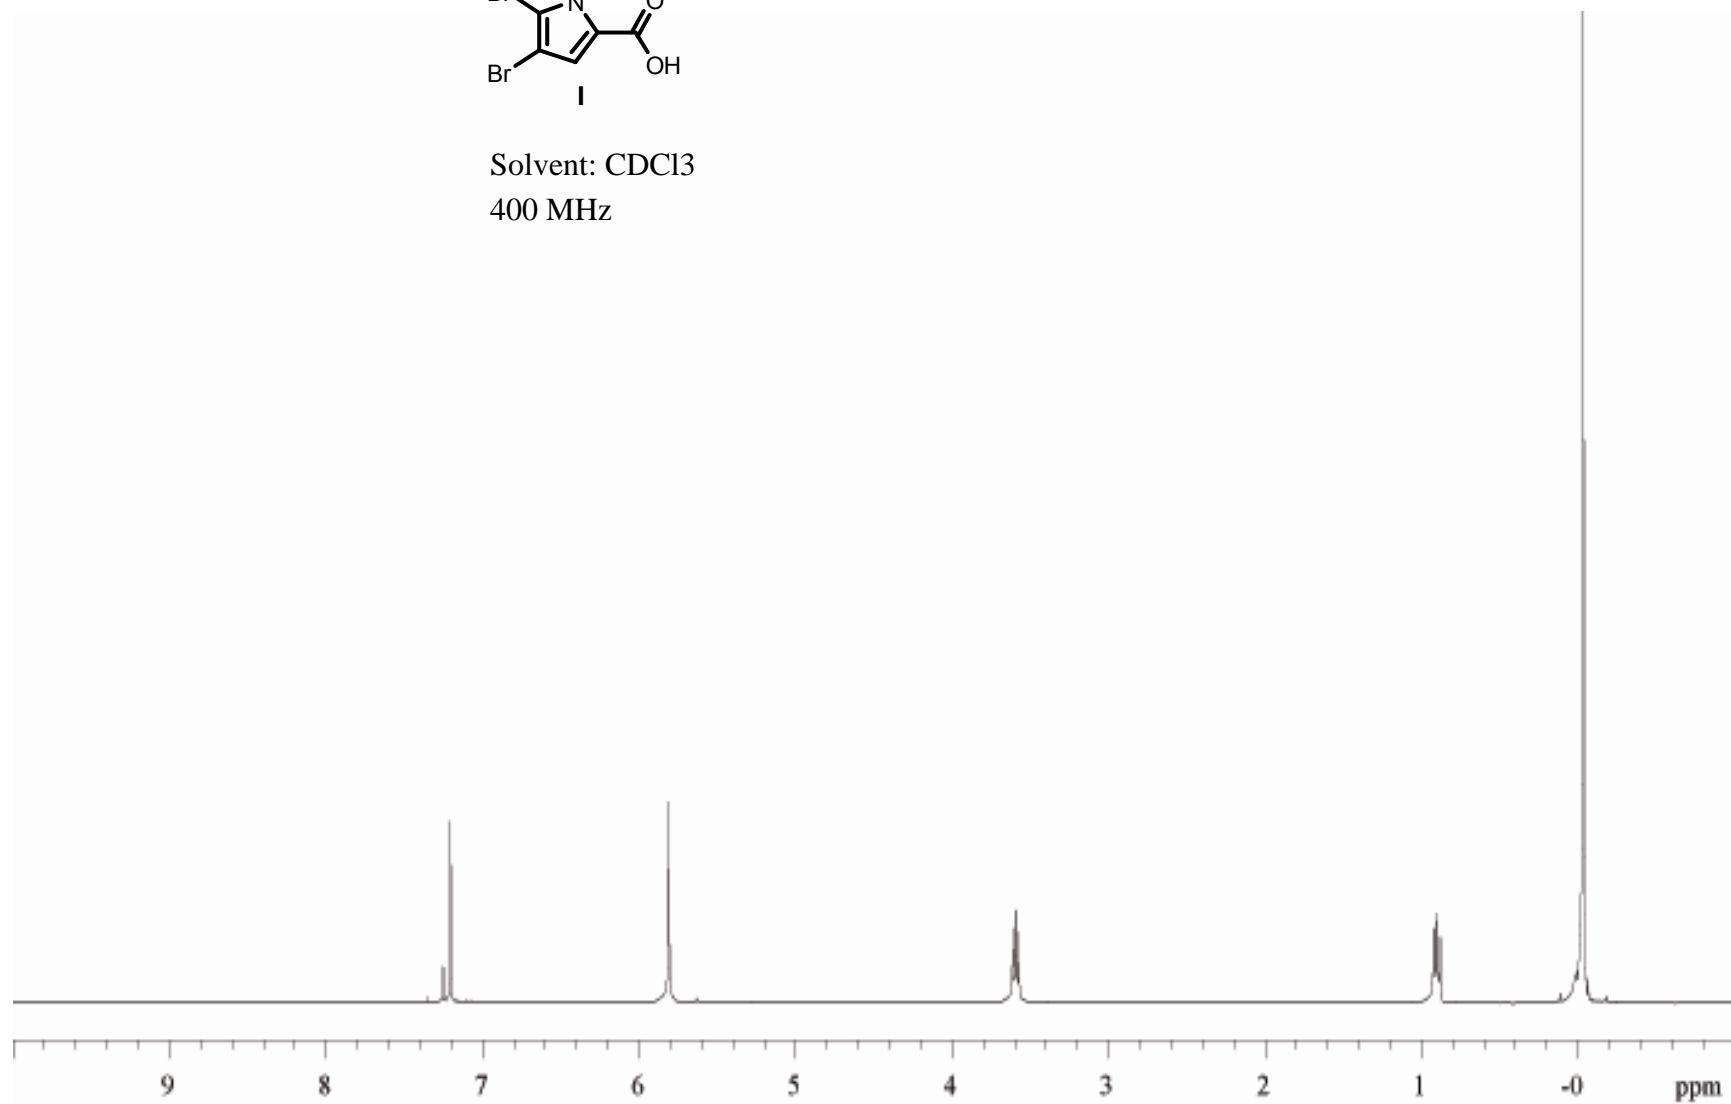

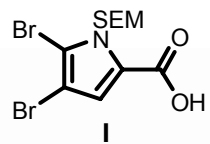

Solvent: CDCl<sub>3</sub>

75 MHz

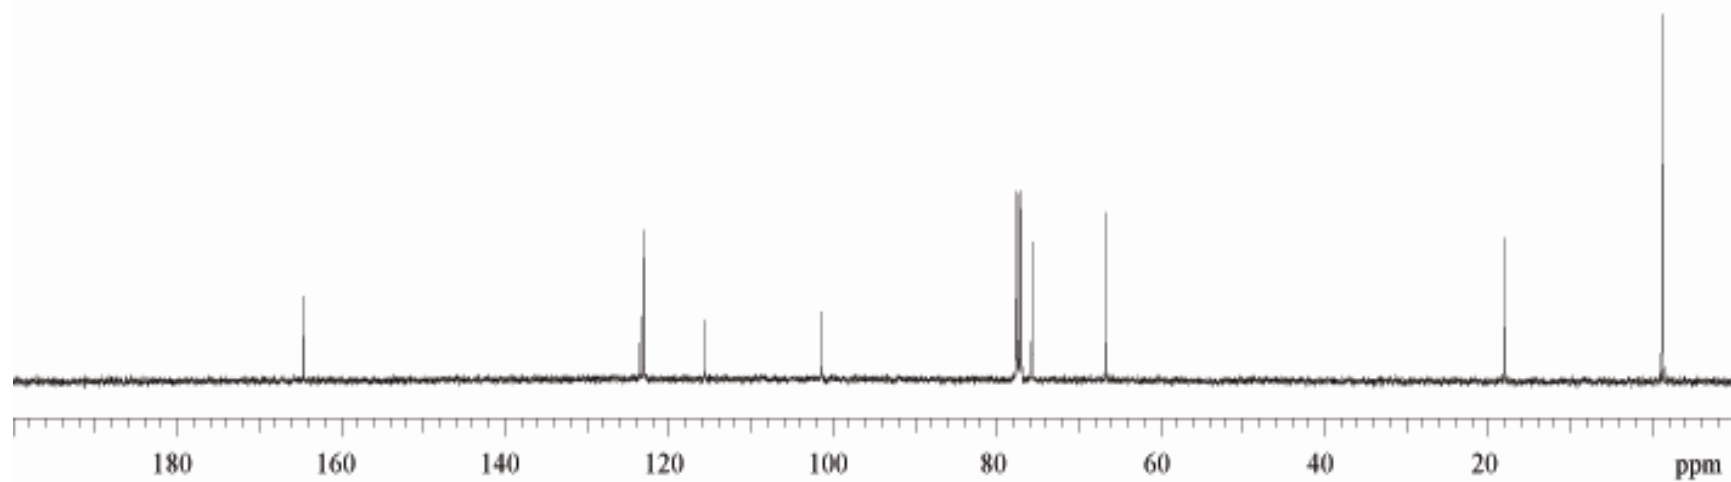

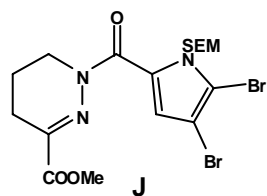

Solvent:  $\text{CDCl}_3$   
Temp: 25 °C; 400 MHz

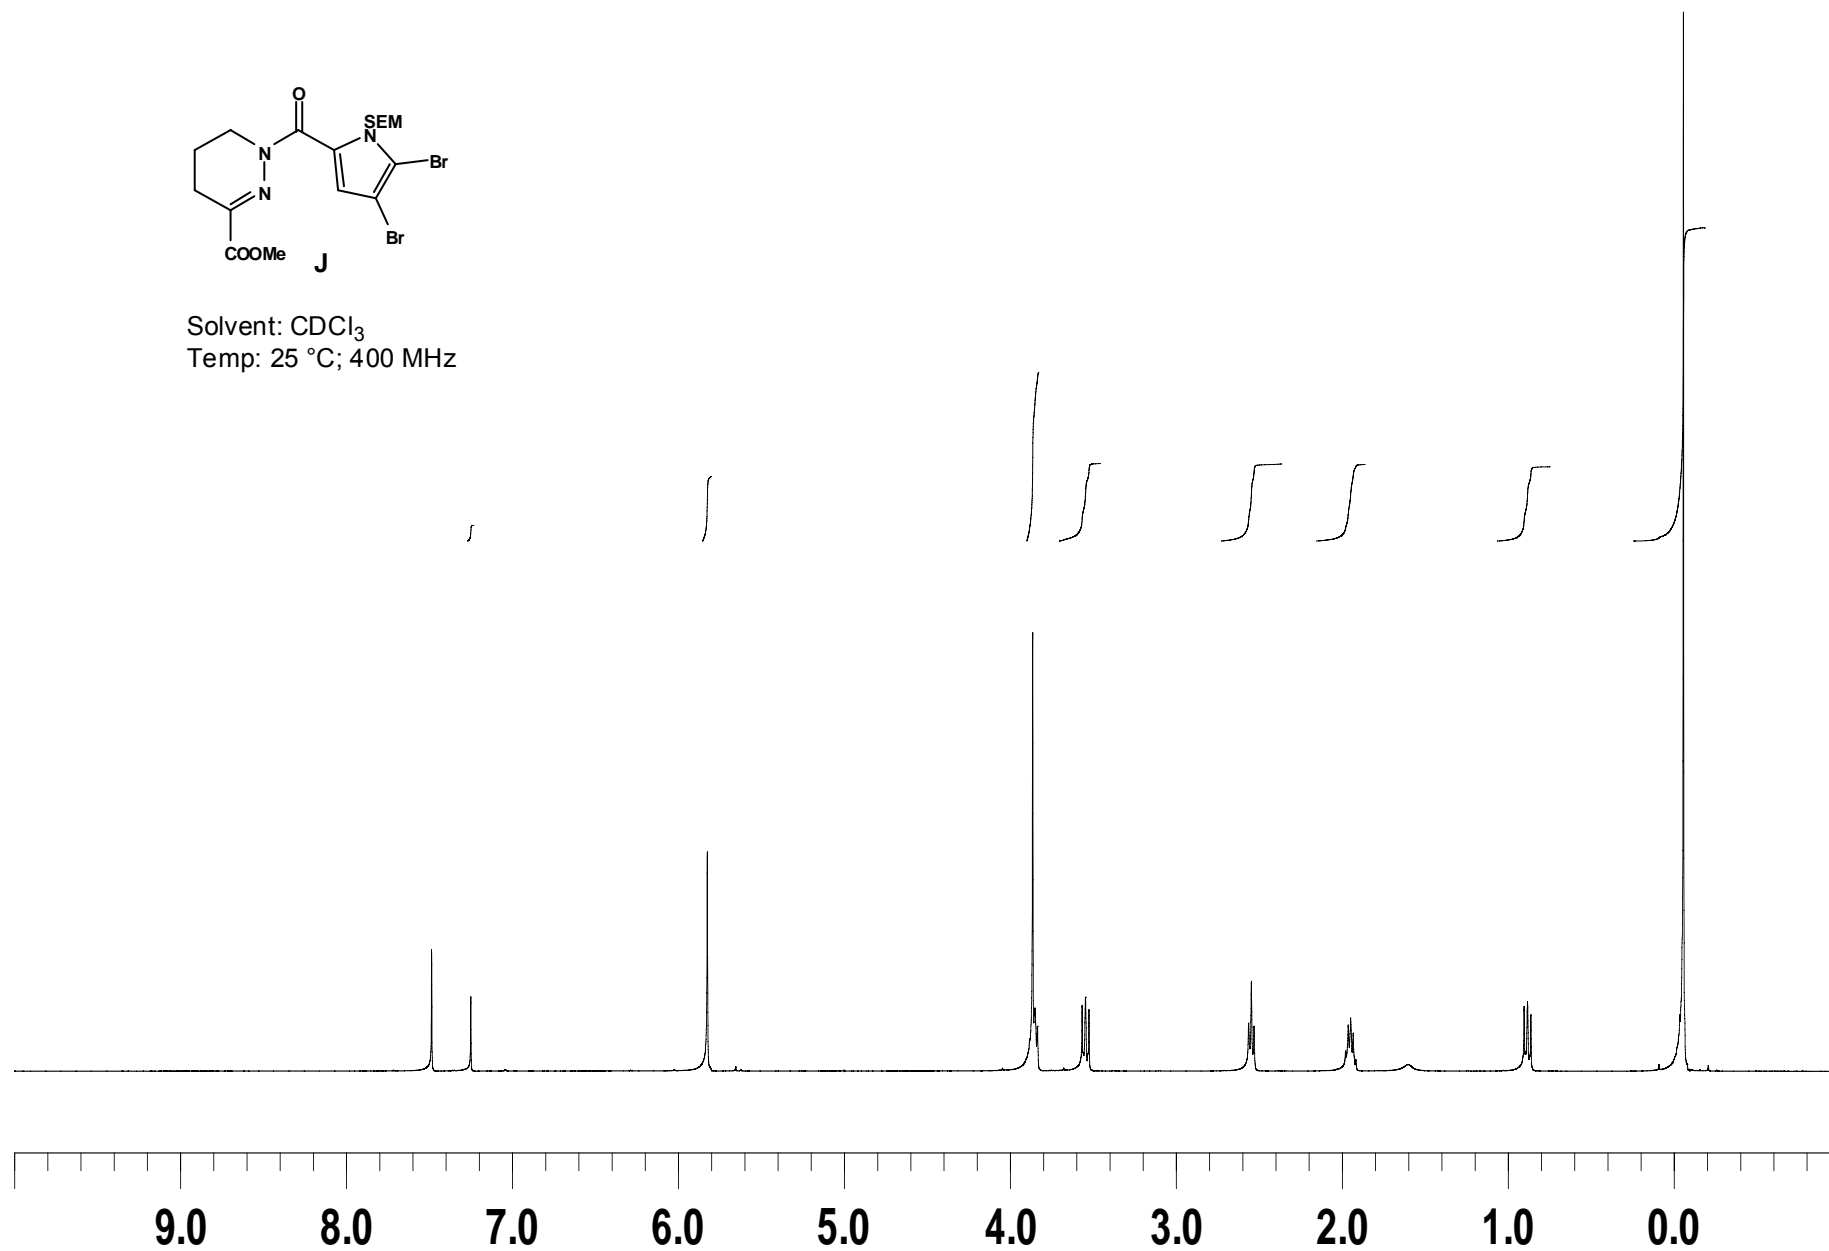



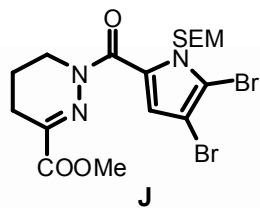

Solvent: CDCl<sub>3</sub>  
75 MHz

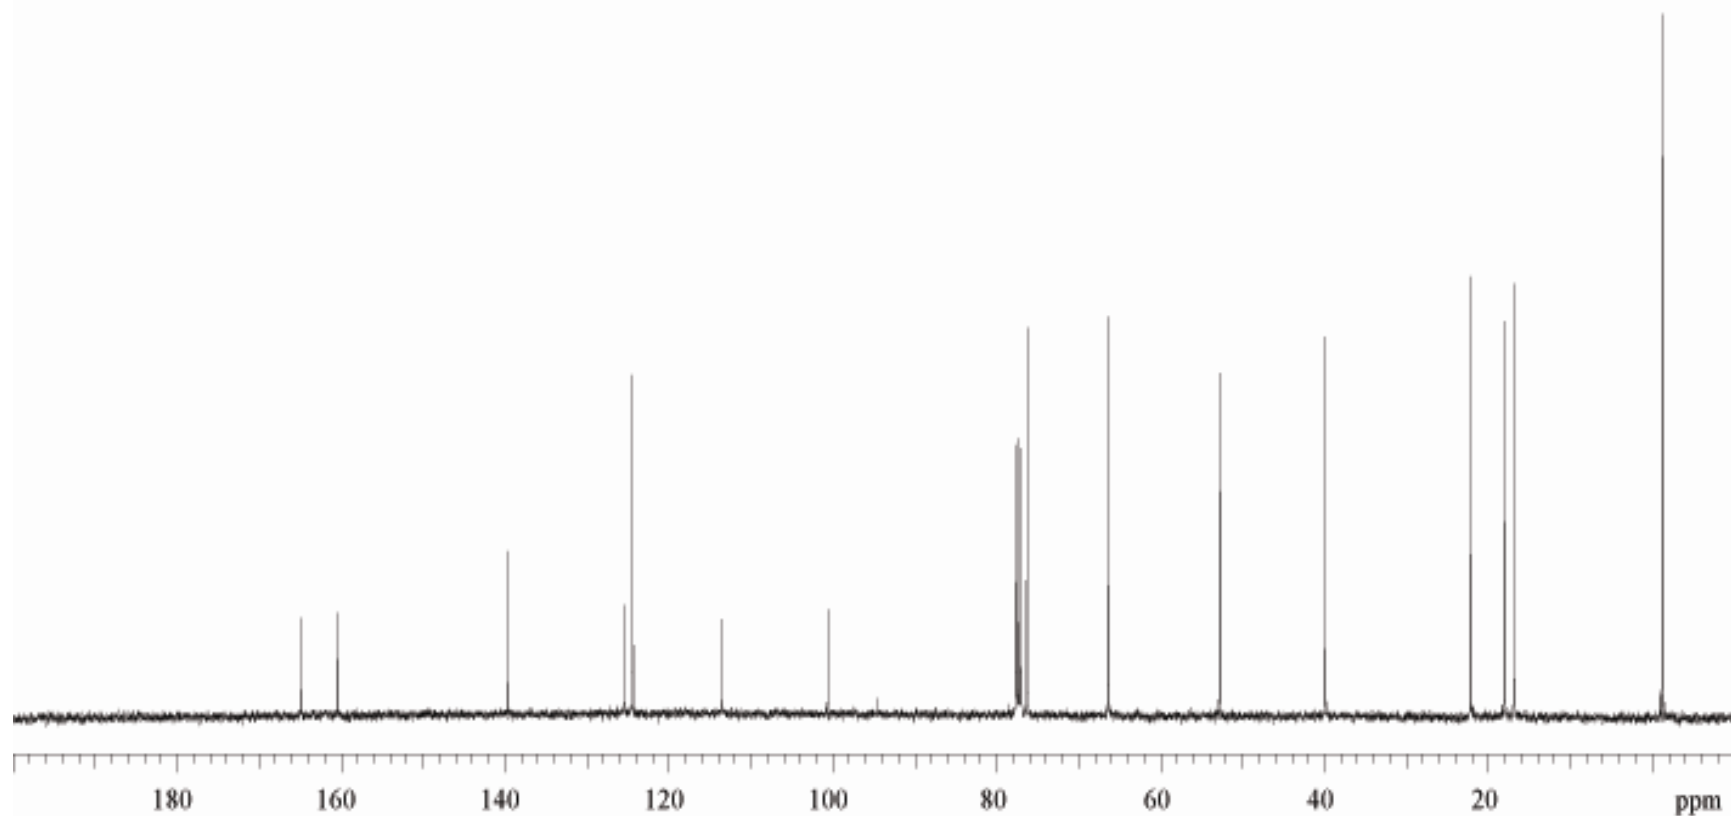

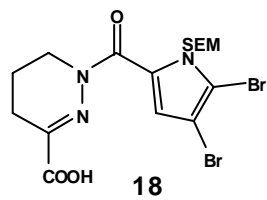

Solvent:  $\text{CDCl}_3$   
Temp: 25 °C; 400 MHz

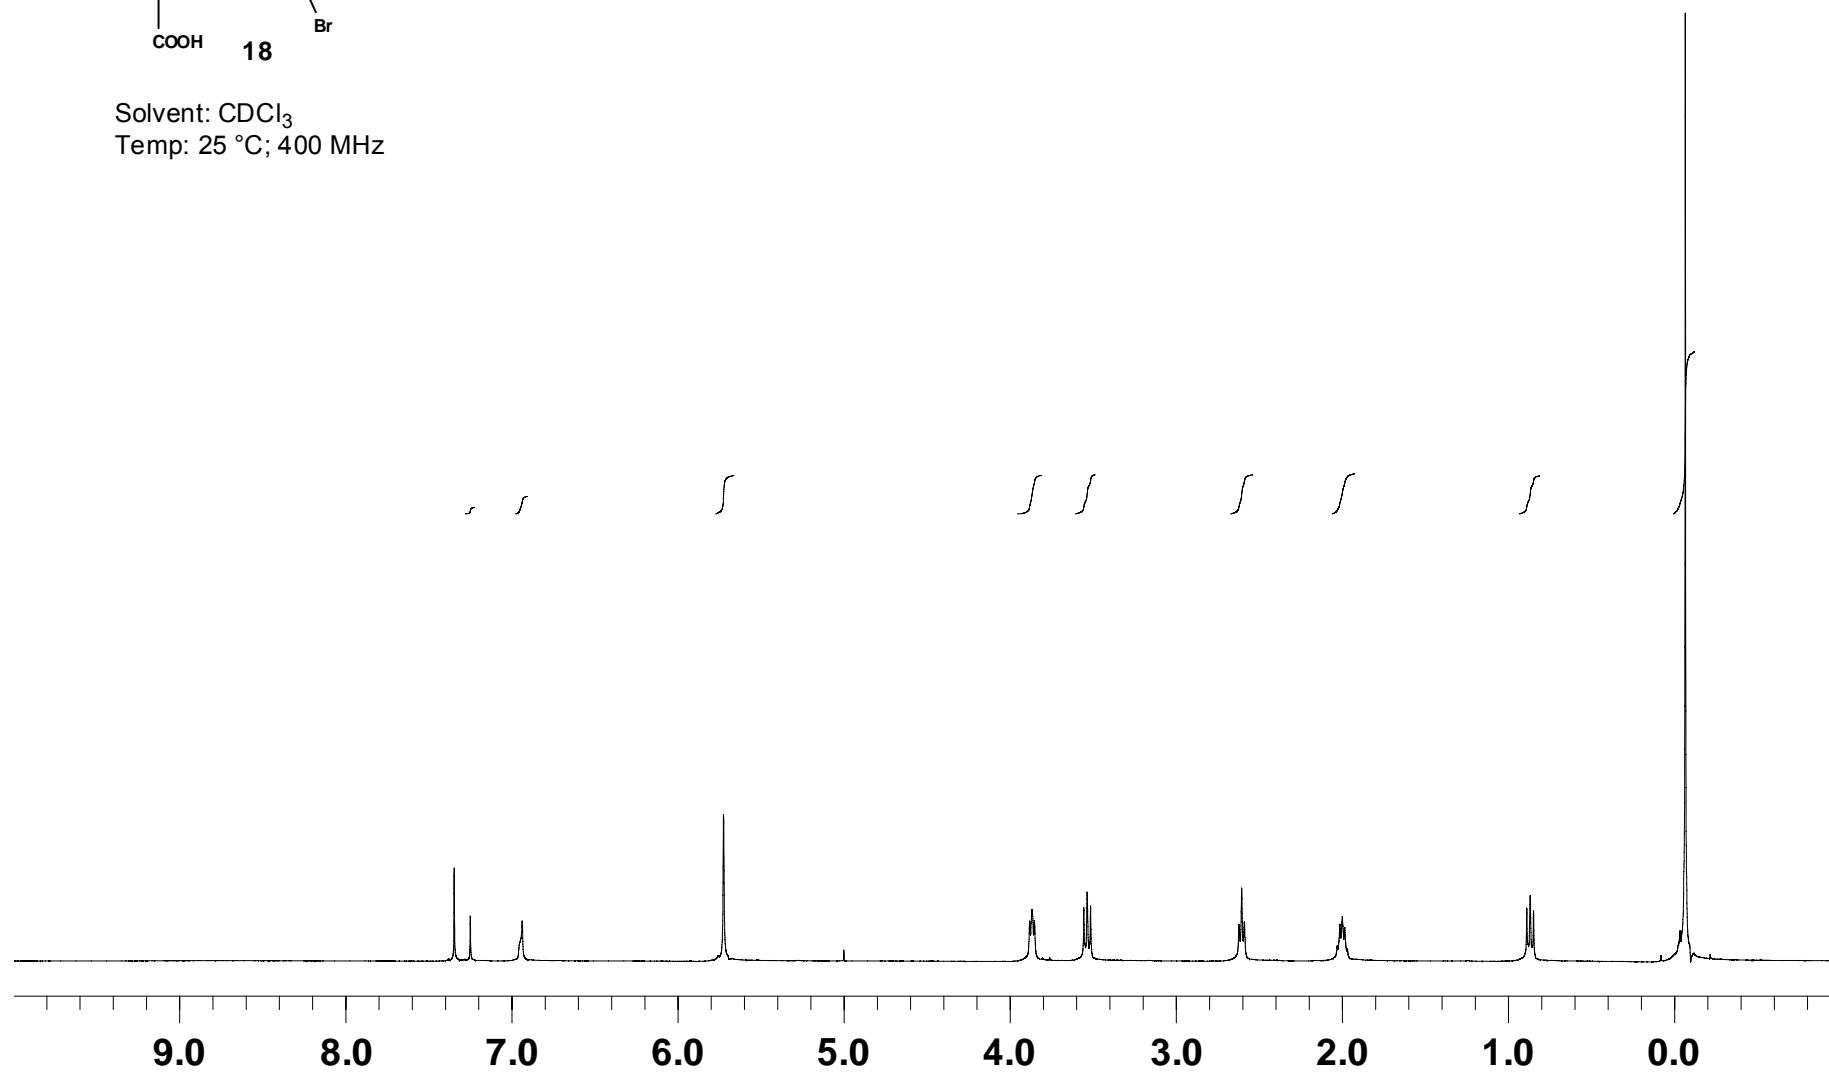

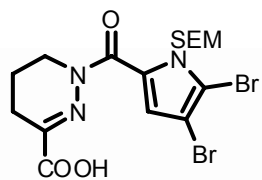

**18**

Solvent: CDCl<sub>3</sub>

75 MHz

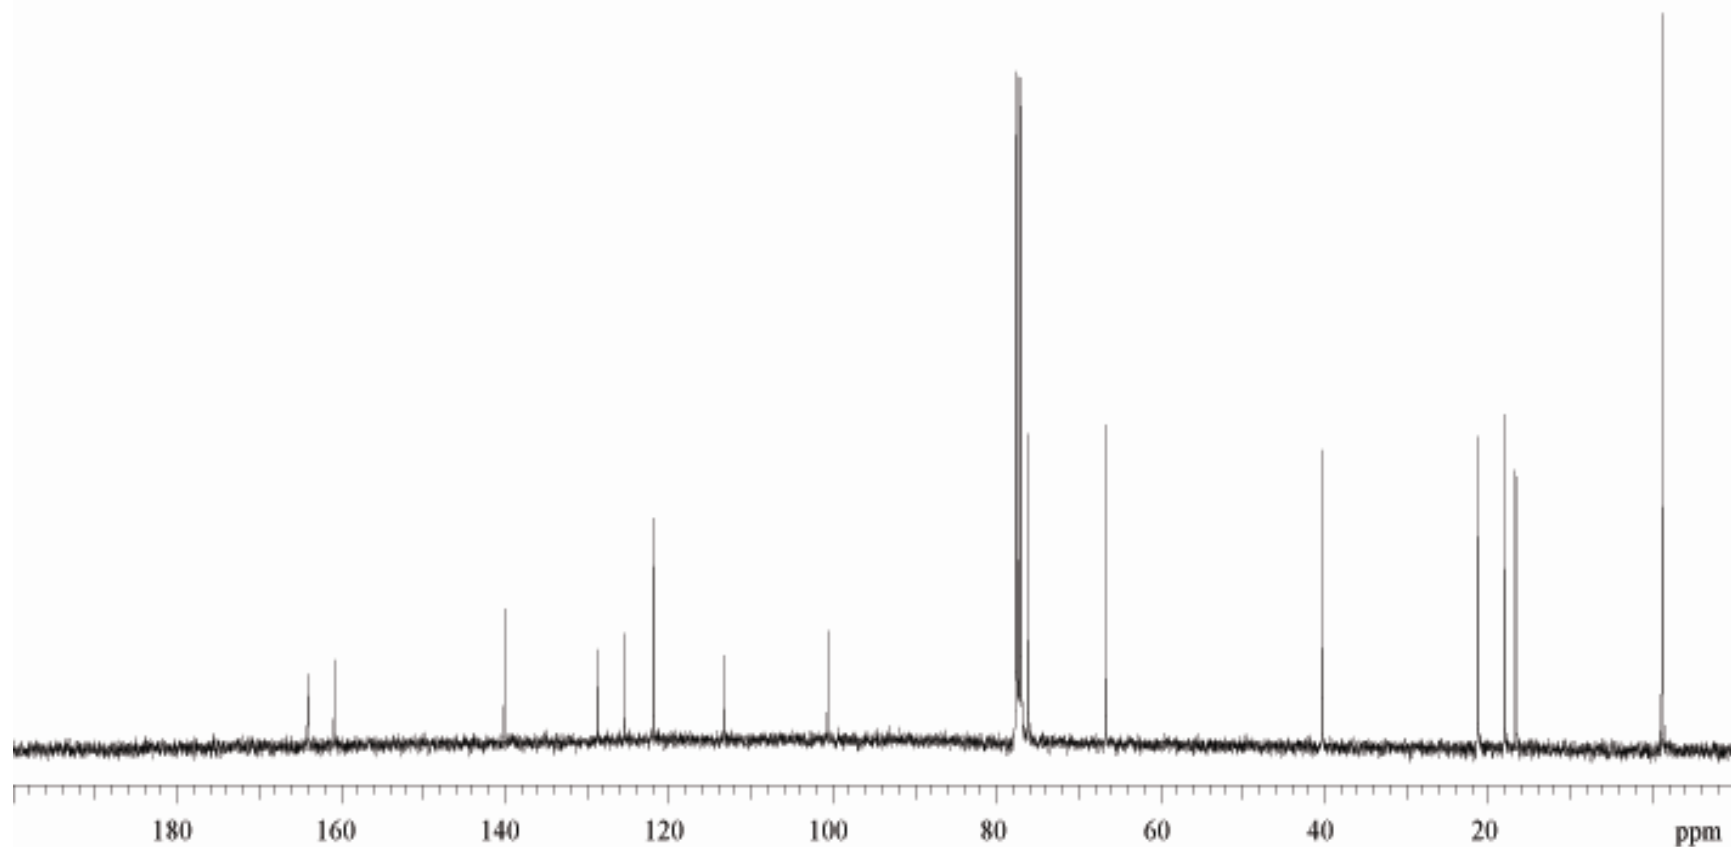

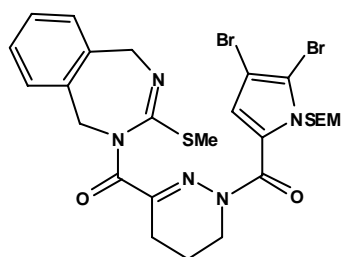

**19**

Solvent:  $\text{CDCl}_3$   
Temp: 25 °C; 400 MHz

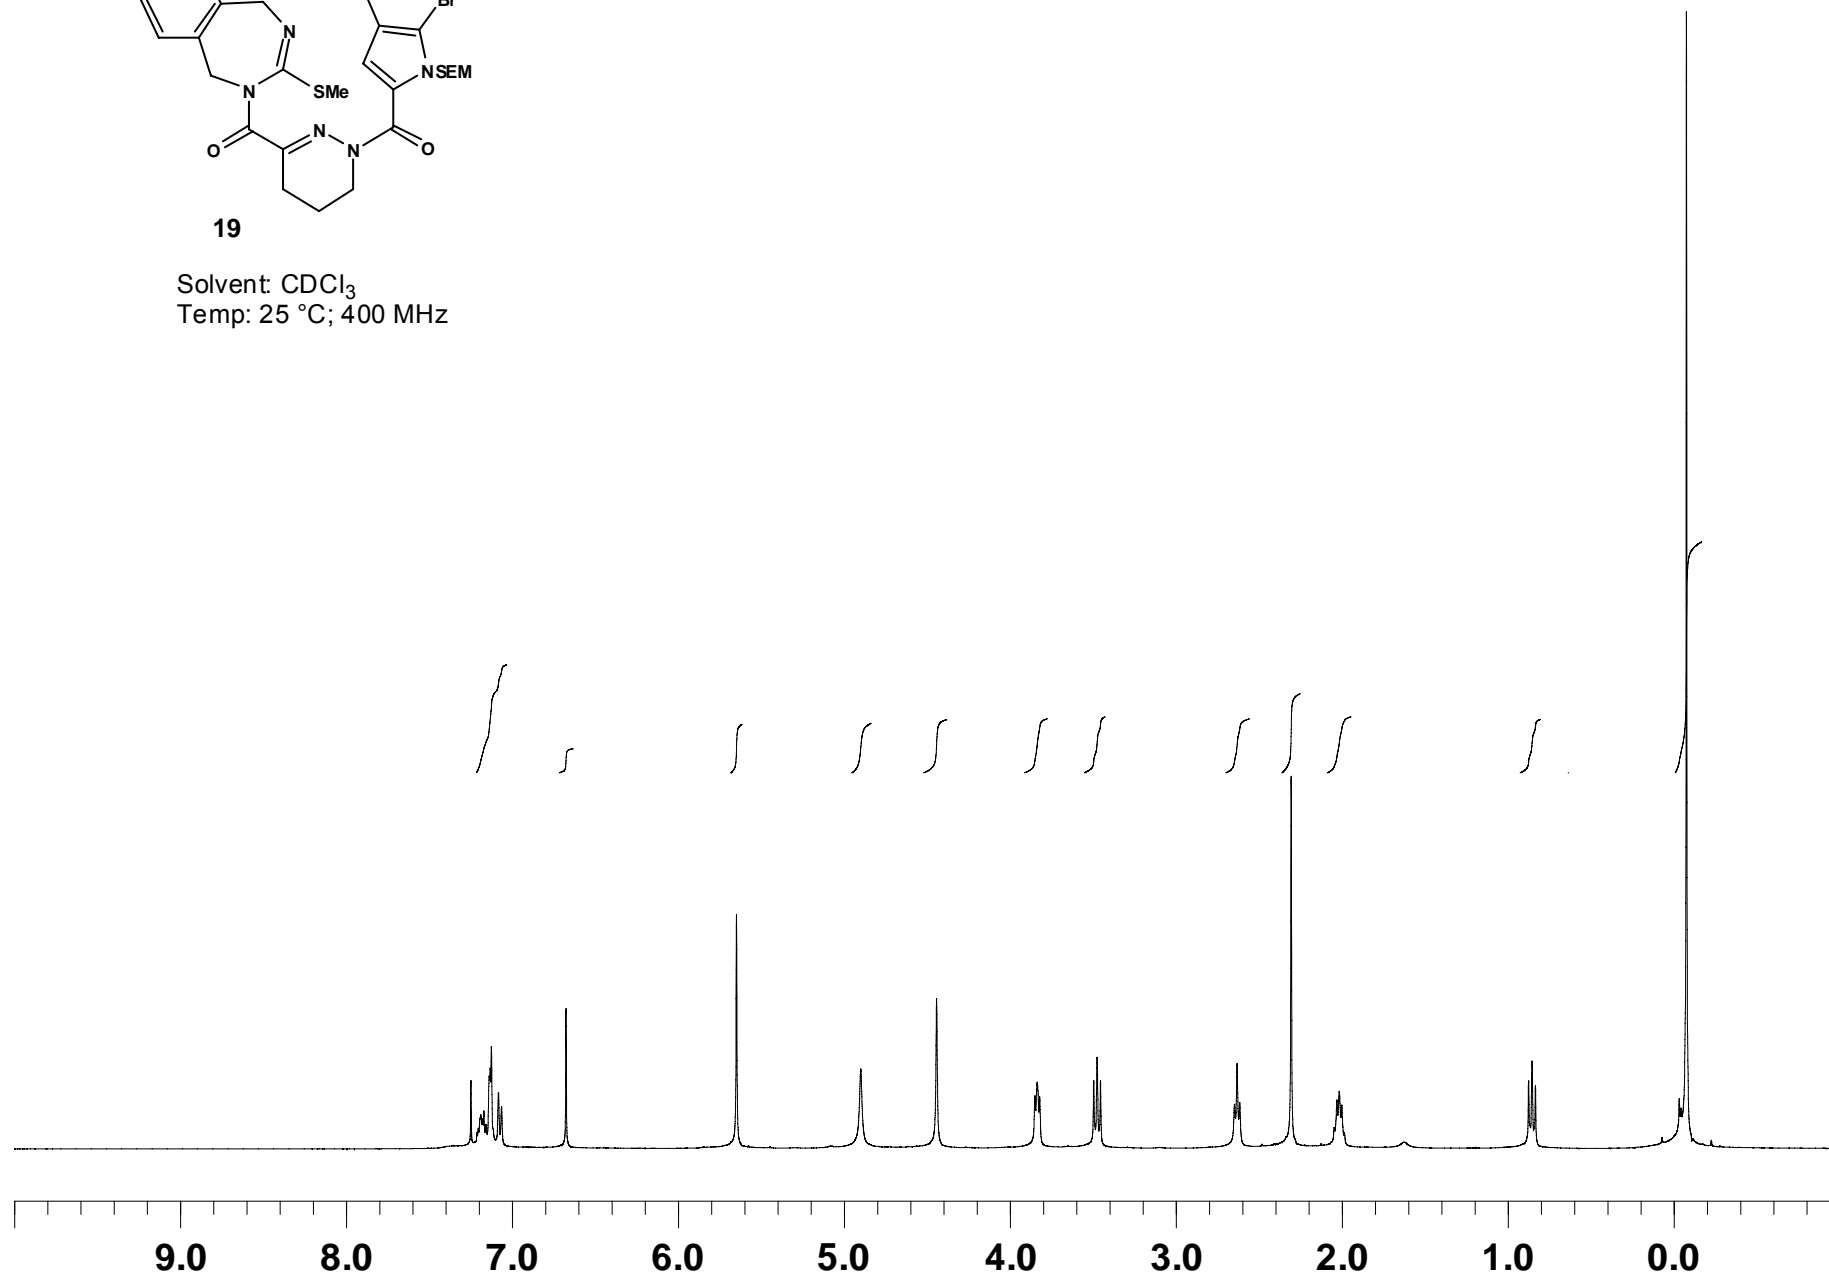

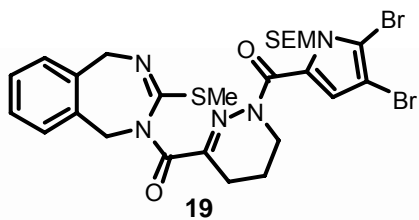

Solvent: CDCl<sub>3</sub>

75 MHz

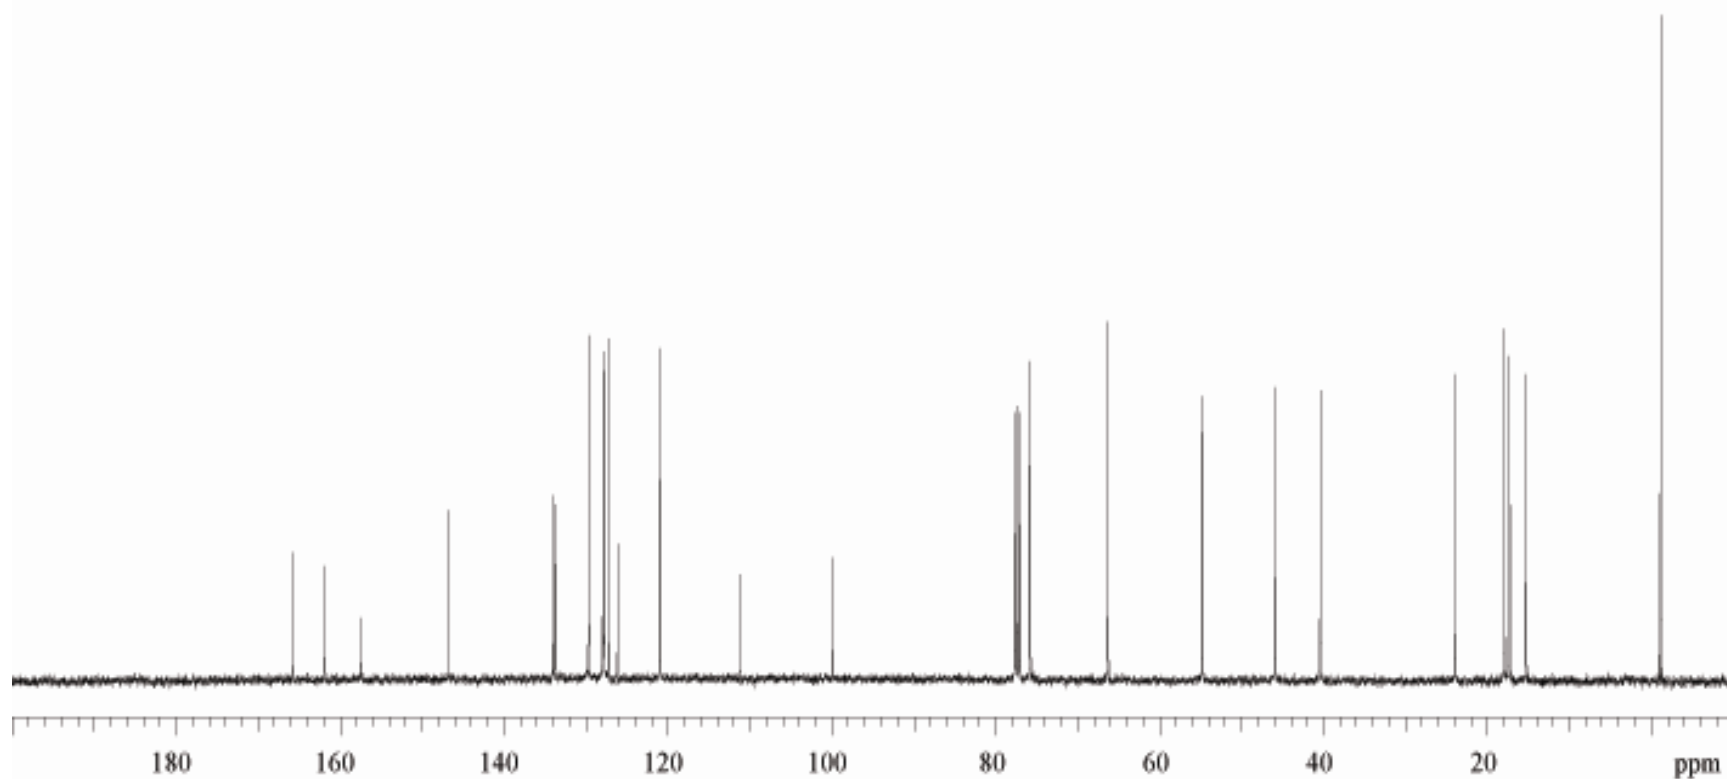

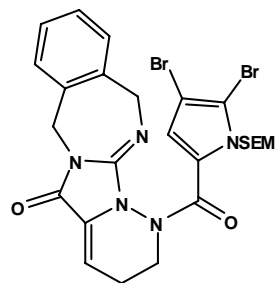

**20**

Solvent: CD<sub>3</sub>CN  
Temp: 70 °C; 400 MHz

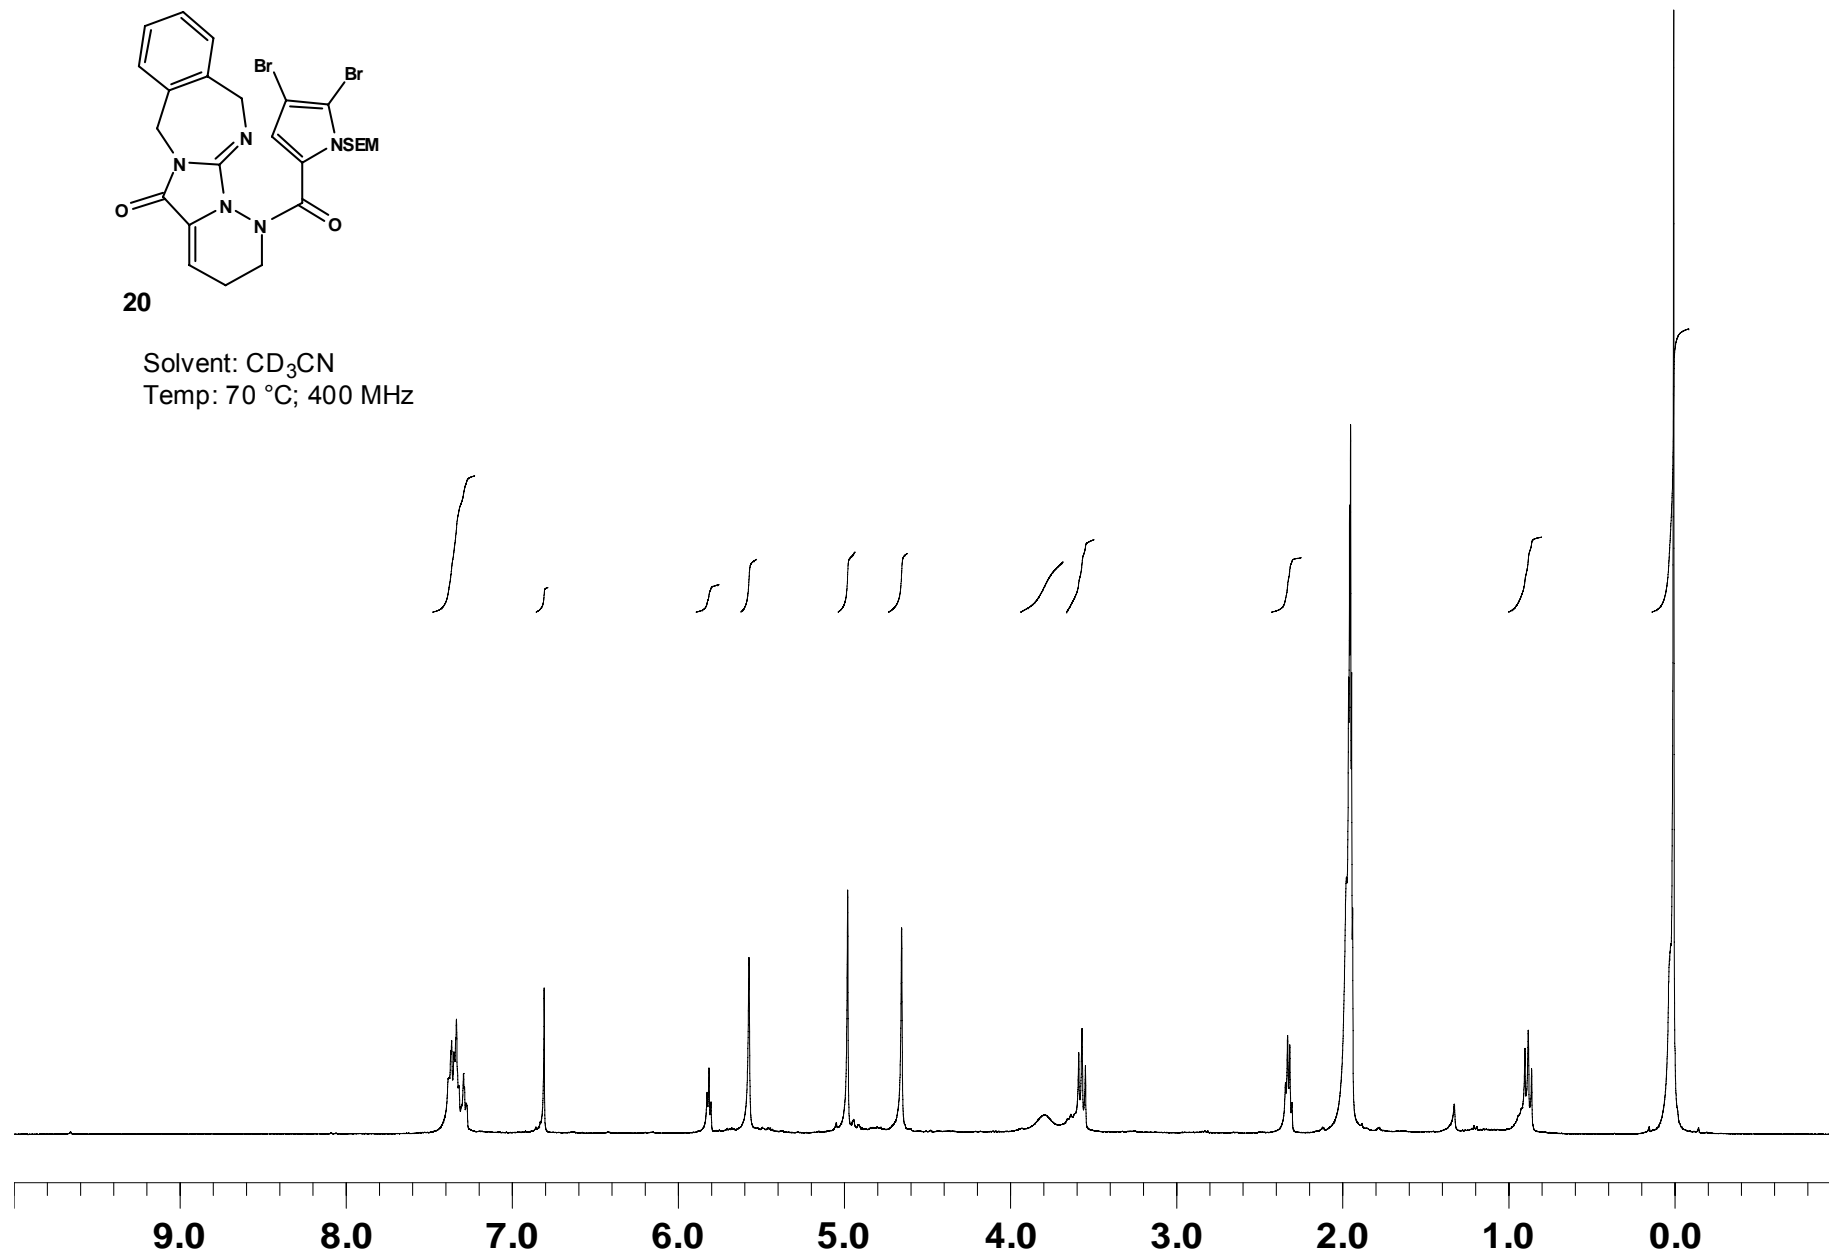

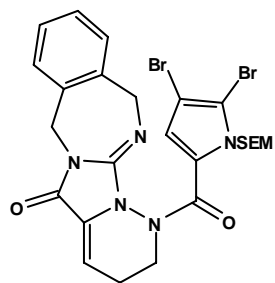

**20**

Solvent: CD<sub>3</sub>CN  
Temp: 70 °C; 100 MHz

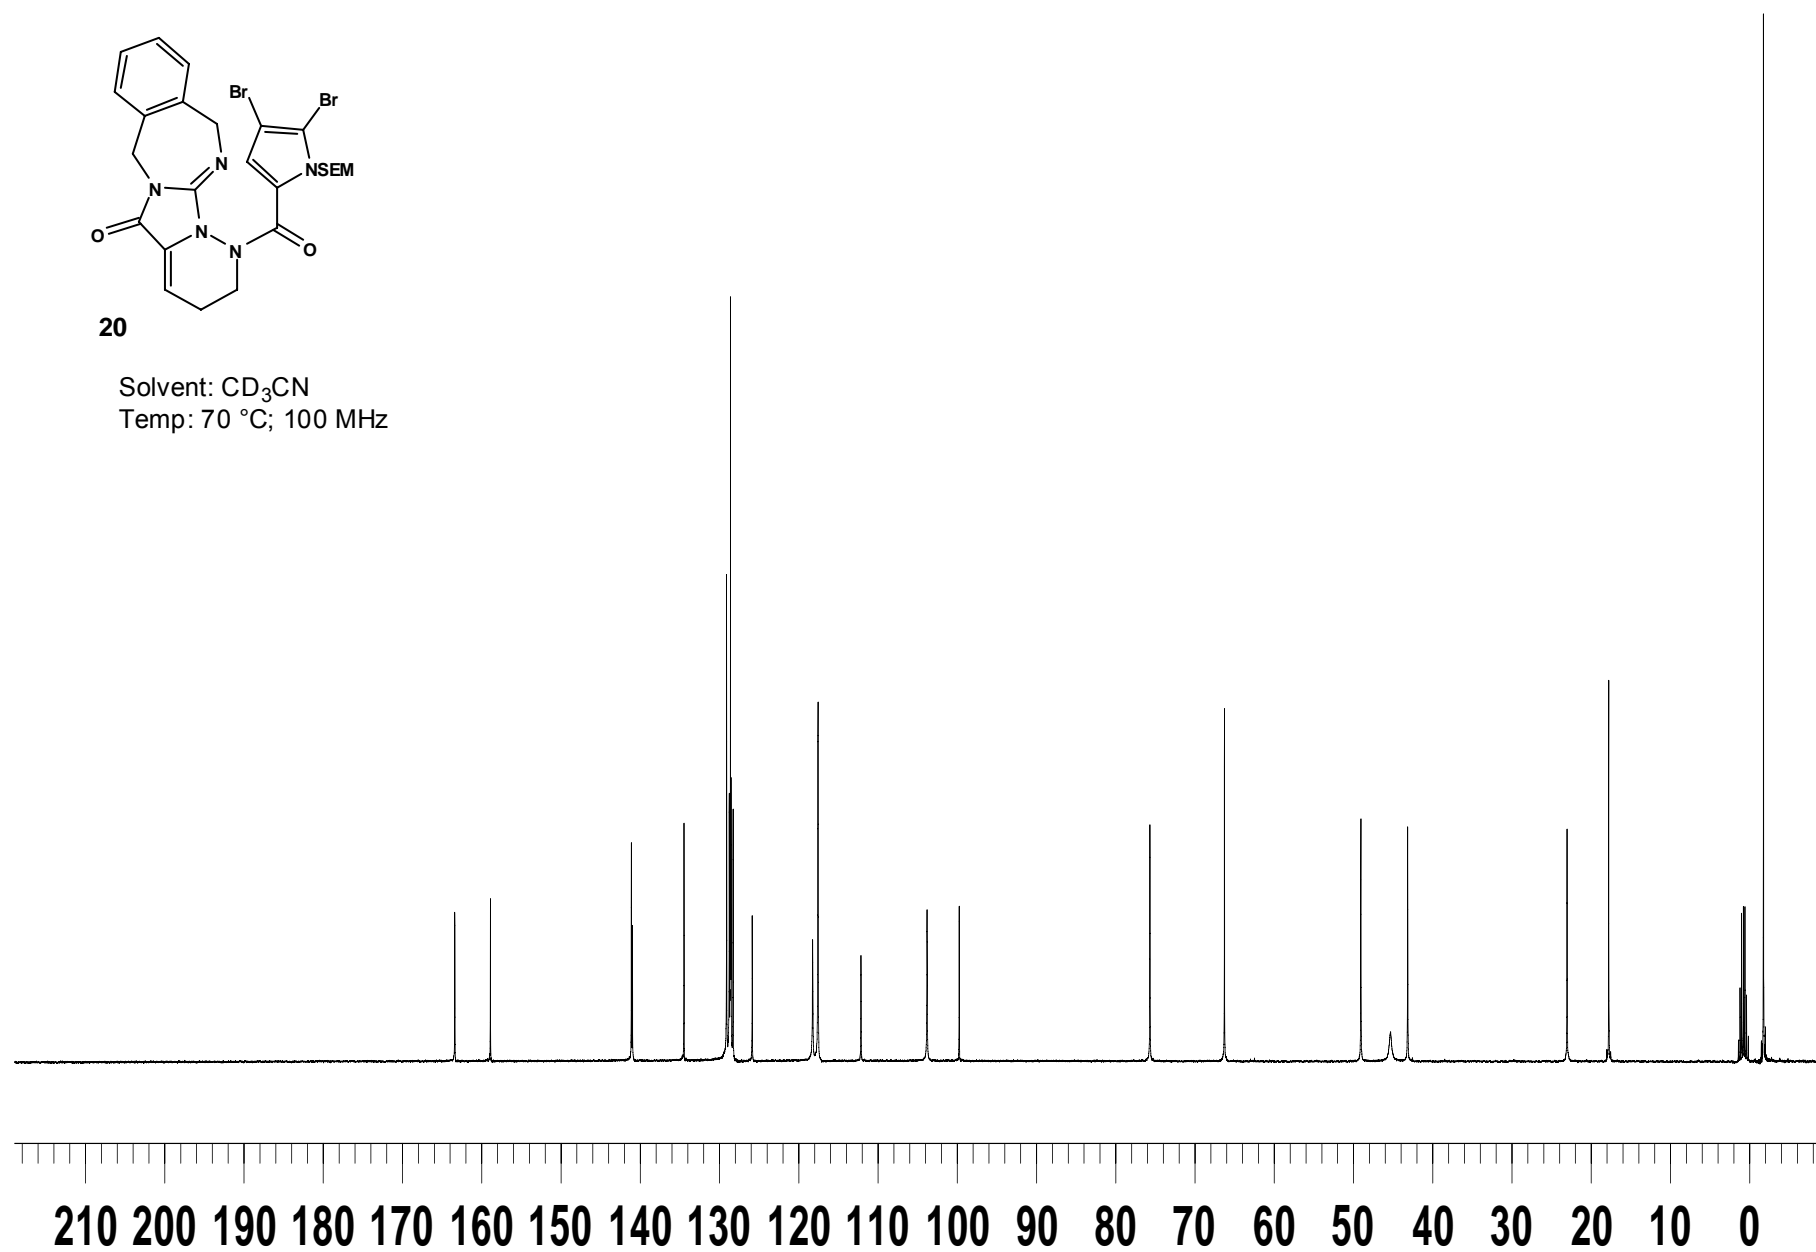

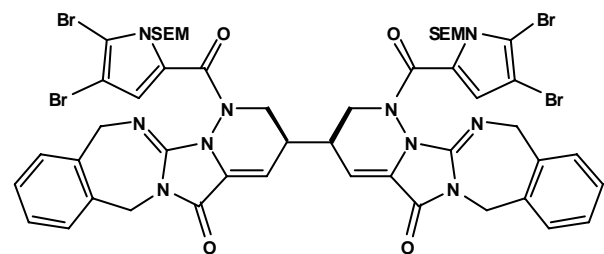

**21** (*meso*)

Solvent: CD<sub>3</sub>CN

Temp: 70 °C; 400 MHz

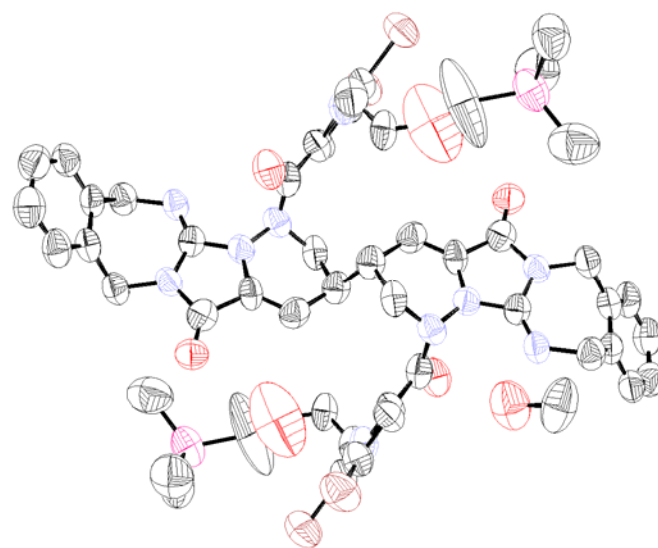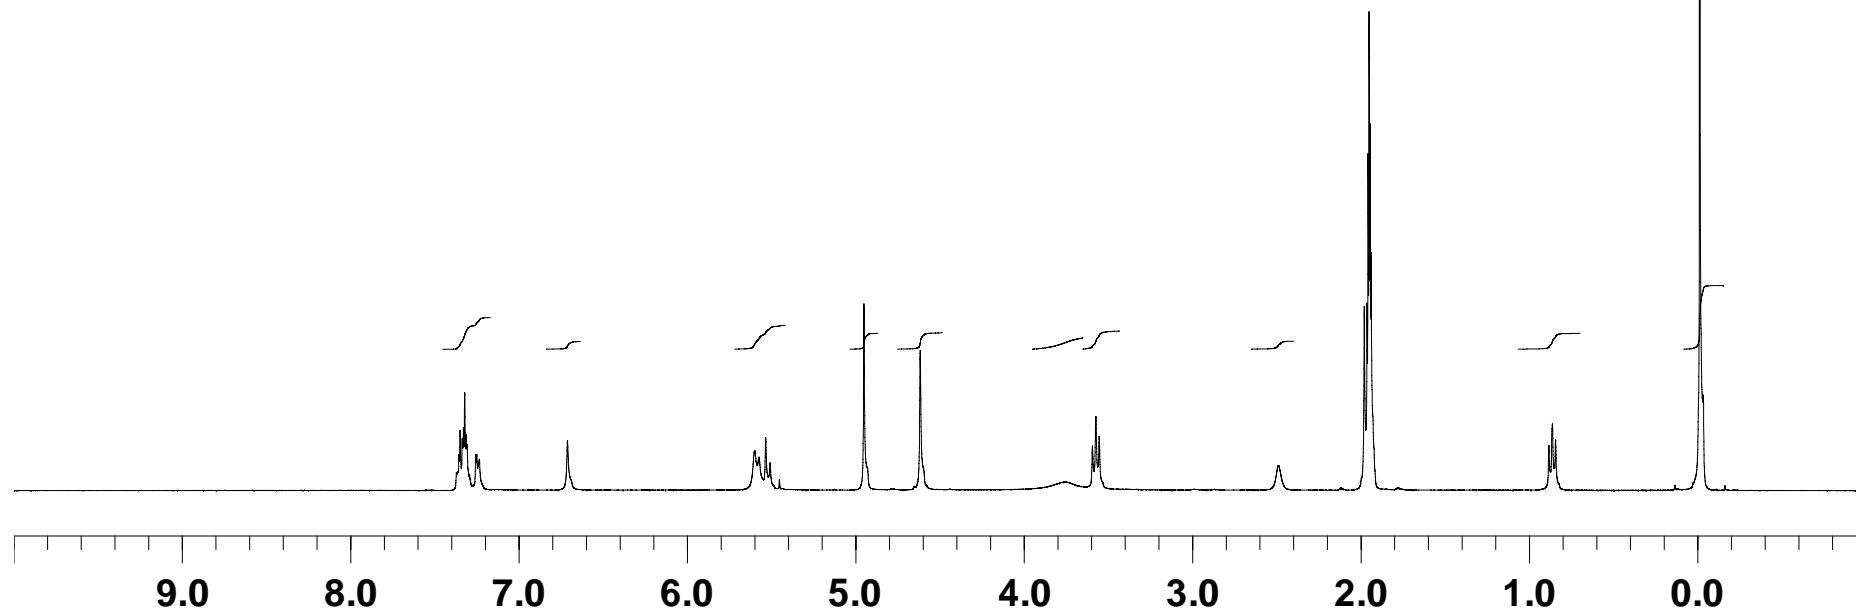



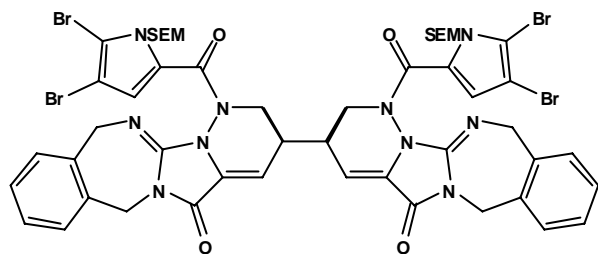

**21** (*meso*)

Solvent: CD<sub>3</sub>CN

Temp: 70 °C; 100 MHz

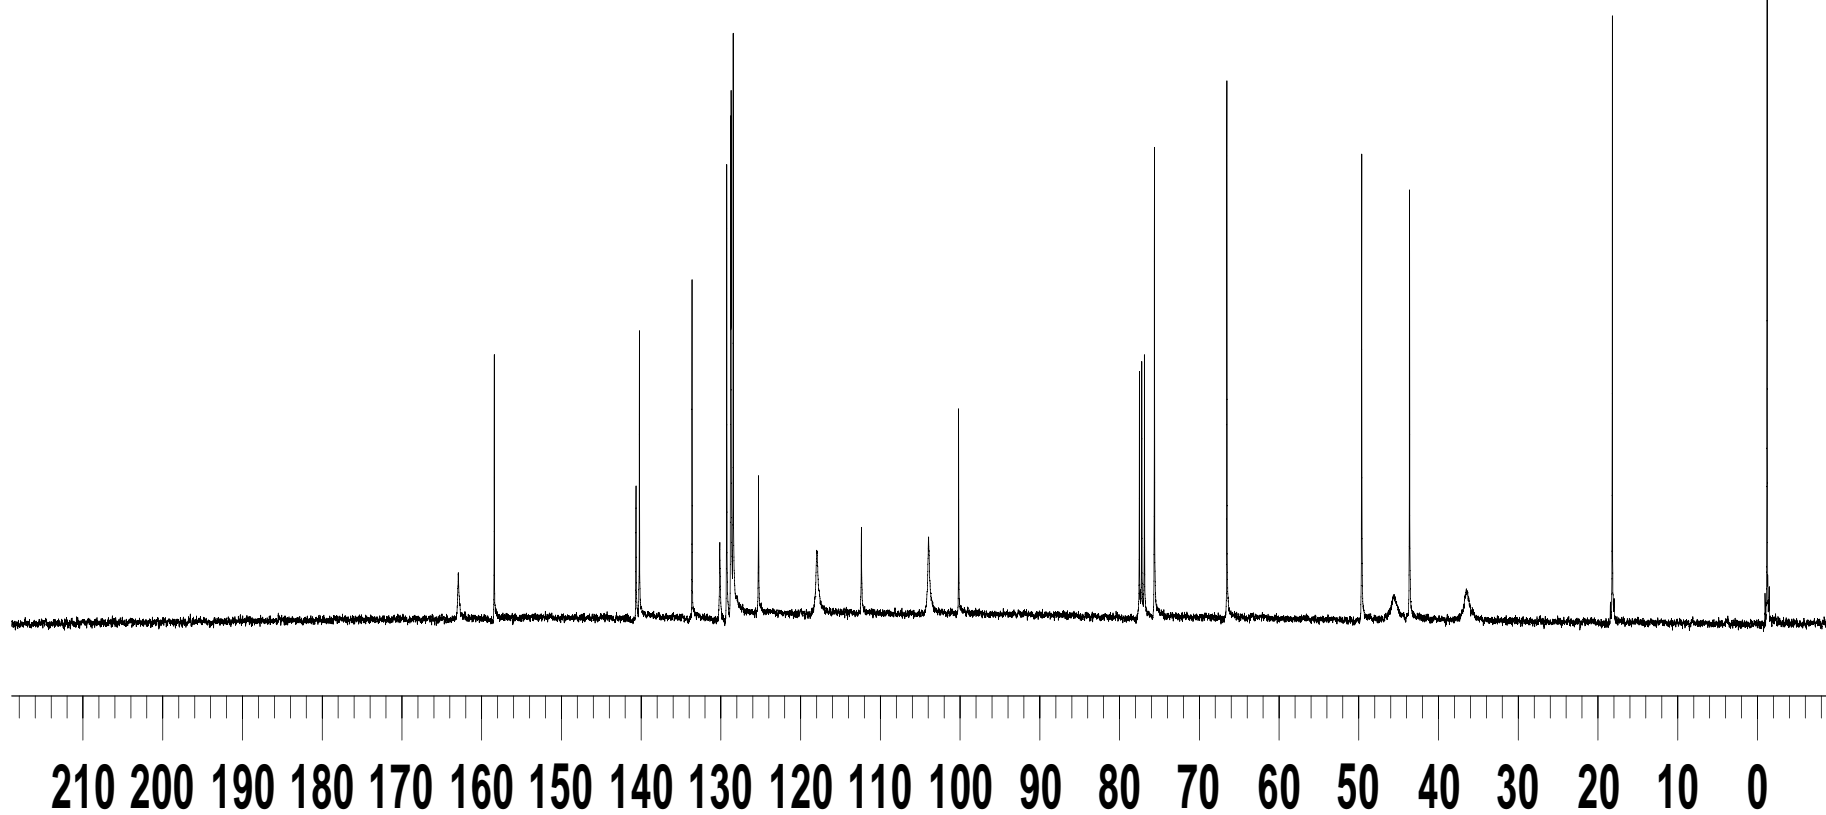

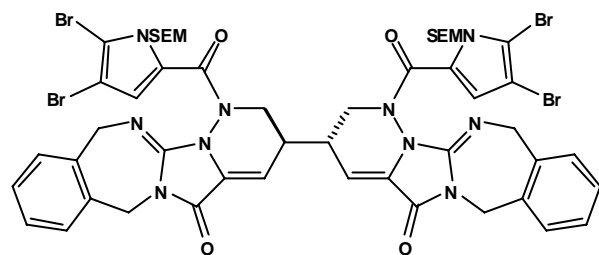

**21** ( $C_2$ )

Solvent:  $CD_3CN$

Temp: 70 °C; 400 MHz

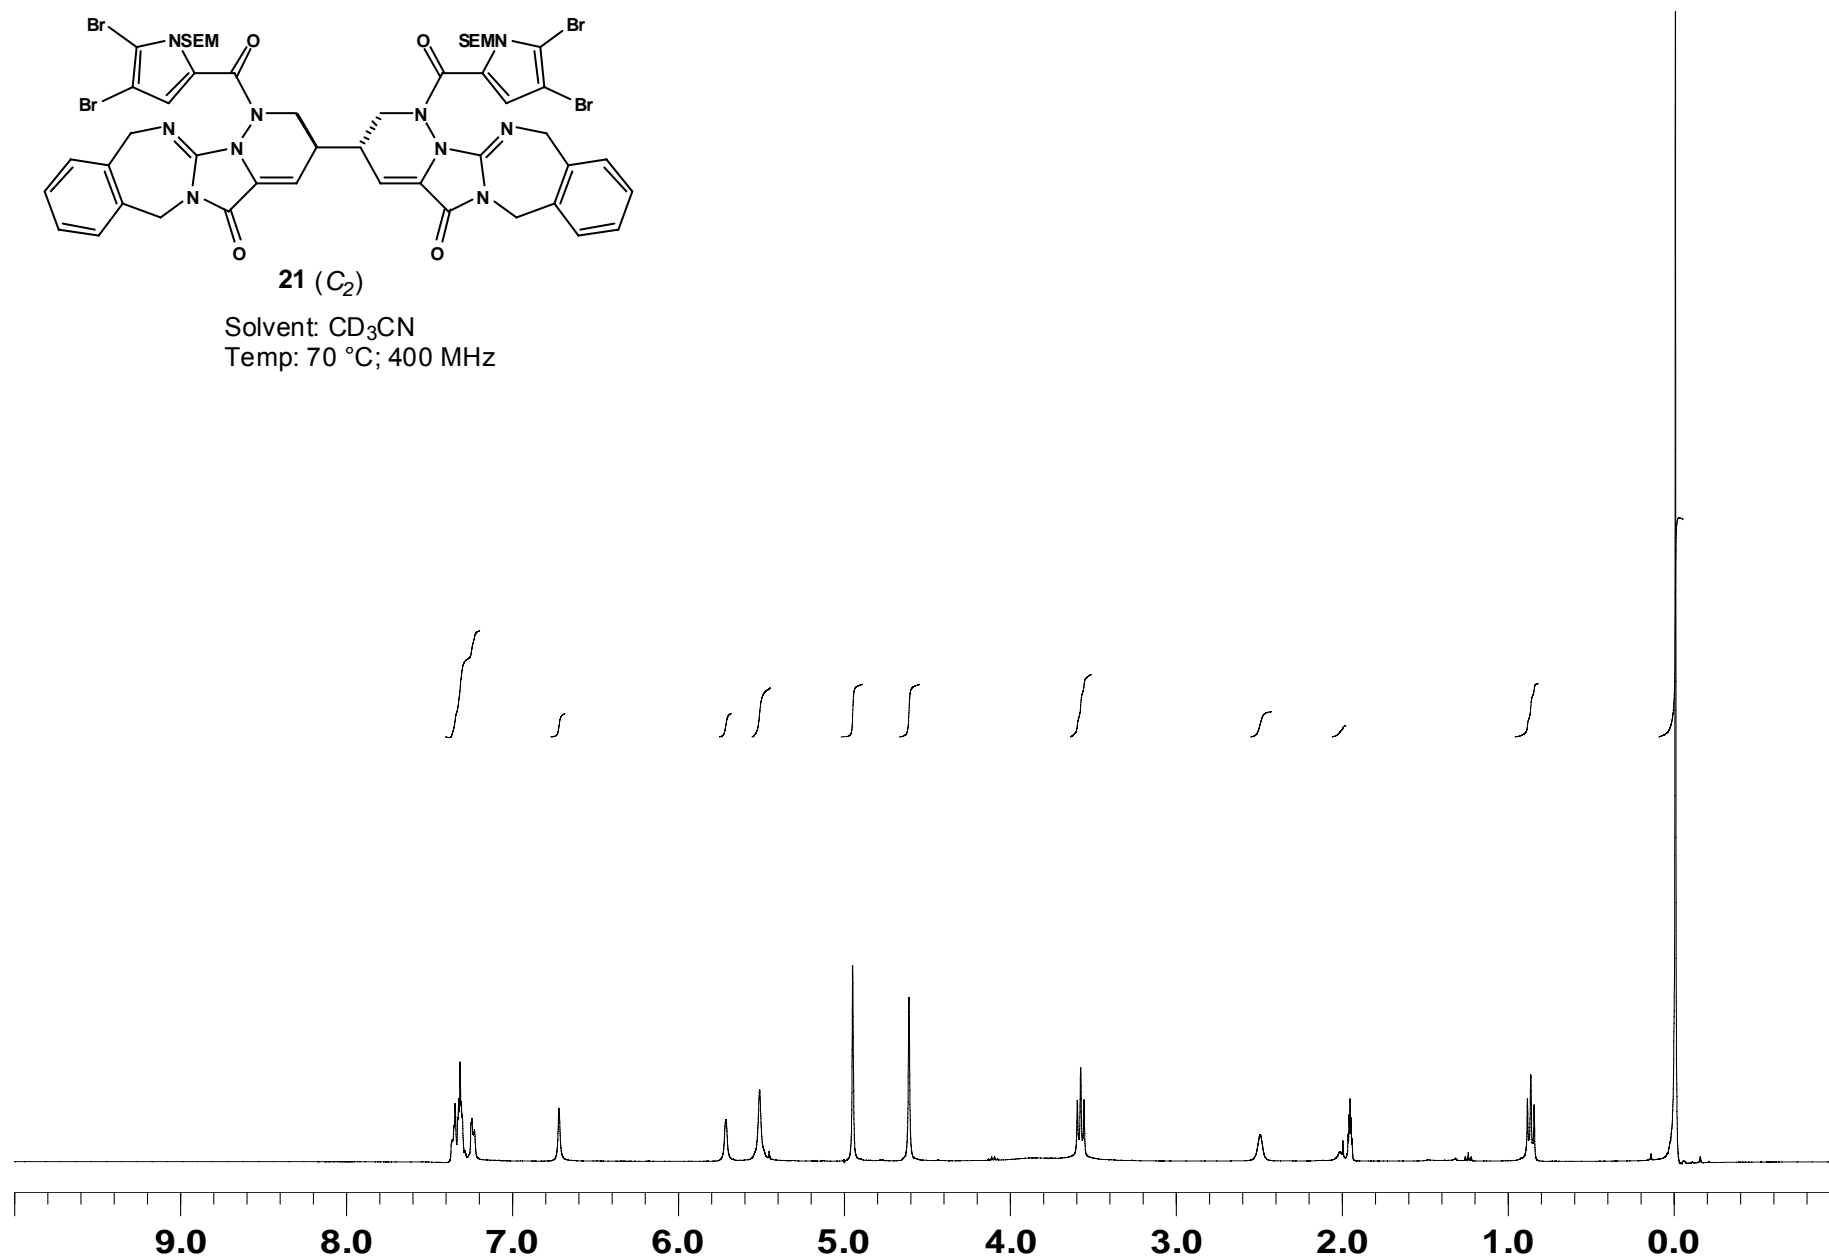

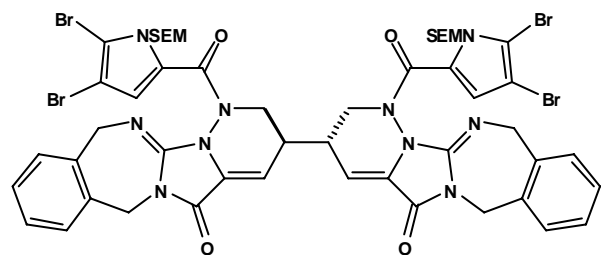

**21** ( $C_2$ )

Solvent:  $CD_3CN$

Temp: 70 °C; 100 MHz

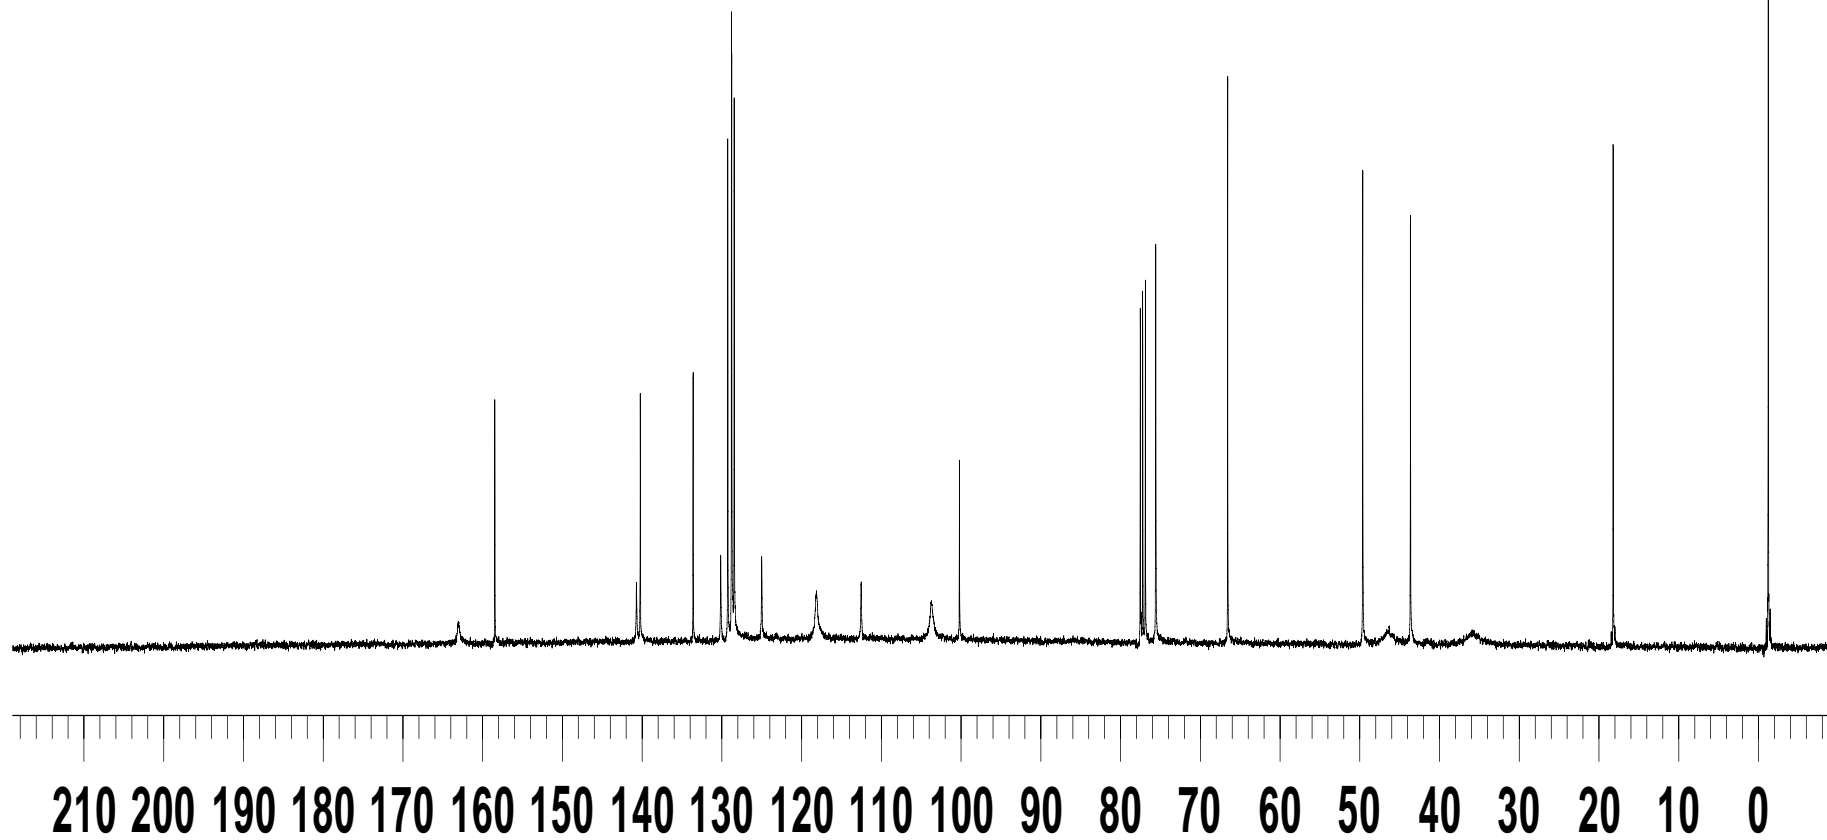

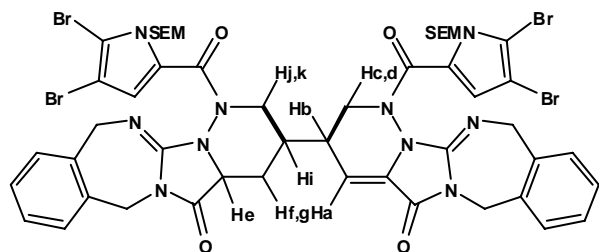

**27**

one isomer  
unknown stereochemistry

Solvent: CD<sub>3</sub>CN

Temp: 70 °C; 400 MHz

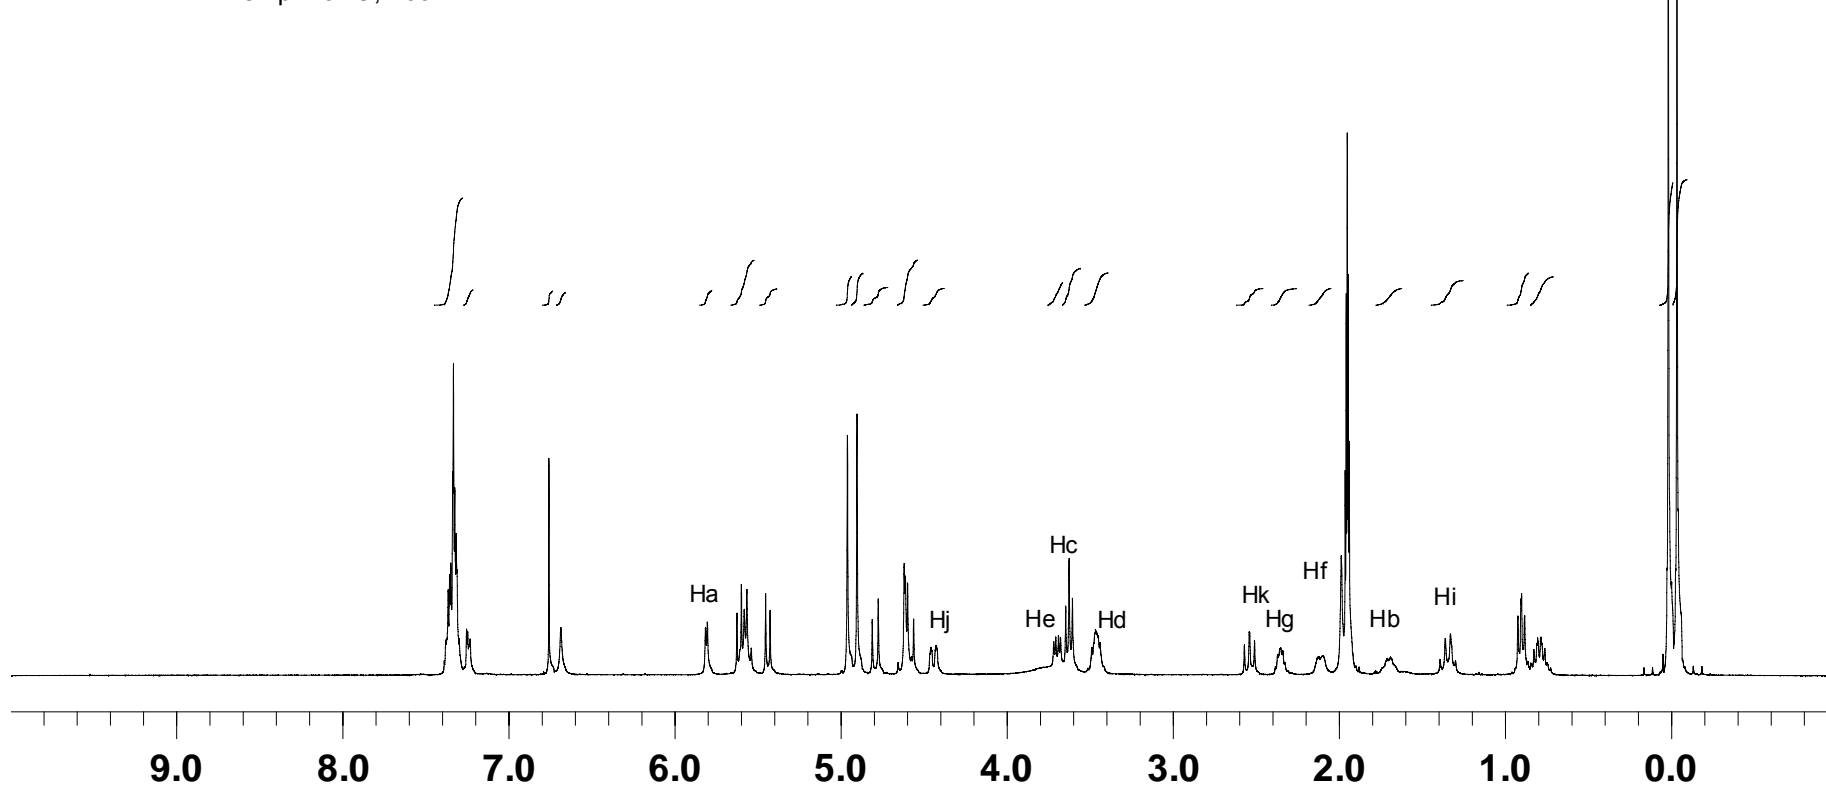

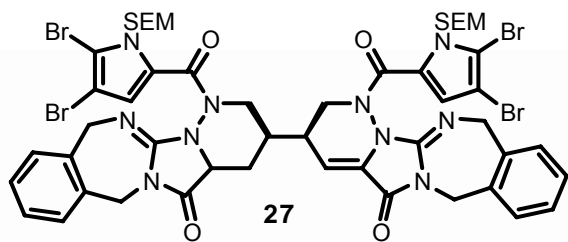

Solvent: CDCl<sub>3</sub>

75 MHz

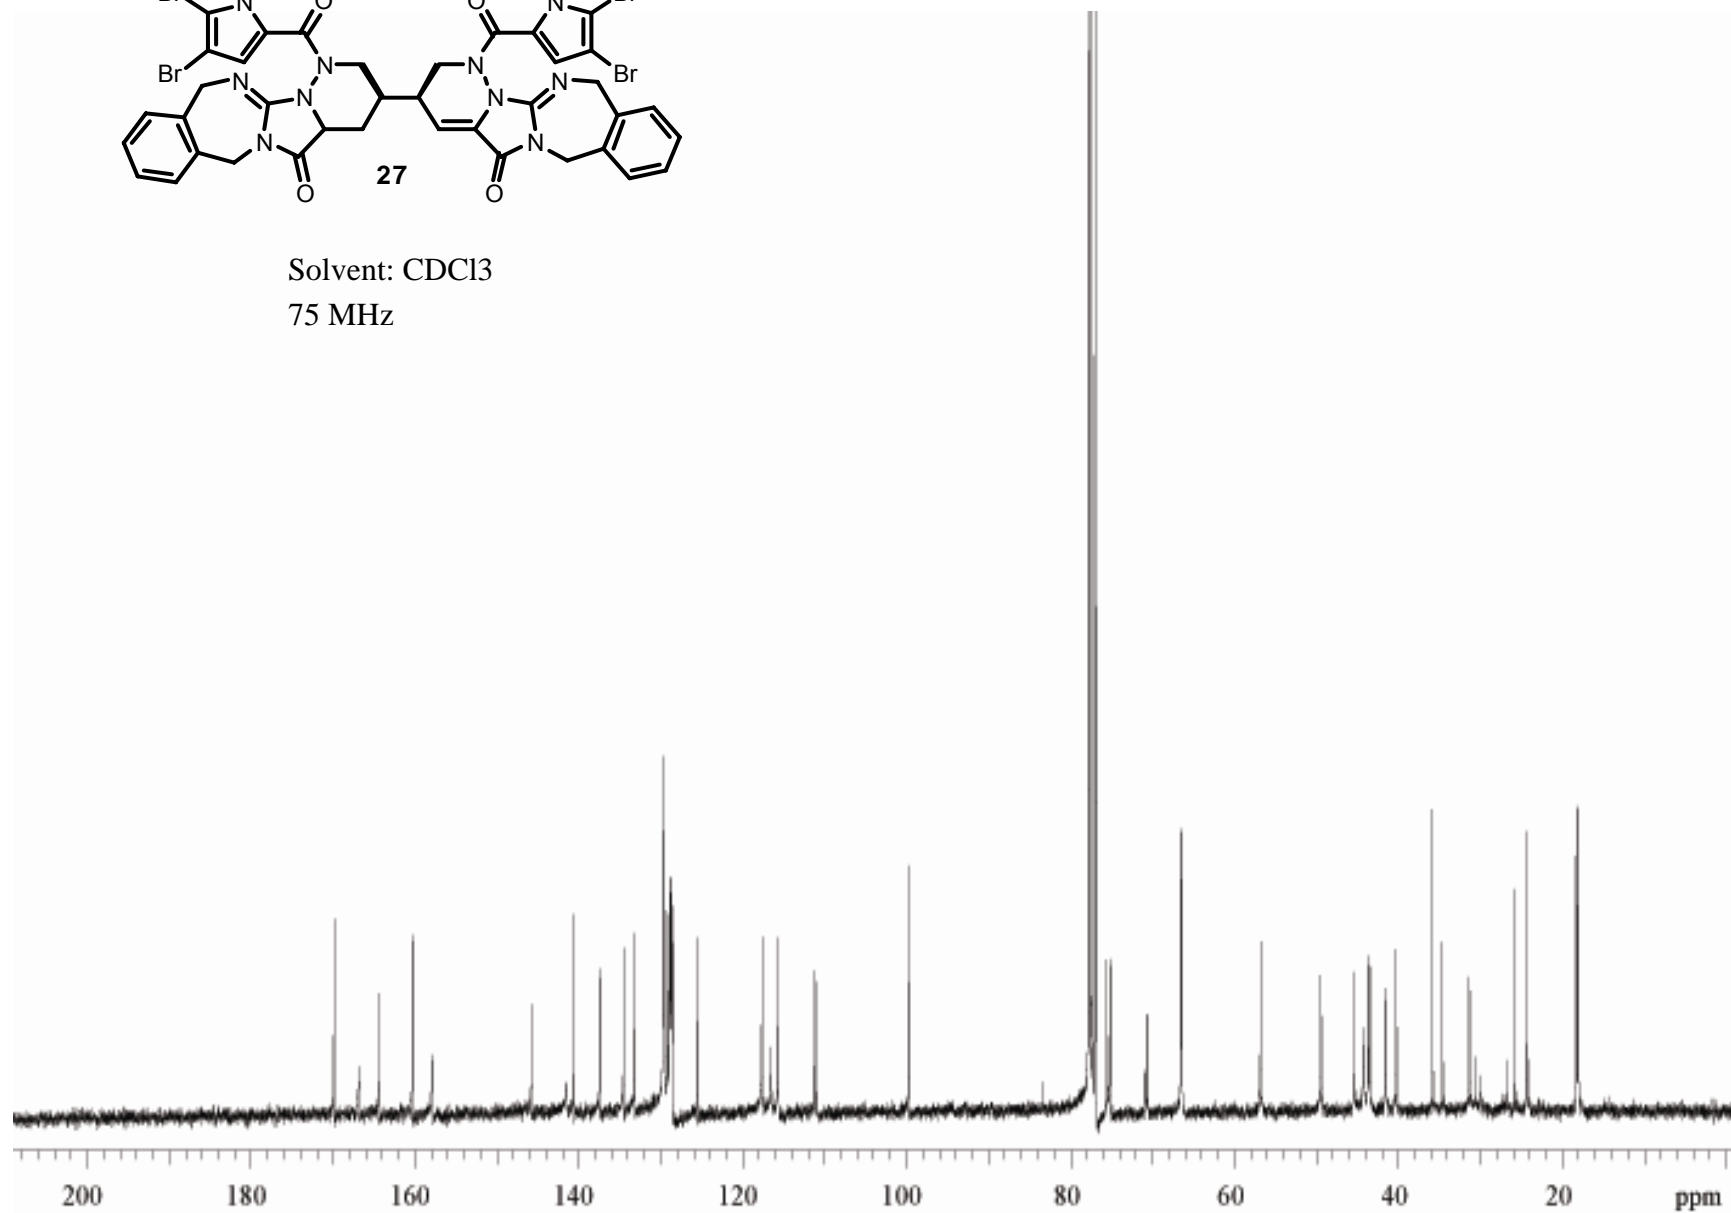

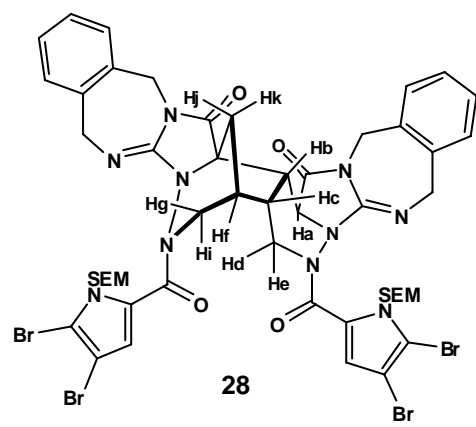

Solvent: CD<sub>3</sub>CN  
Temp: 25 °C; 400 MHz

Partial spectrum of the same sample being treated with D<sub>2</sub>O overnight.

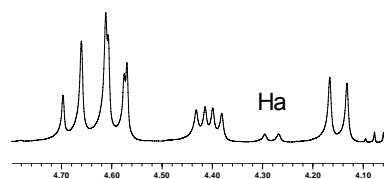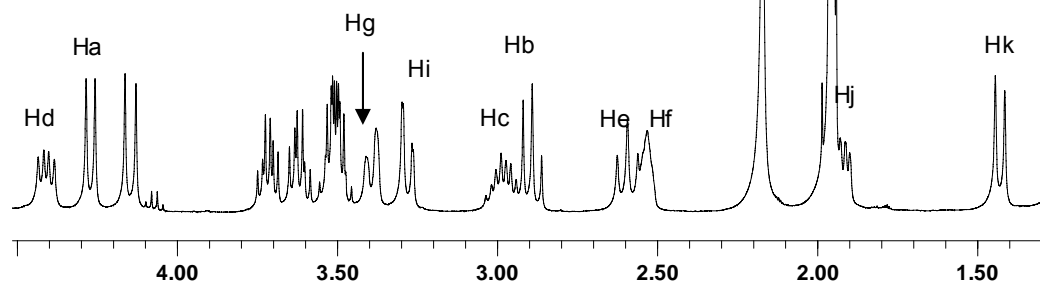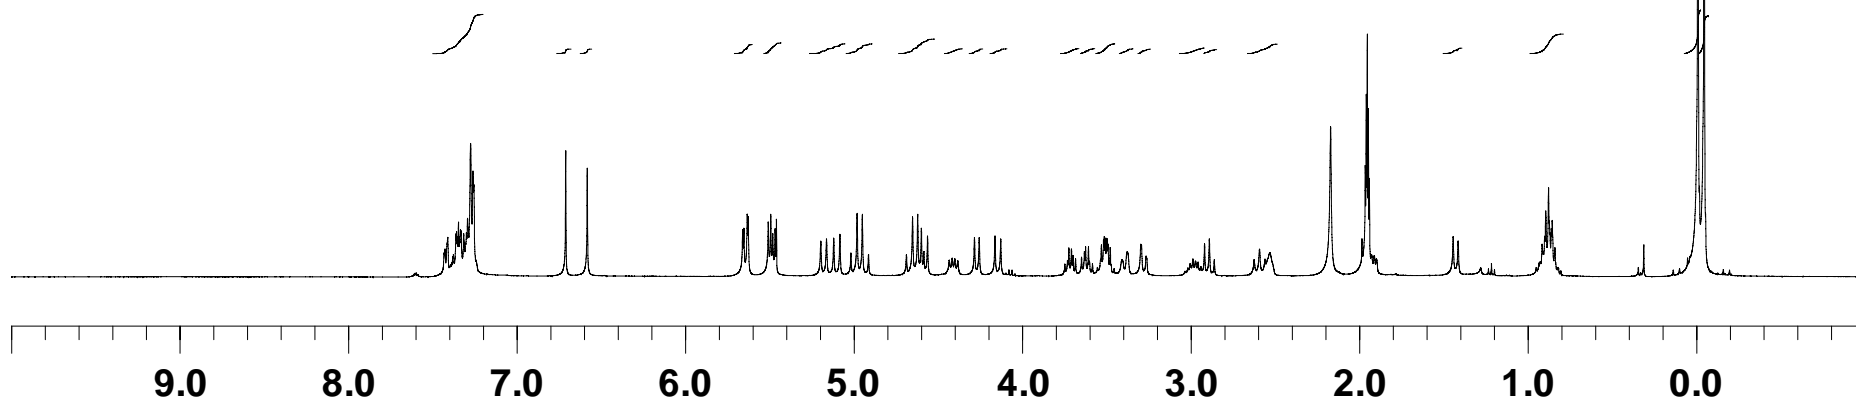

STANDARD 1H OBSERVE

Pulse Sequence: relayh  
Solvent: CD3CN  
Ambient temperature  
File: QL-IV-157-PTLC1-COSY  
INOVA-400 "pele400"

Relax. delay 1.000 sec  
COSY 90-45  
Acq. time 0.150 sec  
Width 3414.1 Hz  
2D Width 3414.1 Hz  
2 repetitions  
512 increments  
OBSERVE H1, 399.7814203 MHz  
DATA PROCESSING  
Sine bell 0.075 sec  
F1 DATA PROCESSING  
Sine bell 0.074 sec  
FT size 1024 x 1024  
Total time 21 min, 7 sec

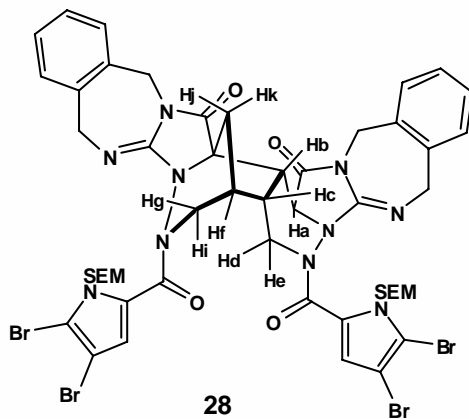

Solvent: CD3CN  
400 MHz

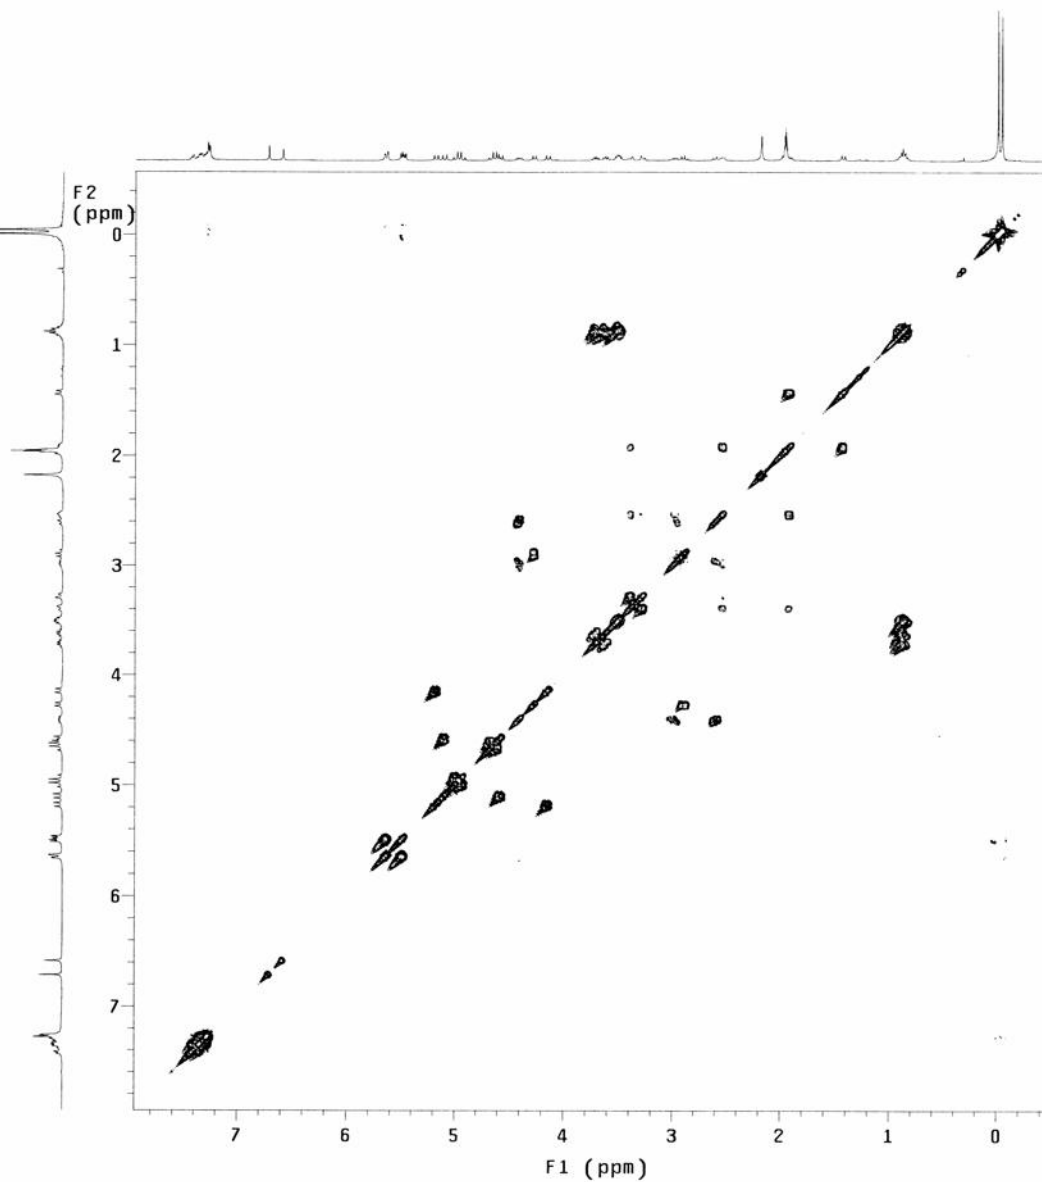

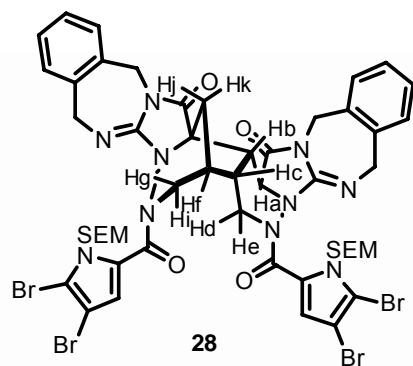

Solvent: CDCl<sub>3</sub>

75 MHz

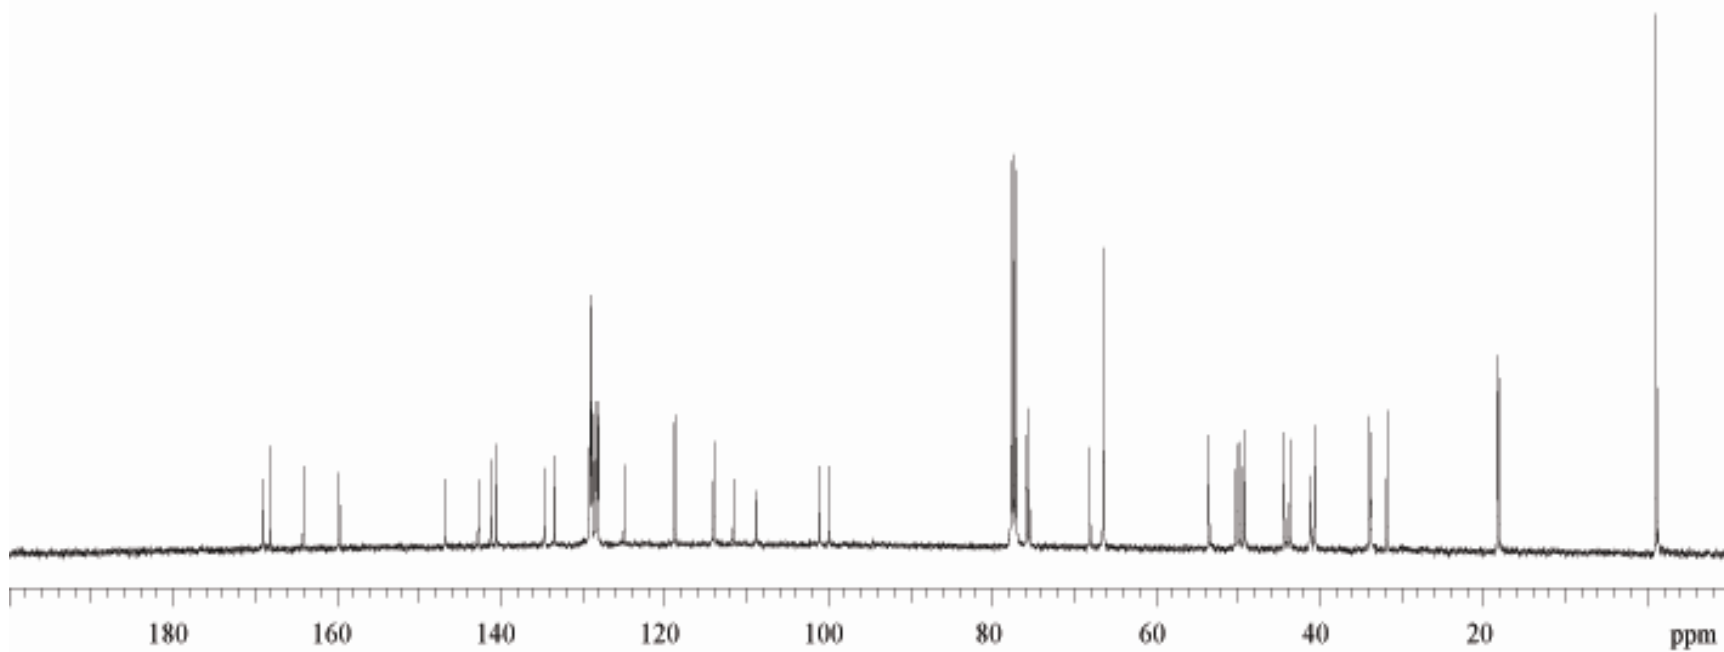



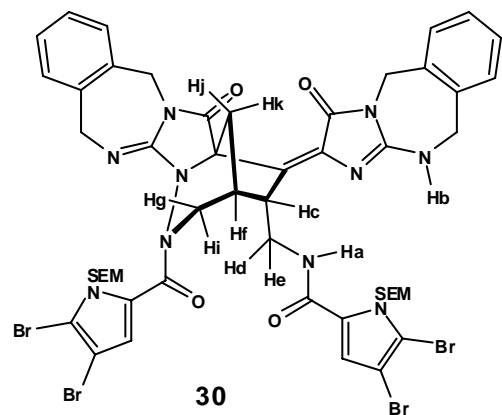

Solvent: CD<sub>3</sub>CN  
Temp: 50 °C; 400 MHz

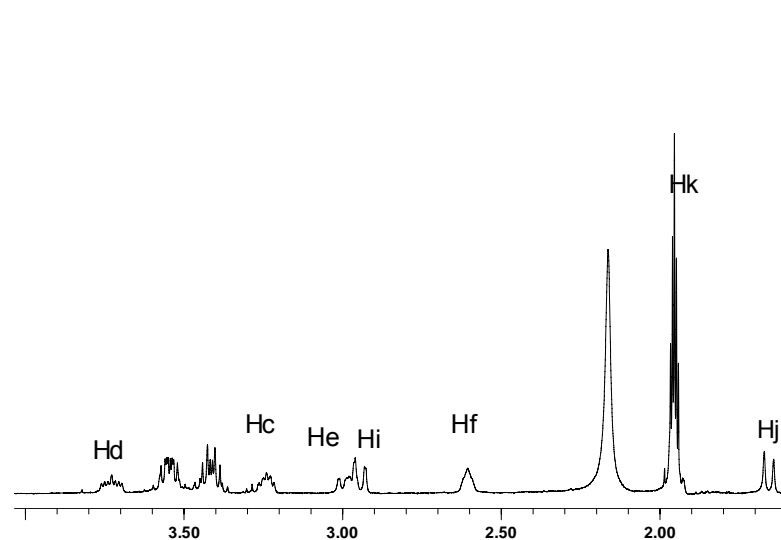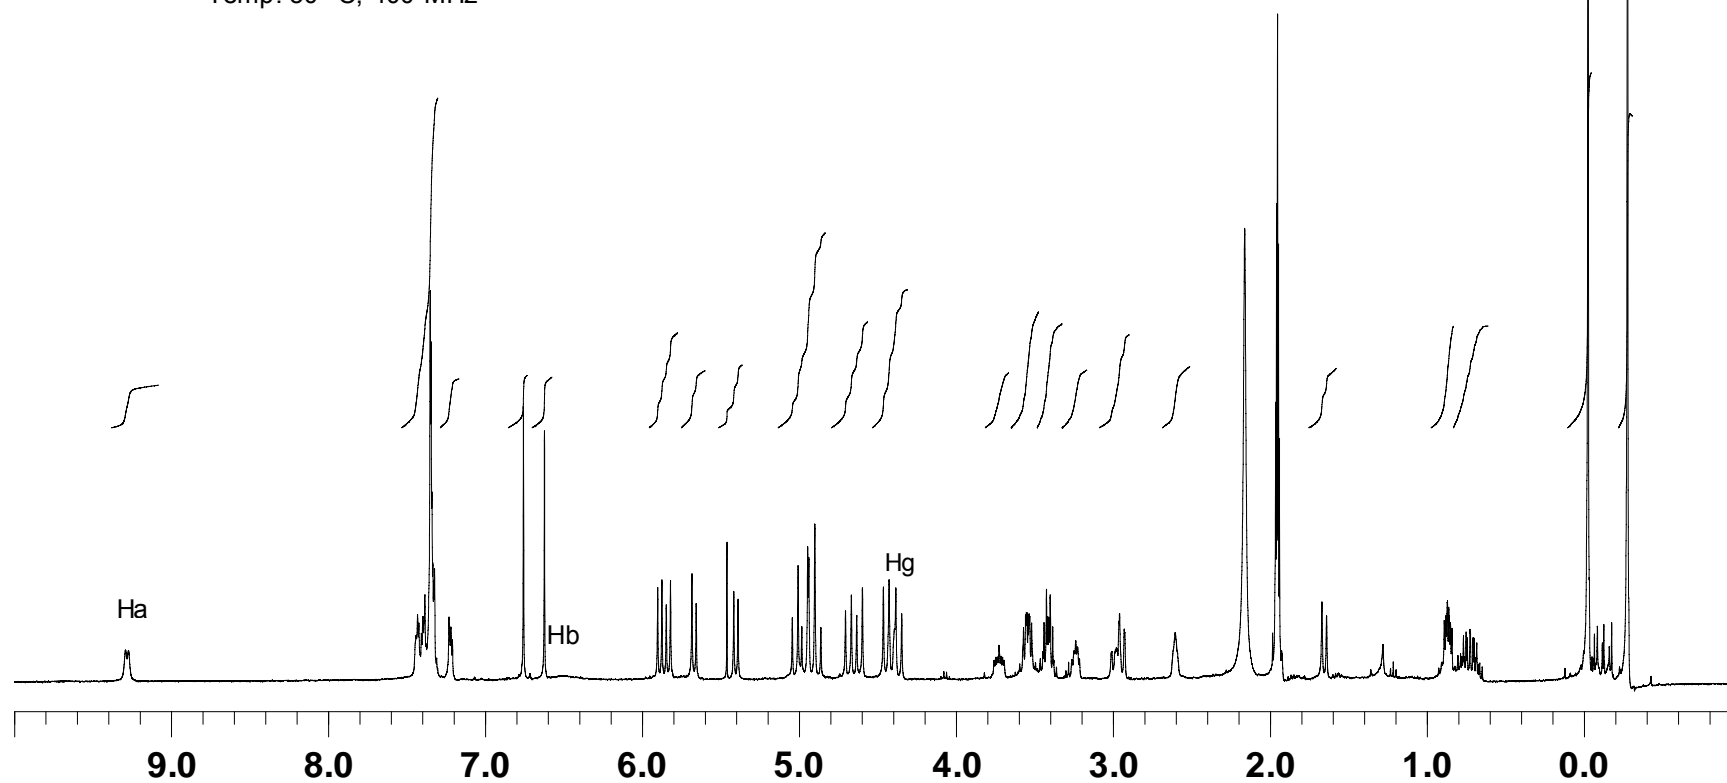

STANDARD 1H OBSERVE

Pulse Sequence: relayh

Solvent: CD3CN  
Ambient temperature  
INOVA-400 "pele400"

Relax. delay 1.000 sec  
COSY 90-45  
Acq. time 0.240 sec  
Width 4265.8 Hz  
2D Width 4265.8 Hz  
4 repetitions  
500 increments  
OBSERVE H1, 399.7814203 MHz  
DATA PROCESSING  
Sine bell 0.120 sec  
F1 DATA PROCESSING  
Sine bell 0.121 sec  
FT size 2048 x 2048  
Total time 43 min, 40 sec

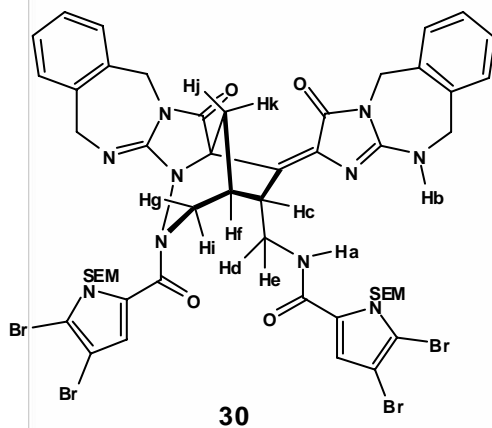

Solvent: CD3CN  
400 MHz

F2  
(ppm)

-0

1

2

3

4

5

6

7

8

9

F1 (ppm)

9

8

7

6

5

4

3

2

1

-0

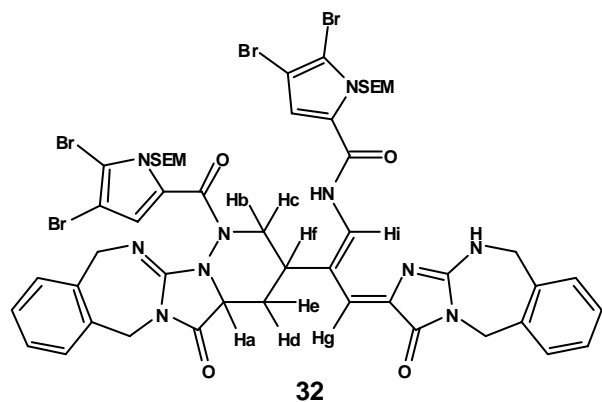

one isomer  
unknown stereochemistry

Solvent: CD<sub>3</sub>CN  
Temp: 50 °C; 400 MHz

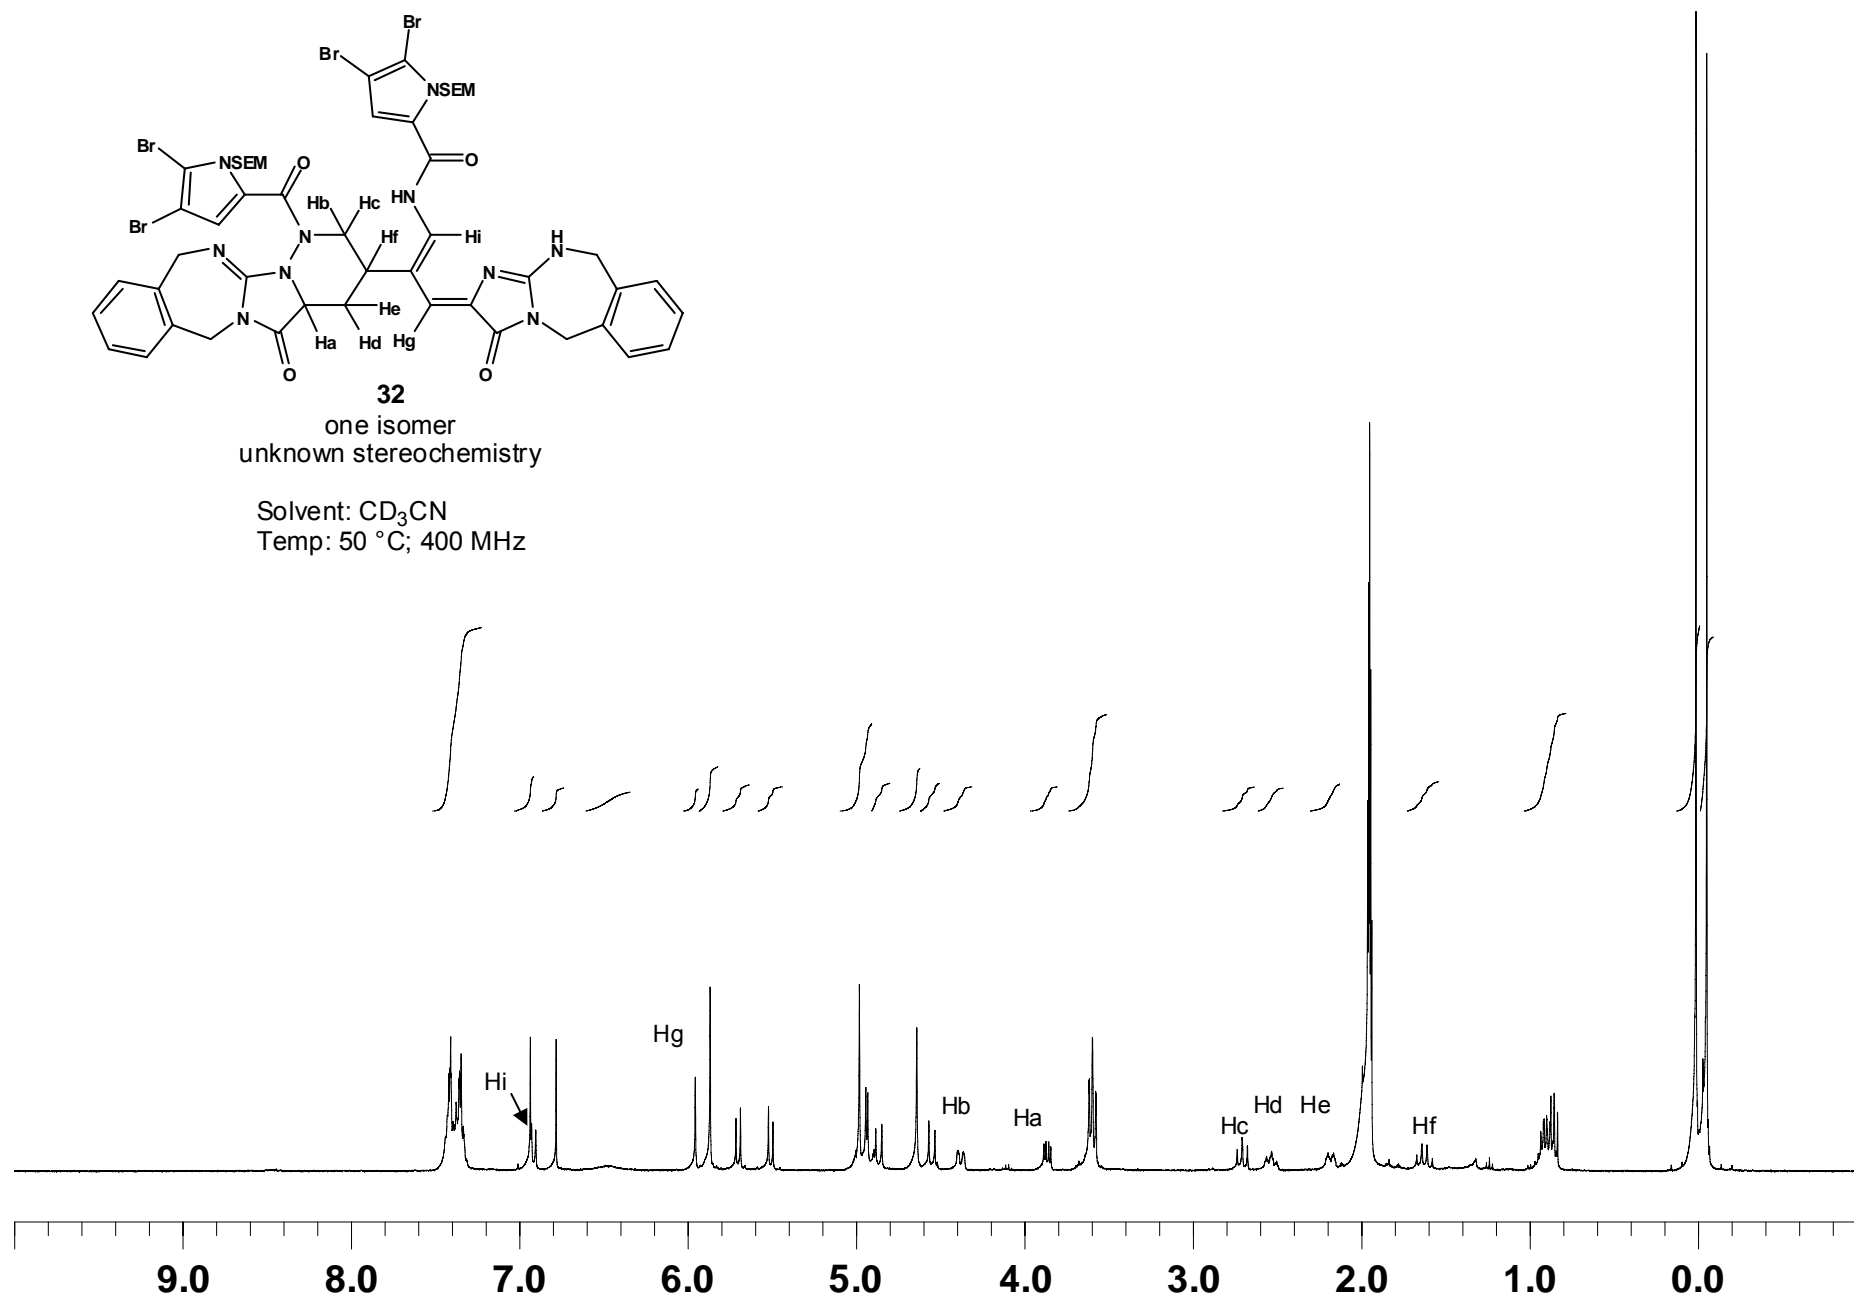

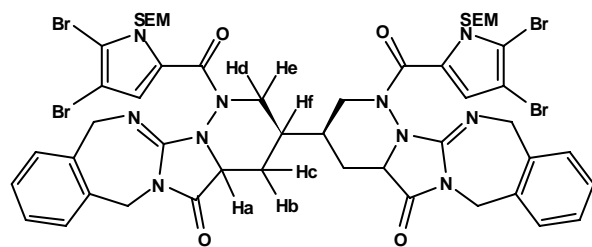

**33**

Solvent: CD<sub>3</sub>CN

Temp: 50 °C; 400 MHz

Note: Spectral data appears to indicate one isomer. However, TLC and PTLC suggest a mixture of two closely related species.

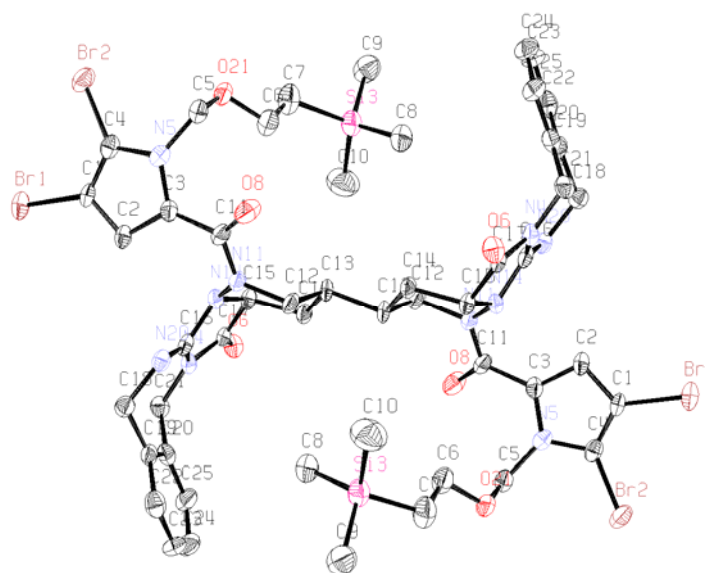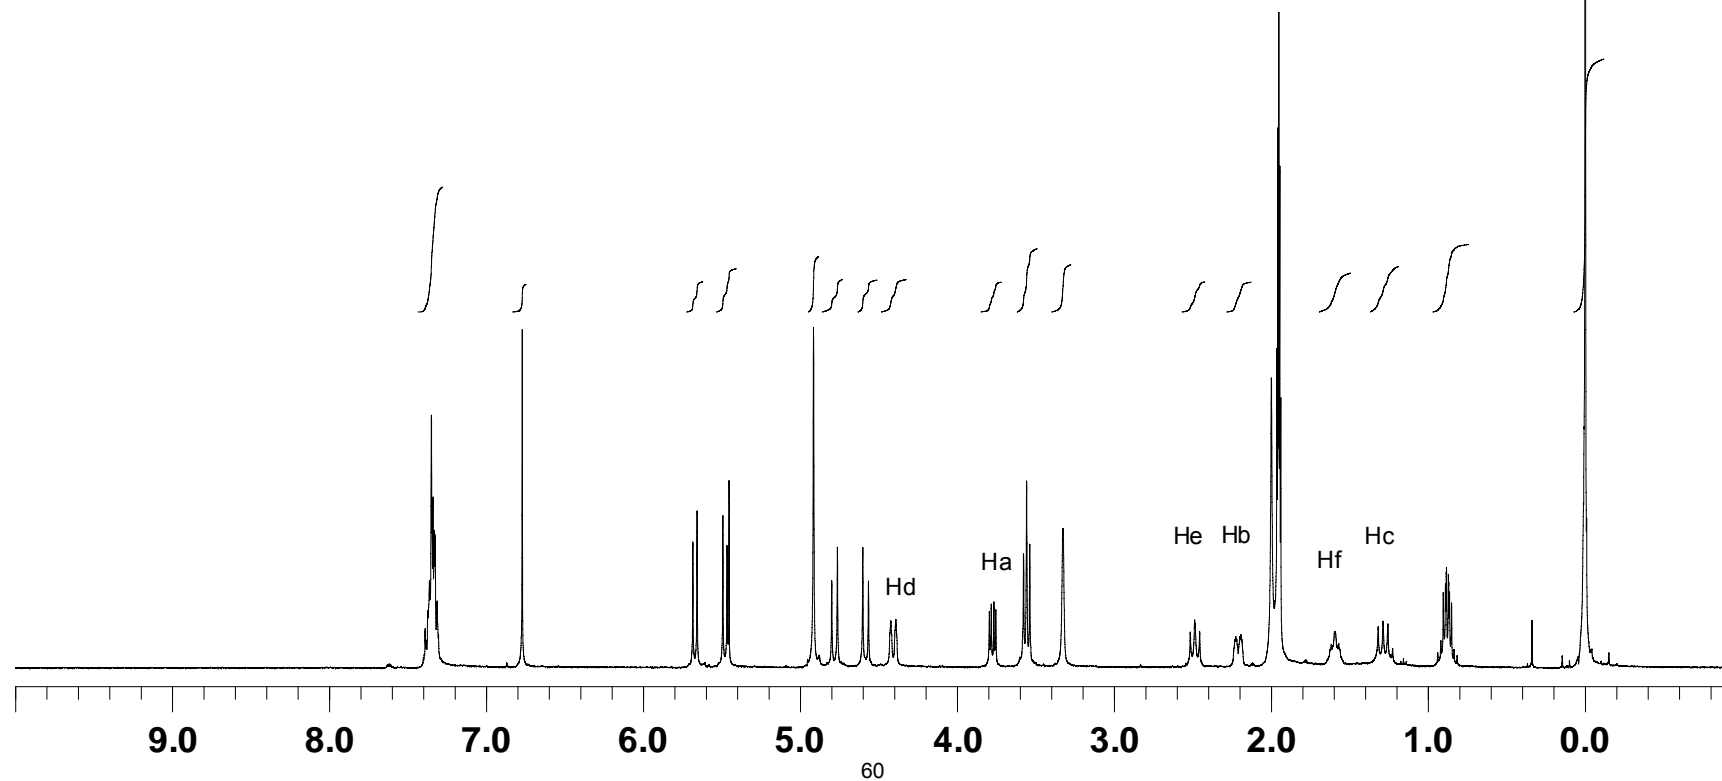

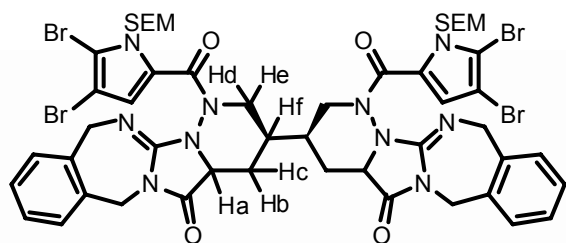

**33a + 33b**

Solvent: CDCl<sub>3</sub>

125 MHz

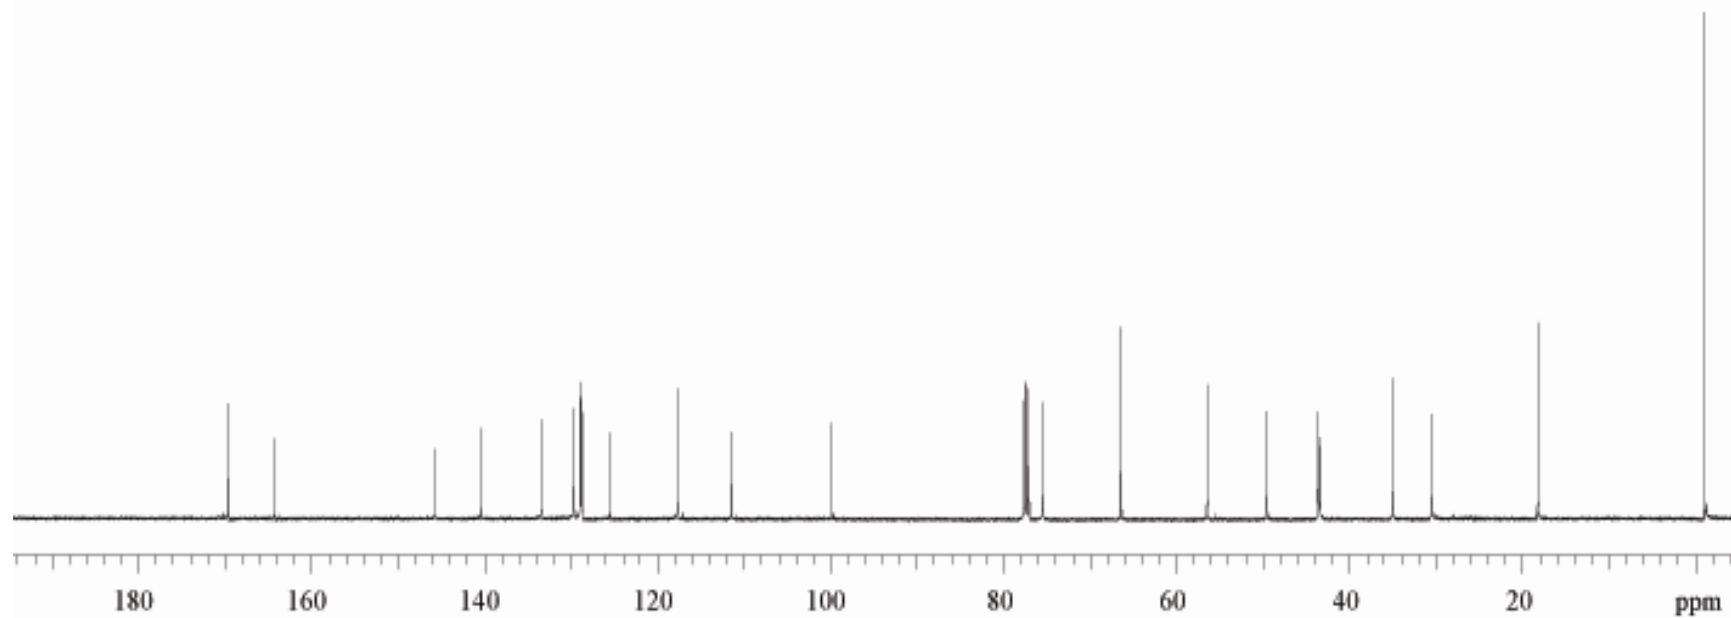

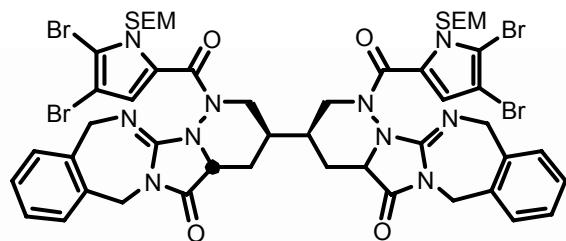

**33c**

Solvent: CDCl<sub>3</sub>

400 MHz

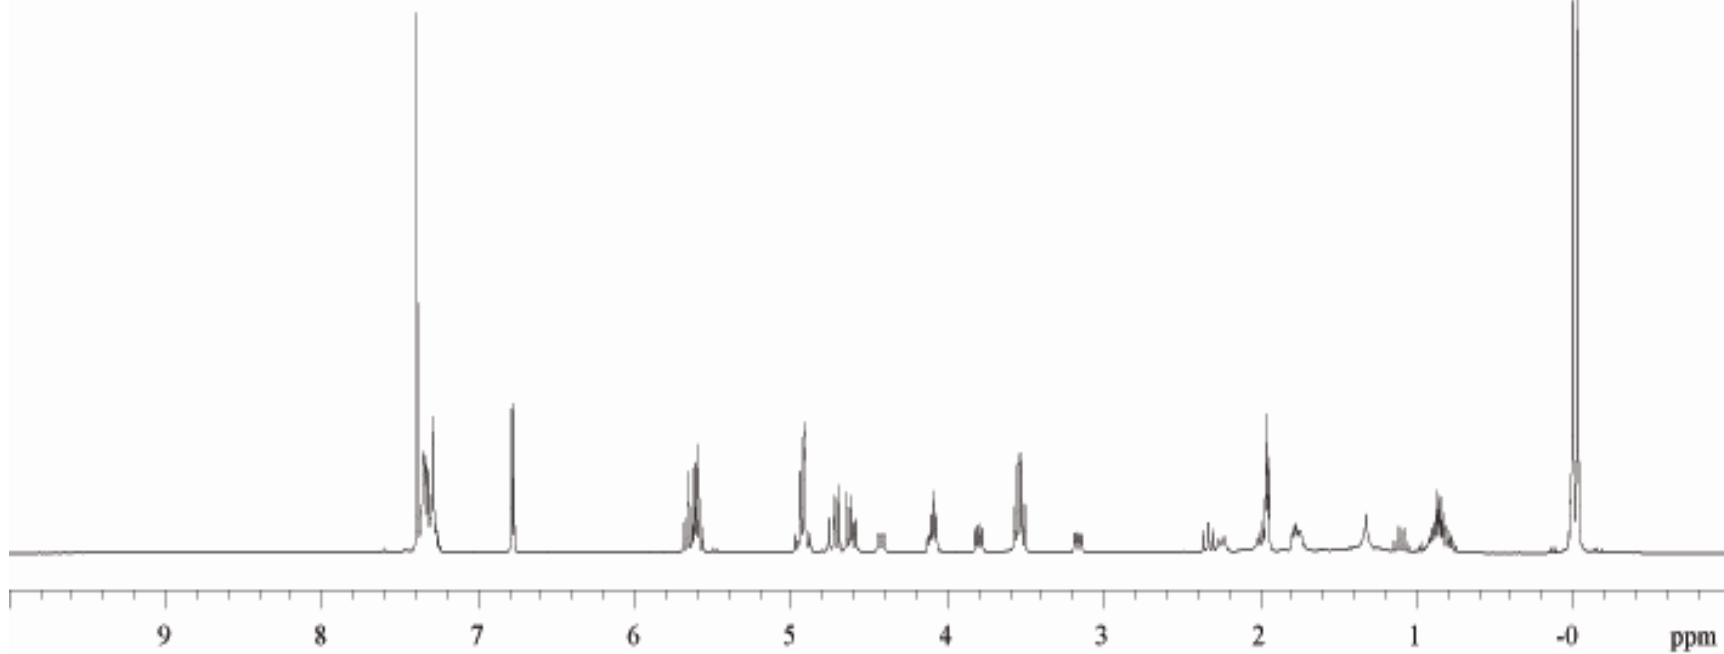

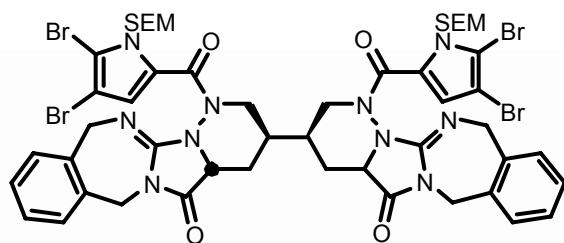

**33c**

Solvent: CDCl<sub>3</sub>

125 MHz

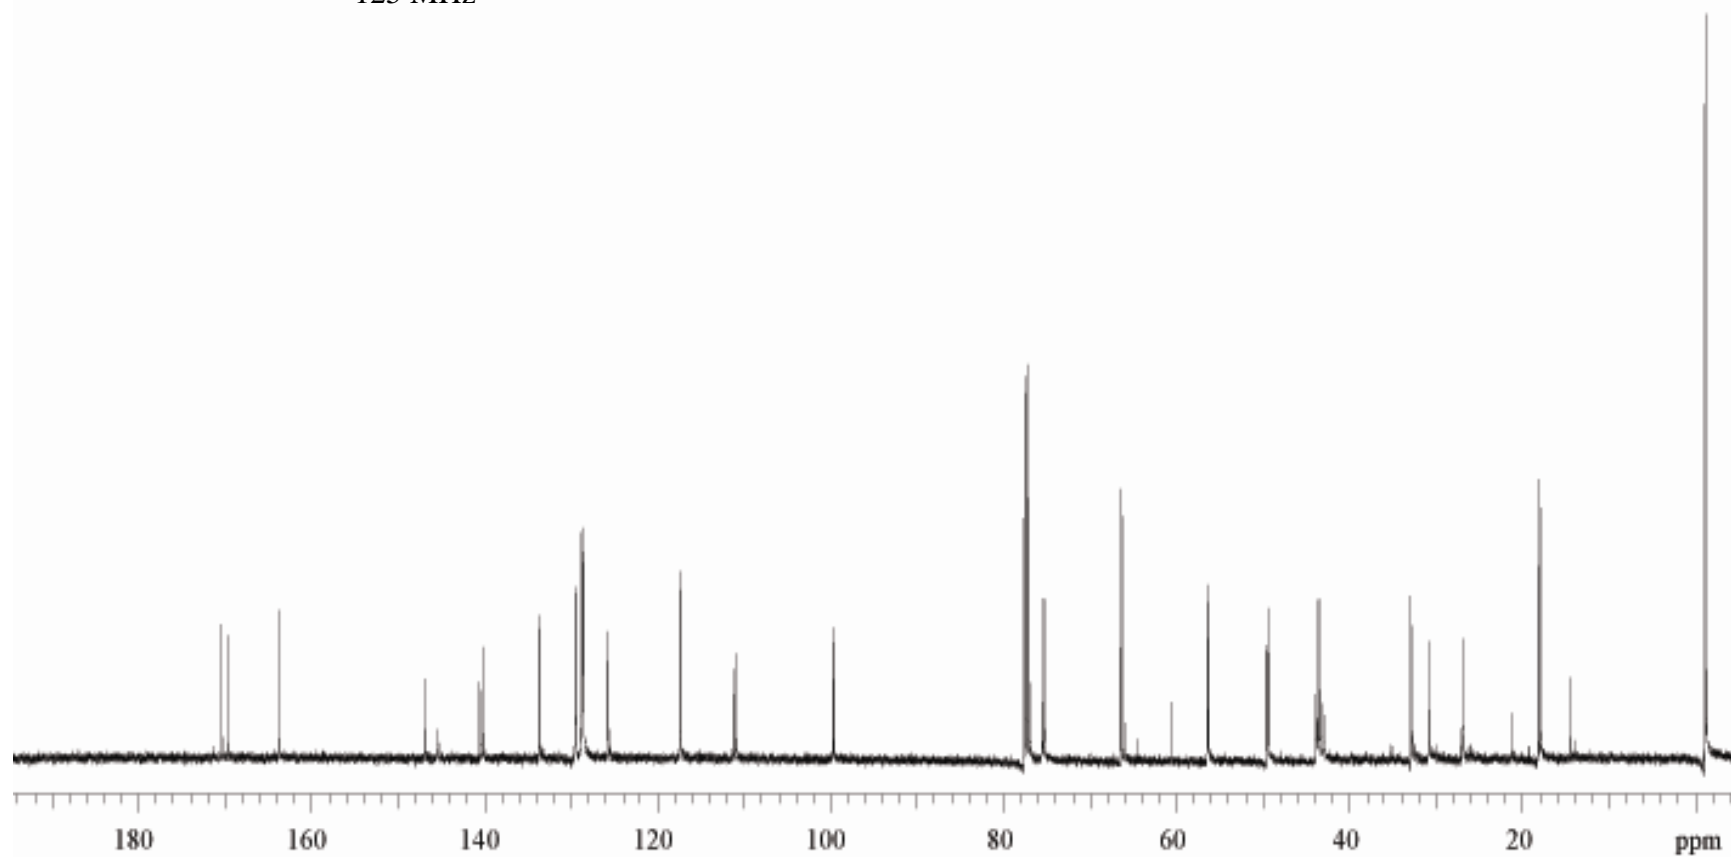

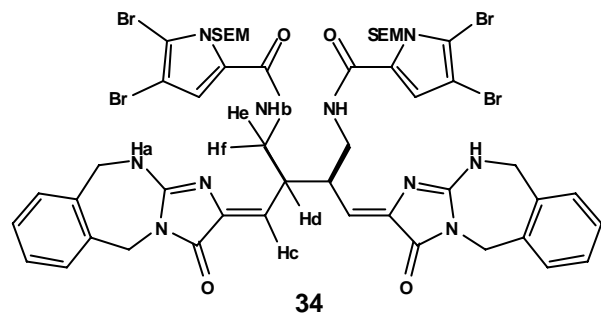

Solvent: DMSO-d<sub>6</sub>  
Temp: 50 °C; 500 MHz

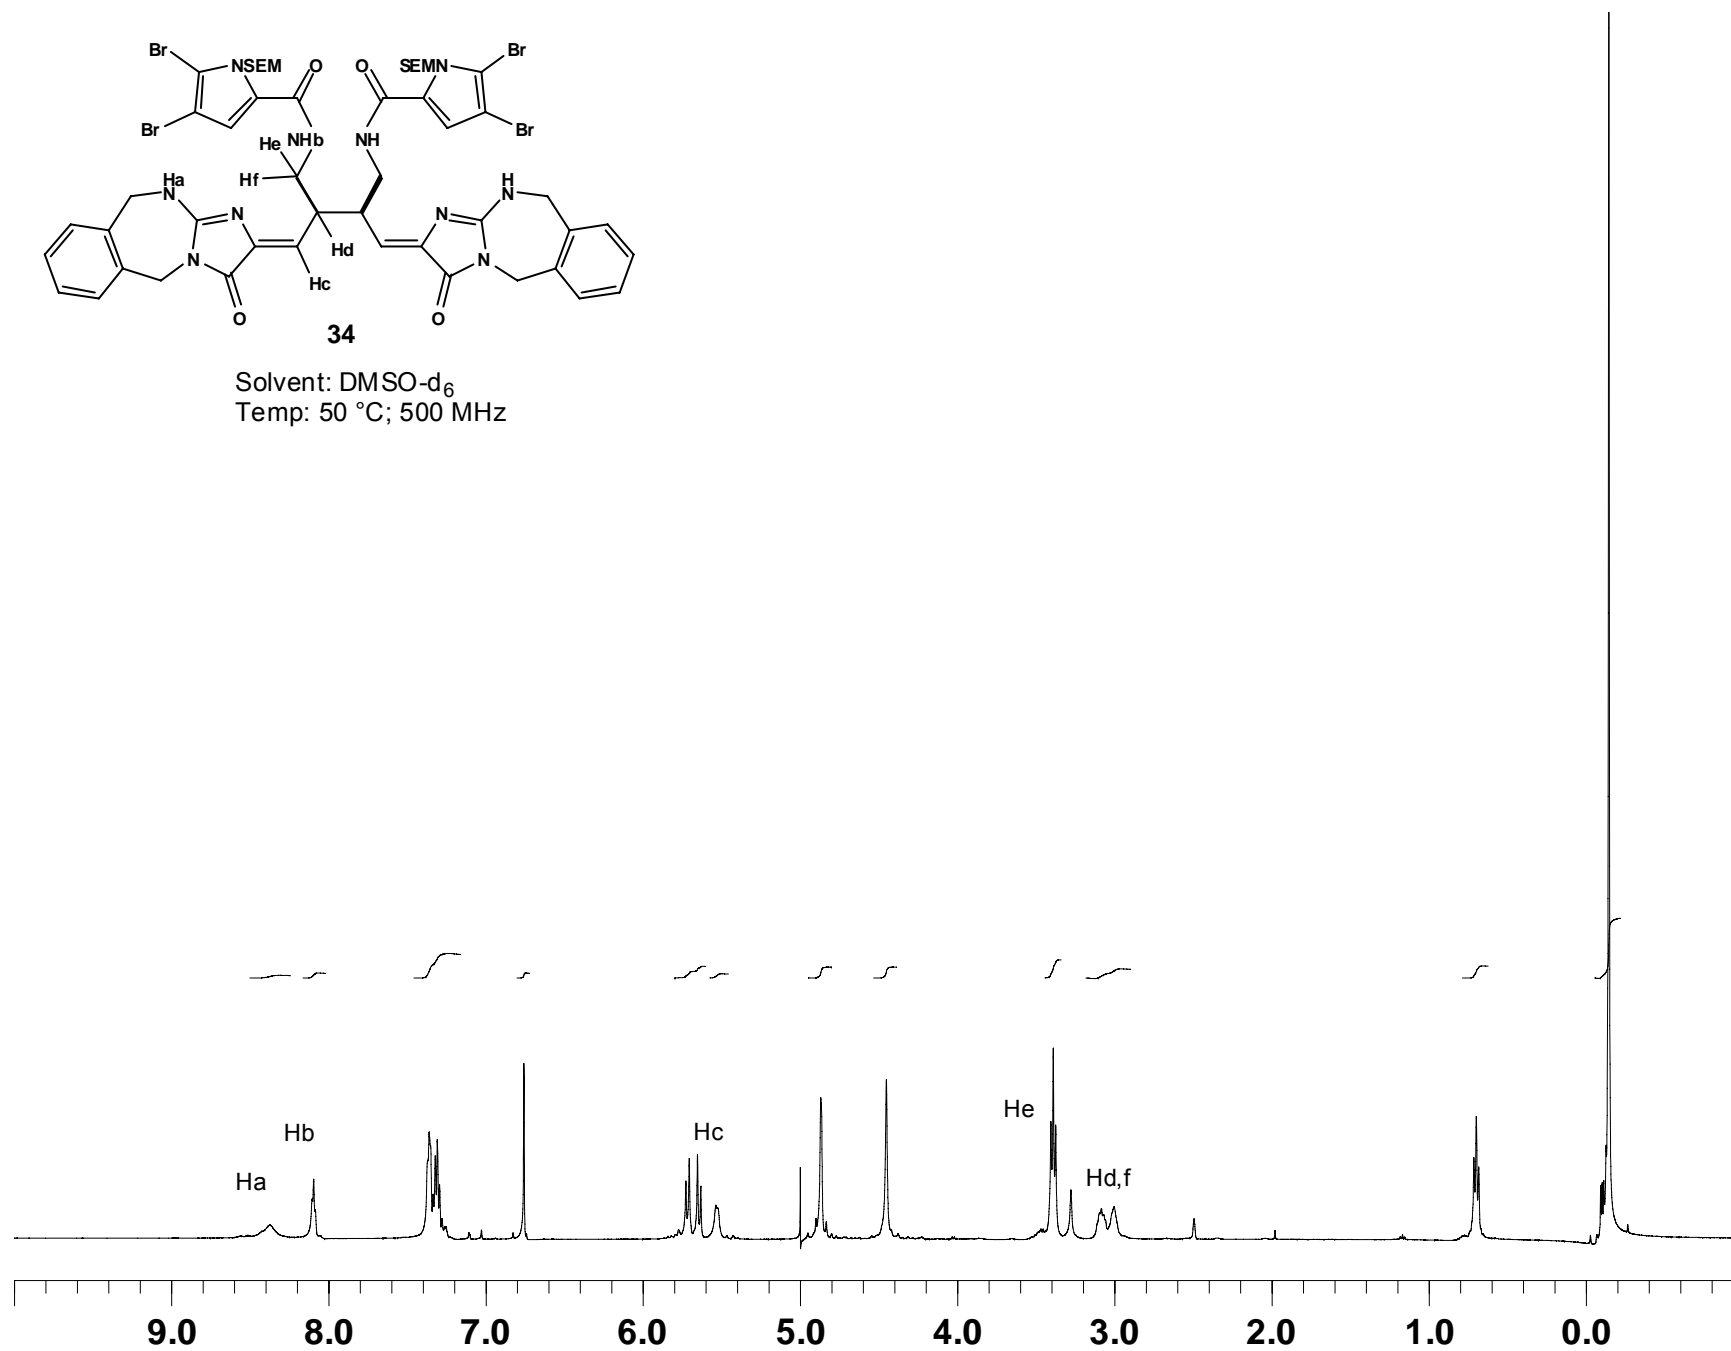



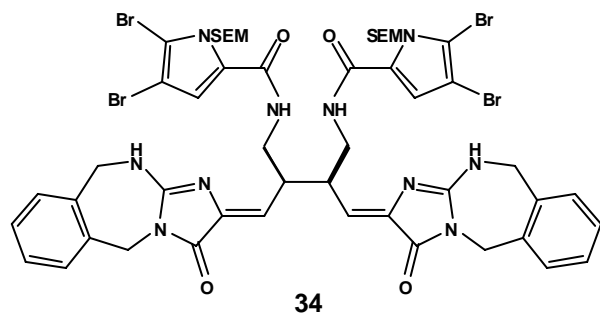

Solvent: DMSO-d<sub>6</sub>  
Temp: 50 °C; 125 MHz

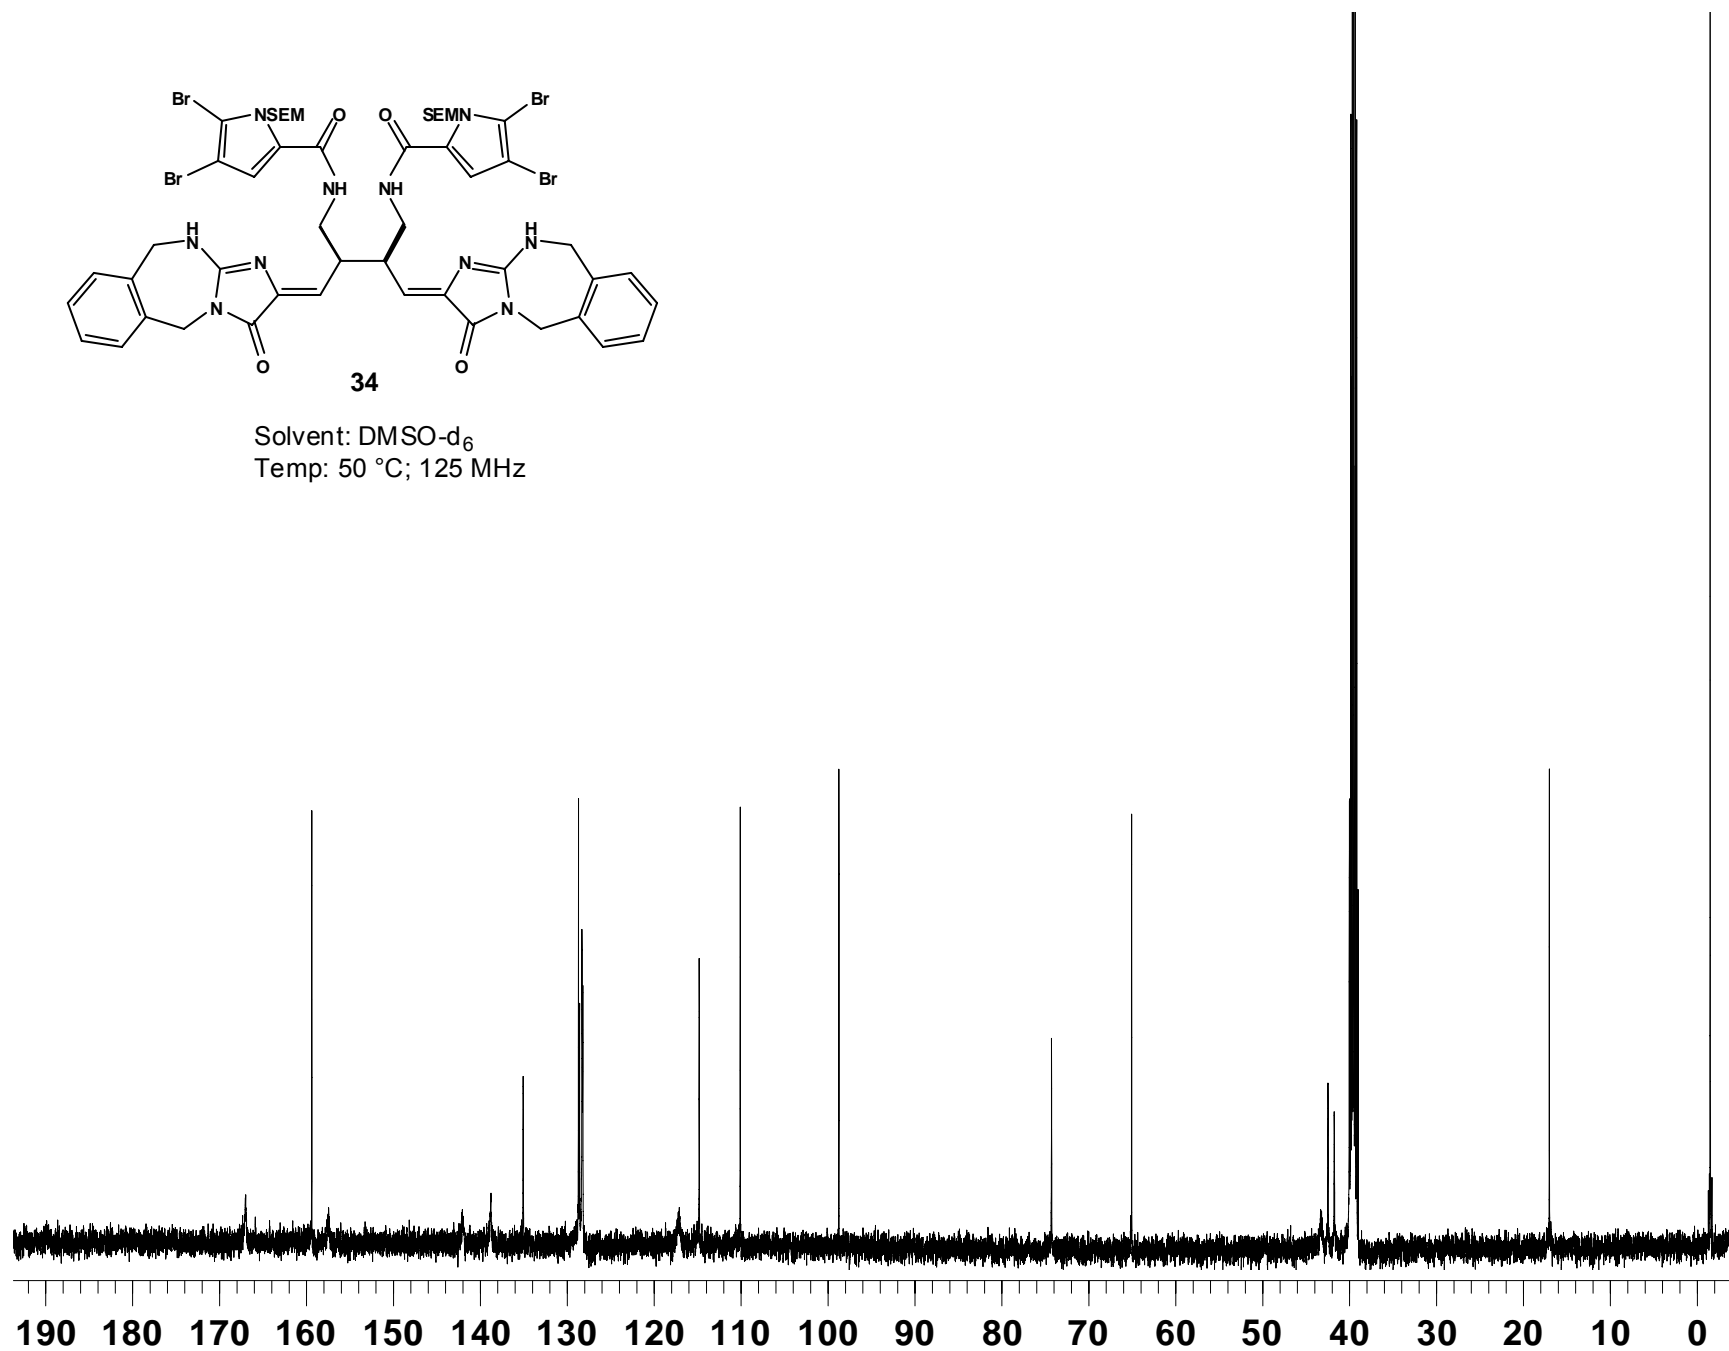

STANDARD PROTON PARAMETERS

Pulse Sequence: relayh  
 Solvent: DMSO  
 Temp. 45.0 C / 318.1 K  
 File: QL-V-bisalkylidene-HHCOsy  
 INOVA-500 "IRIS"

Relax. delay 1.000 sec  
 COSY 90-45  
 Acq. time 0.220 sec  
 Width 4646.0 Hz  
 2D Width 4646.0 Hz  
 4 repetitions  
 512 increments  
 OBSERVE H1, 499.7802429 MHz  
 DATA PROCESSING  
 Sine bell 0.110 sec  
 F1 DATA PROCESSING  
 Sine bell 0.055 sec  
 FT size 2048 x 2048  
 Total time 43 min, 59 sec

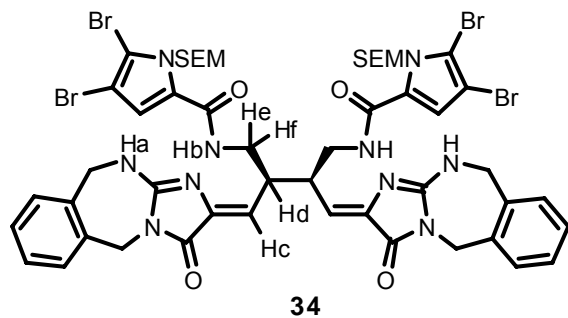

Solvent: CDCl<sub>3</sub>  
 500 MHz

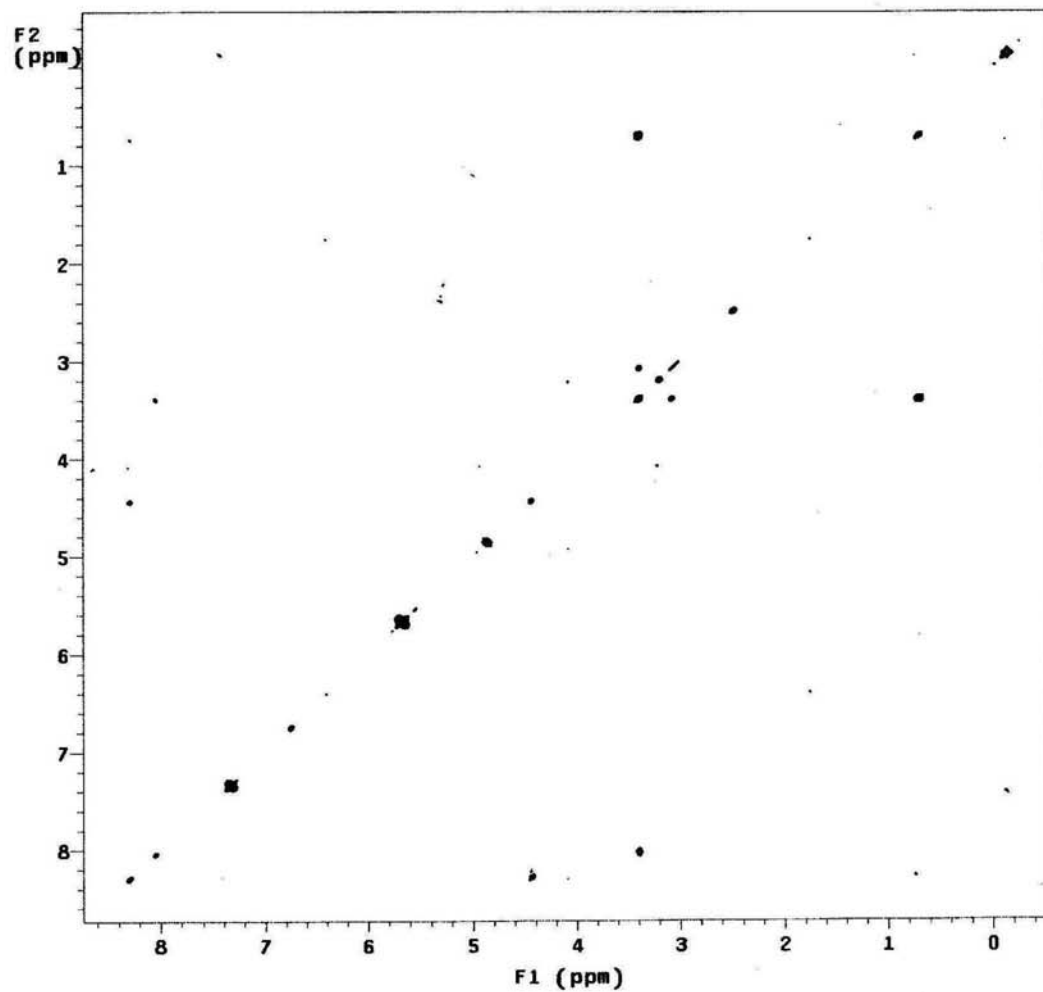

STANDARD PROTON PARAMETERS

Pulse Sequence: noesy  
 Solvent: DMSO  
 Temp. 34.0 C / 307.1 K  
 File: June13-noesy  
 INOVA-500 "IRIS"

Relax. delay 6.000 sec  
 Mixing 0.200 sec  
 Acq. time 0.204 sec  
 Width 5024.5 Hz  
 2D Width 5024.5 Hz  
 16 repetitions  
 2 x 200 increments  
 OBSERVE H1, 499.7802429 MHz  
 DATA PROCESSING  
 Gauss apodization 0.081 sec  
 F1 DATA PROCESSING  
 Gauss apodization 0.016 sec  
 FT size 2048 x 1024  
 Total time 11 hr, 30 min, 5 sec

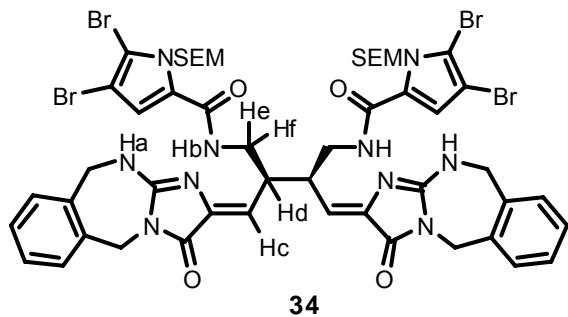

Solvent: CDCl<sub>3</sub>  
 500 MHz

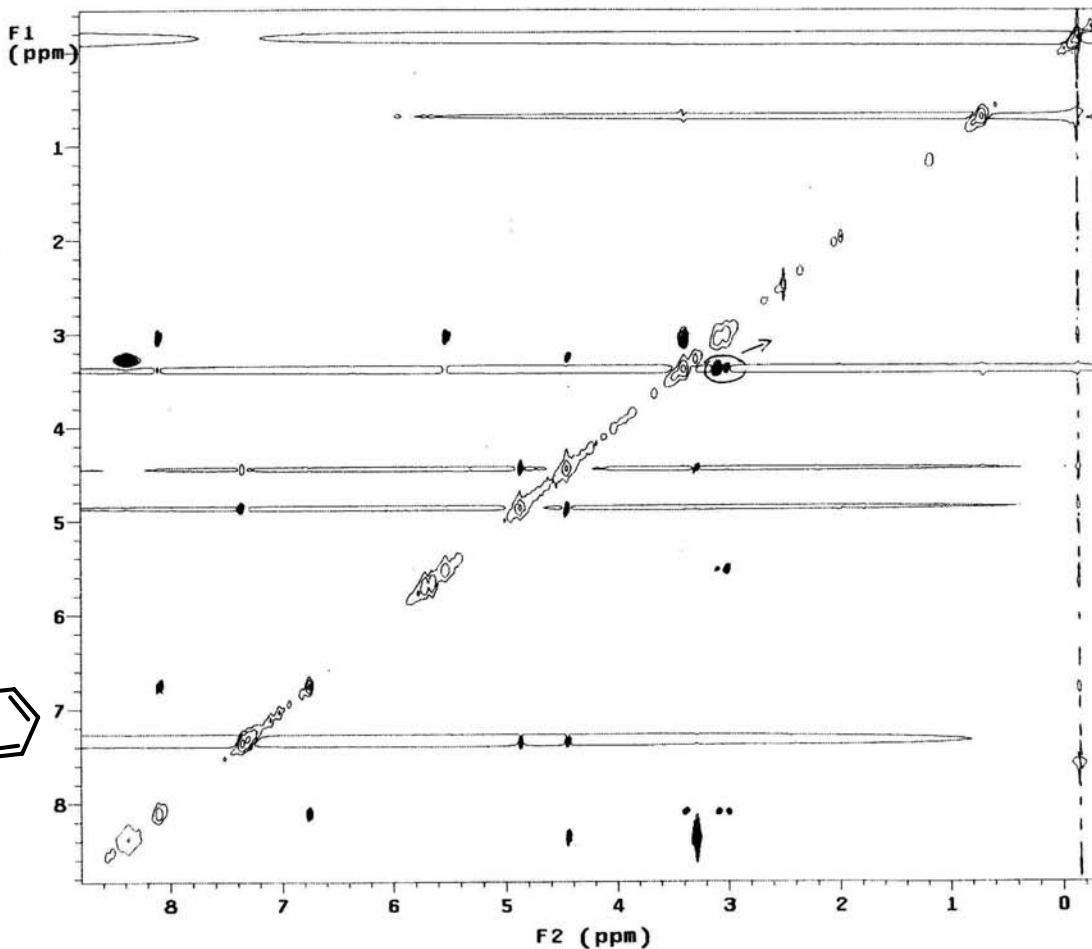

STANDARD PROTON PARAMETERS

Pulse Sequence: gHMQC

Solvent: DMSO

Temp. 34.0 C / 307.1 K

File: QL-V-bisalkylidene-HMQC

INOVA-500 "IRIS"

Relax. delay 1.000 sec

Acq. time 0.196 sec

Width 5213.8 Hz

2D Width 22008.3 Hz

48 repetitions

2 x 360 increments

OBSERVE H1, 499.7802429 MHz

DECOUPLE C13, 125.6809158 MHz

Power 34 dB

on during acquisition

off during delay

GARP-1 modulated

DATA PROCESSING

Gauss apodization 0.070 sec

F1 DATA PROCESSING

Gauss apodization 0.007 sec

FT size 2048 x 2048

Total time 12 hr, 5 min, 7 sec

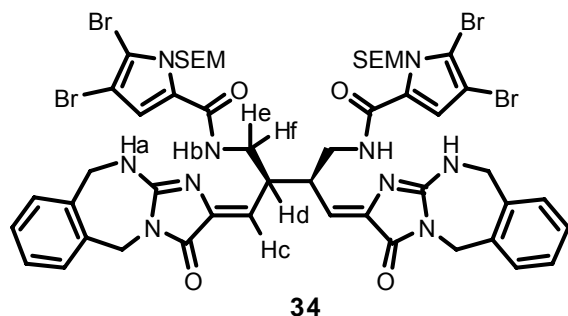

Solvent: CDCl<sub>3</sub>

500 MHz

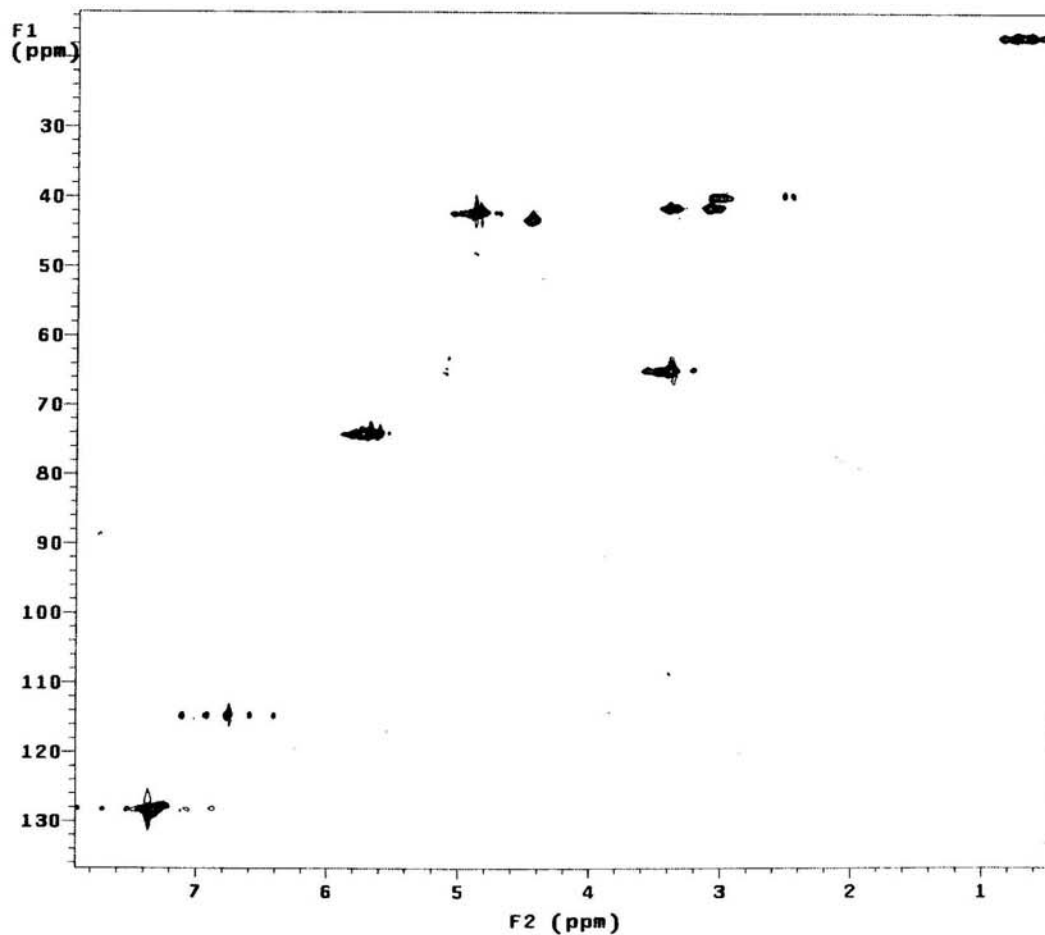

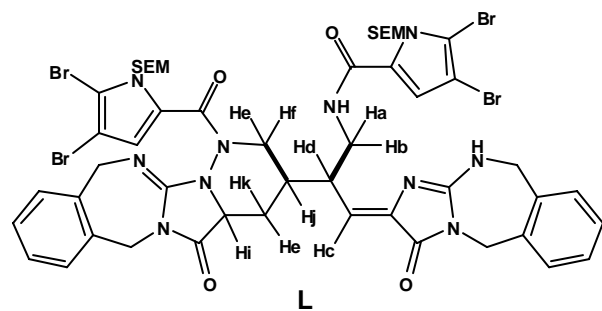

Solvent: CD<sub>3</sub>CN  
Temp: 50 °C; 400 MHz

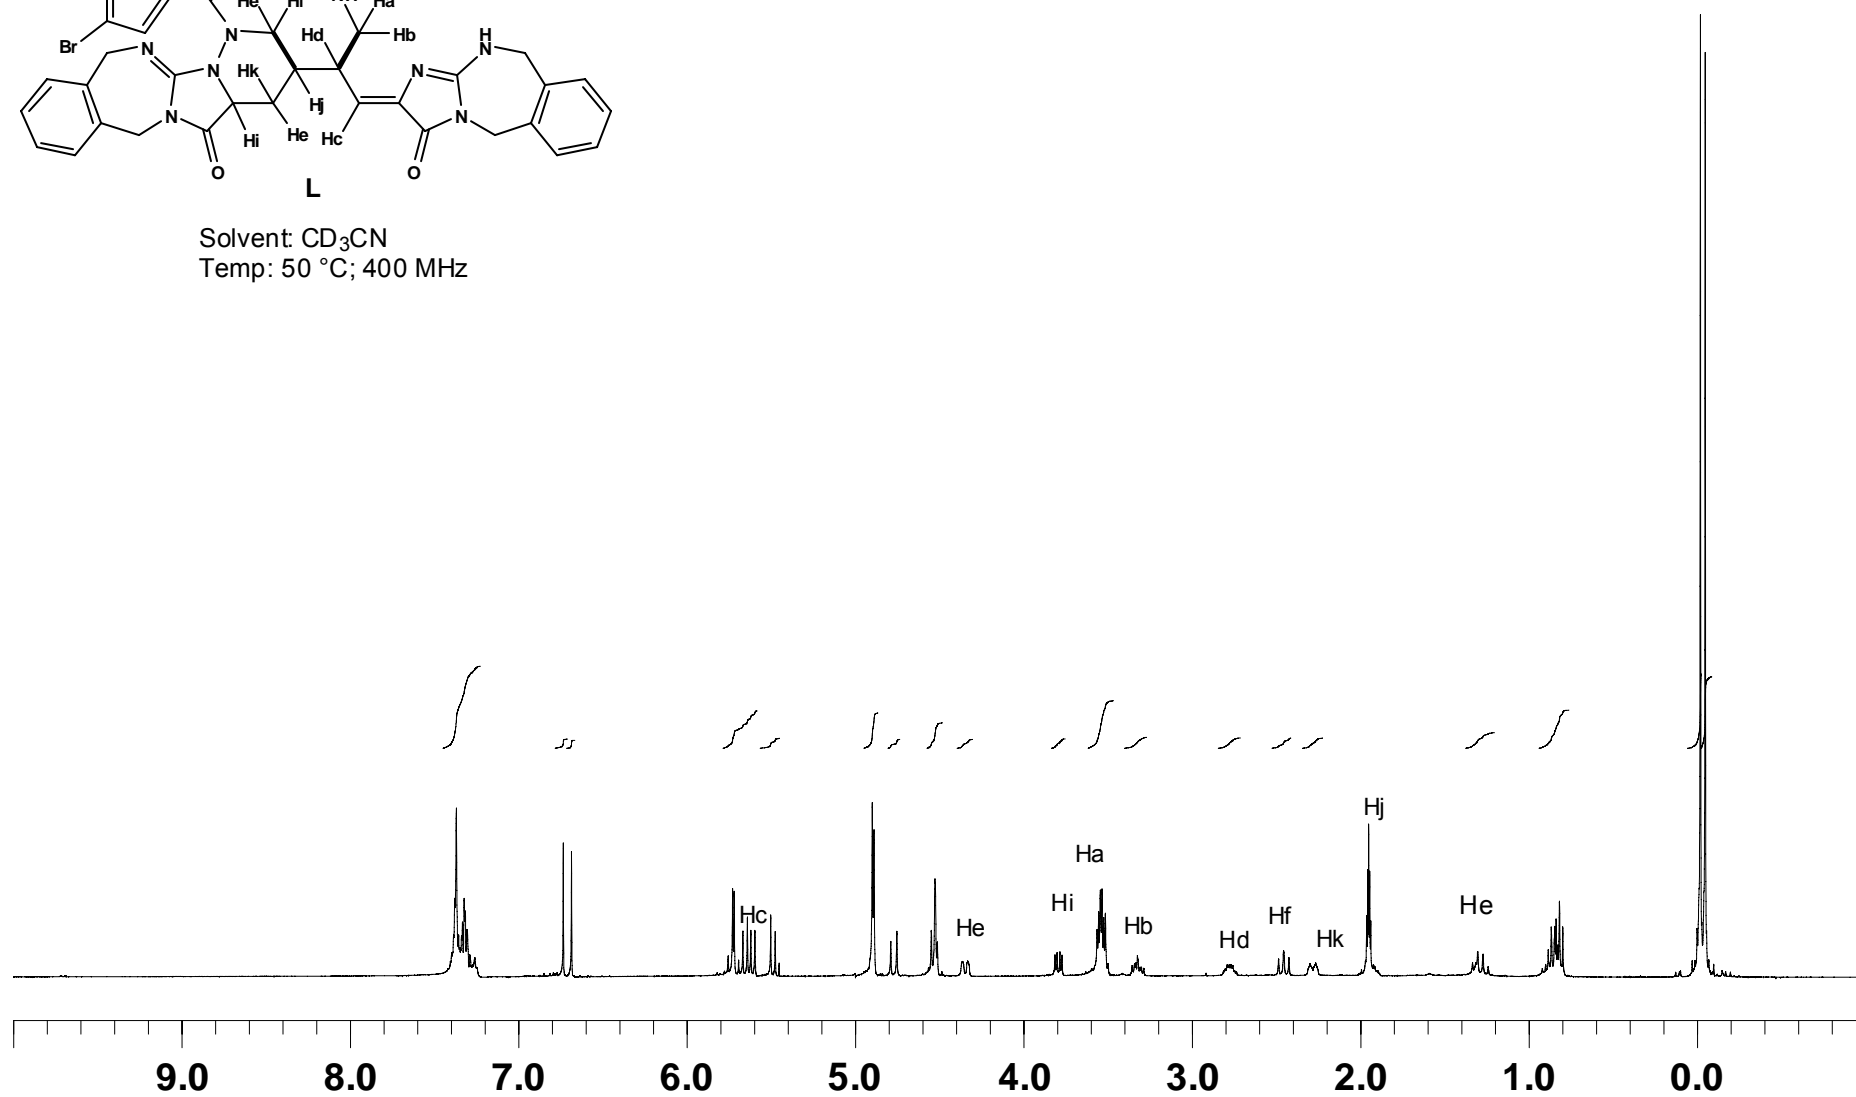

STANDARD 1H OBSERVE

Pulse Sequence: relayh

Solvent: CD3CN

Temp. 70.0 C / 343.1 K

INOVA-400 "pele400"

Relax. delay 1.000 sec

COSY 90-45

Acq. time 0.141 sec

Width 3627.0 Hz

2D Width 3627.0 Hz

4 repetitions

500 increments

OBSERVE H1, 399.7814203 MHz

DATA PROCESSING

Sine bell 0.071 sec

F1 DATA PROCESSING

Sine bell 0.071 sec

FT size 1024 x 1024

Total time 40 min, 42 sec

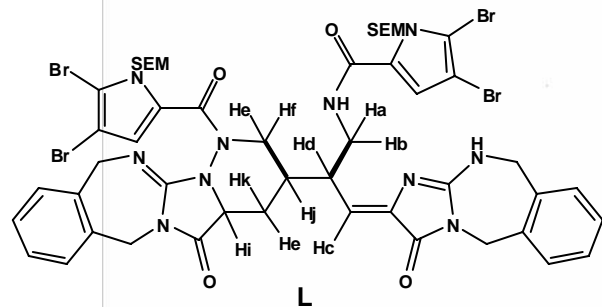

Solvent: CD3CN

400 MHz

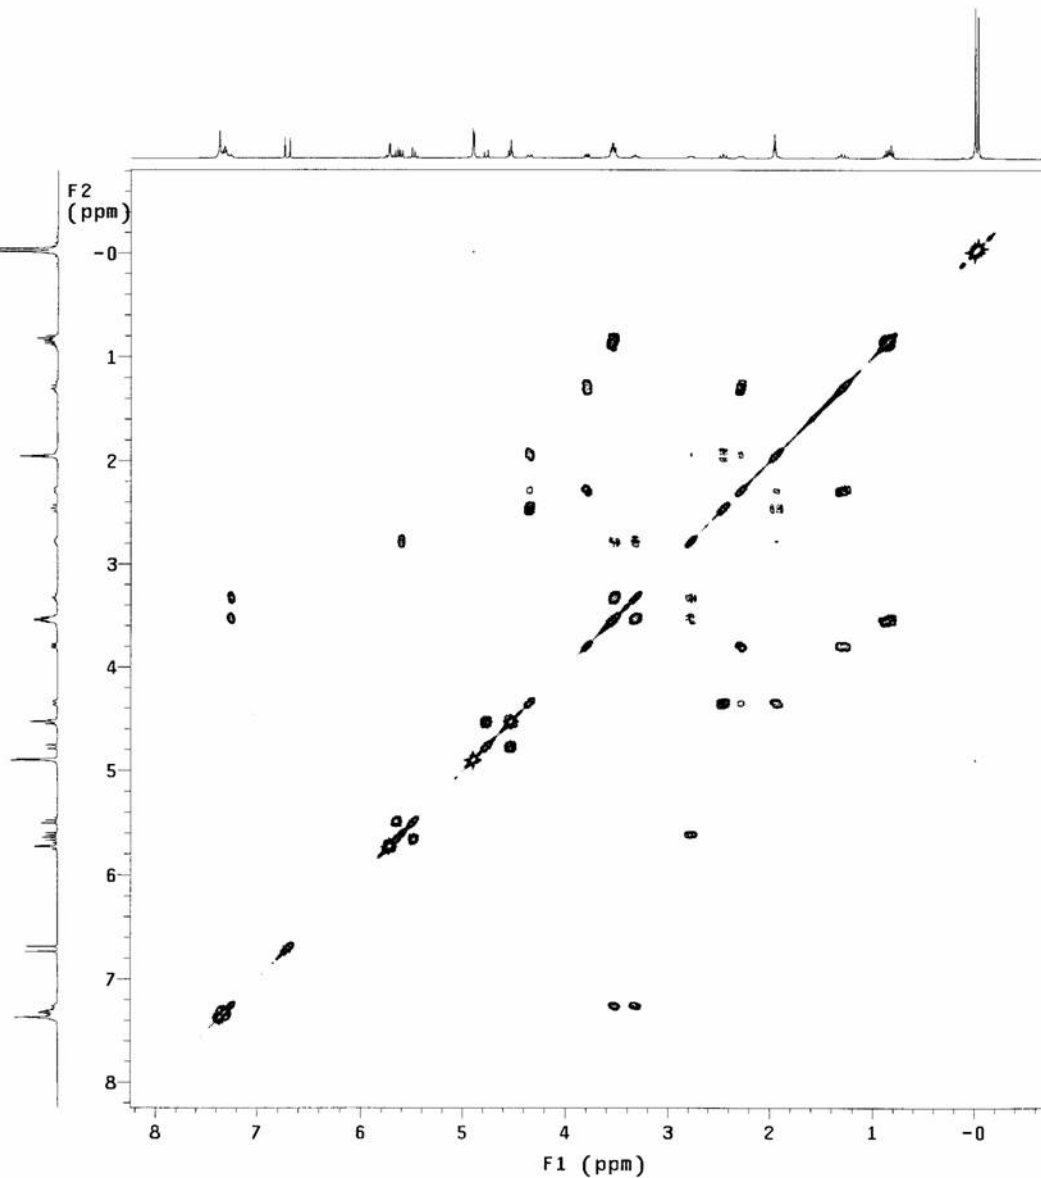

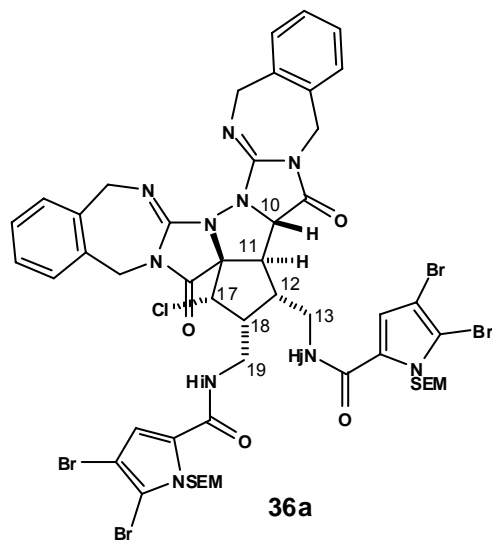

Solvent: CD<sub>3</sub>CN  
Temp: 25 °C; 500 MHz

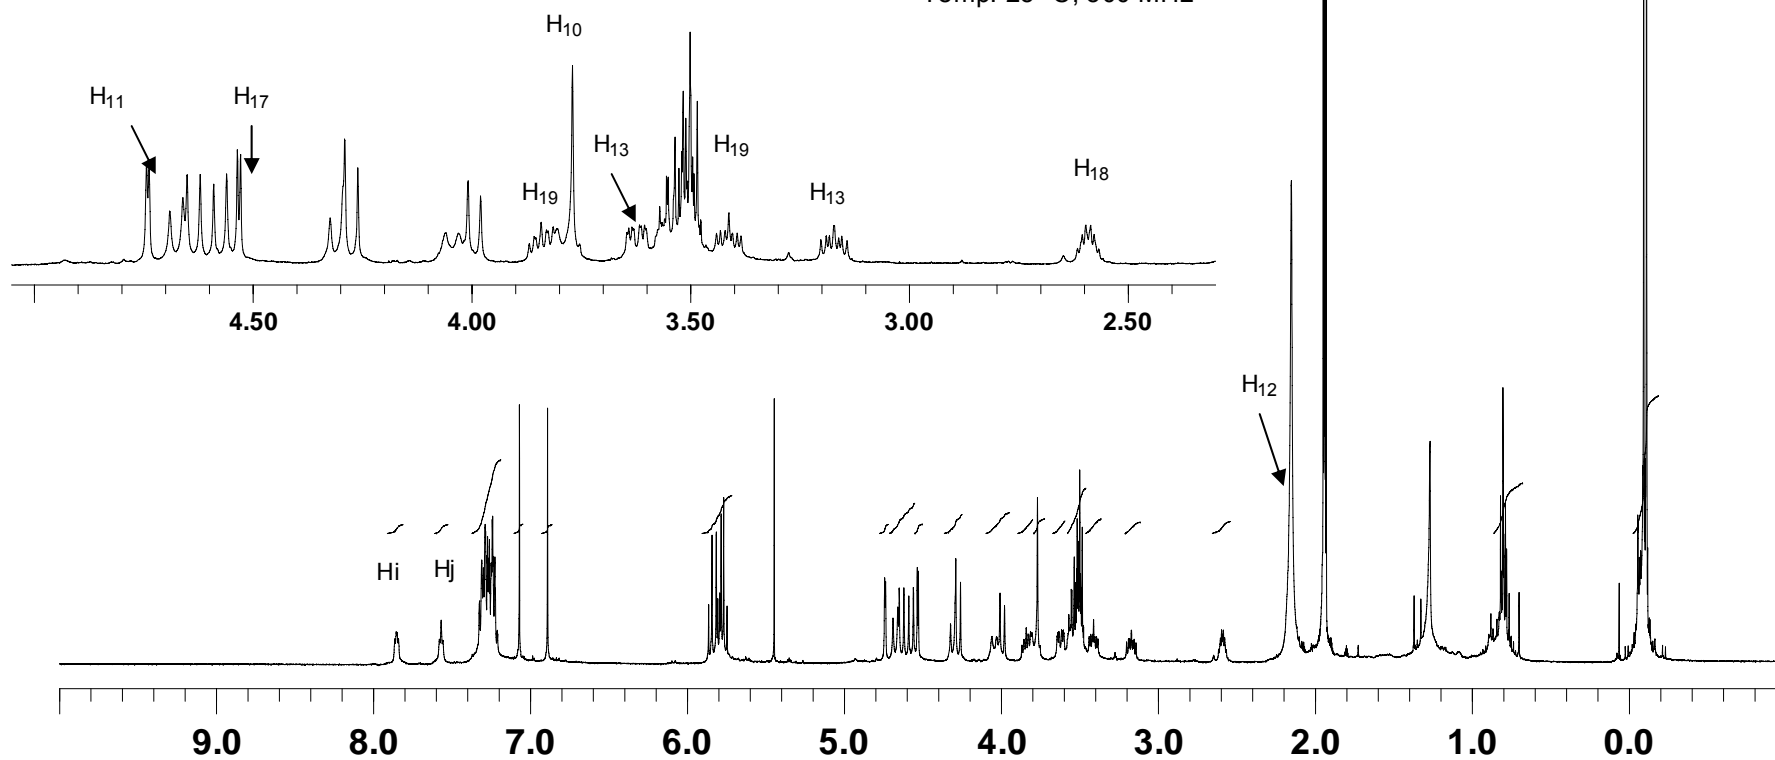

V-131-cosy

Pulse Sequence: relayh

Solvent: CD3CN

Temp. 24.2 C / 297.4 K

INOVA-500 "pele500"

Relax. delay 2.000 sec

COSY 90-90

Acq. time 0.224 sec

Width 4577.7 Hz

2D Width 4571.4 Hz

8 repetitions

200 increments

OBSERVE H1, 499.7271246 MHz

DATA PROCESSING

Sine bell 0.112 sec

F1 DATA PROCESSING

Sine bell 0.021 sec

FT size 2048 x 2048

Total time 1 hr, 27 sec

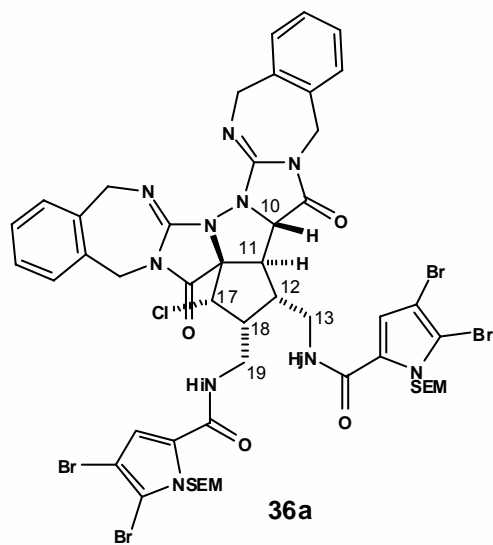

Solvent: CD3CN

500 MHz

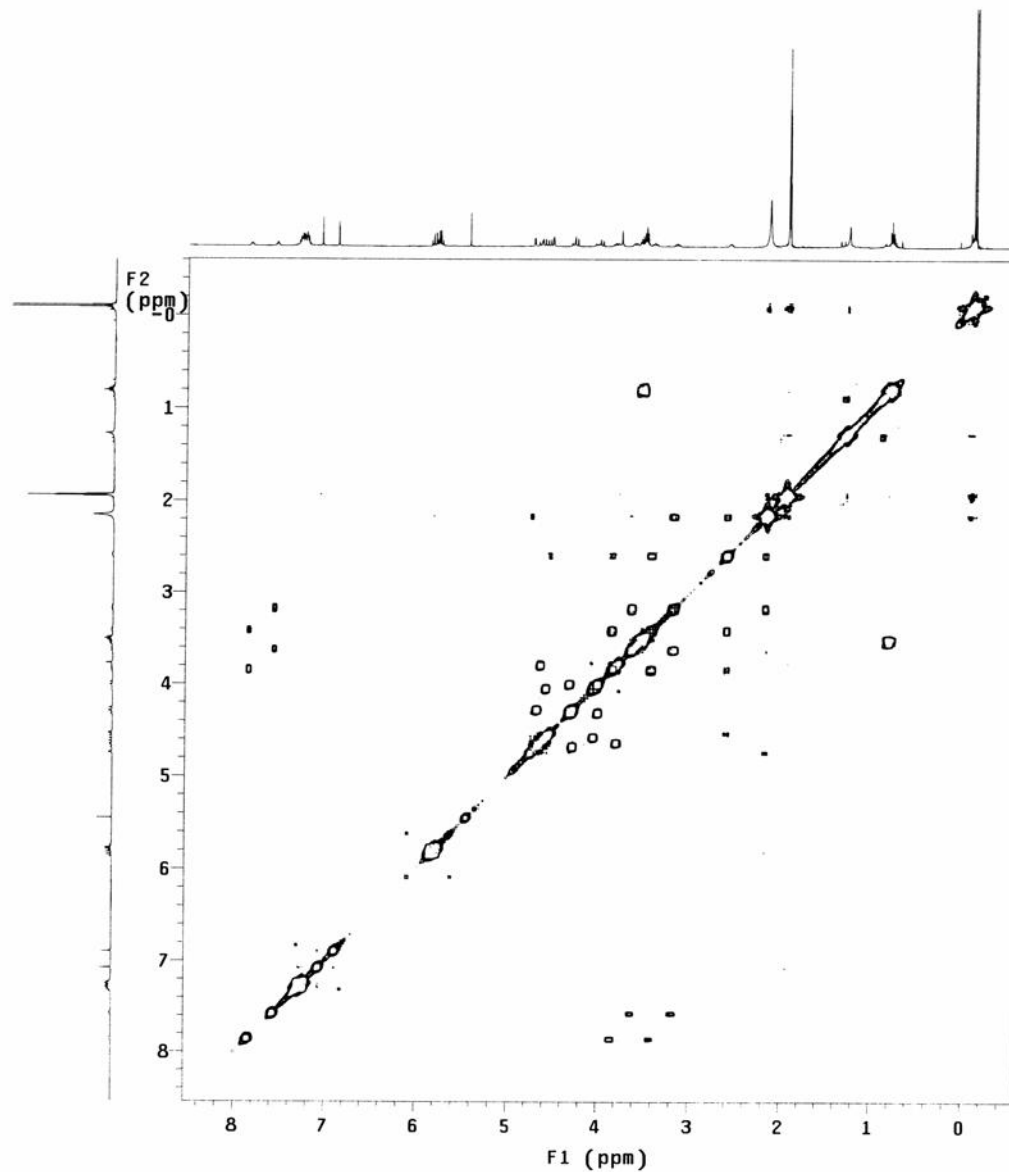



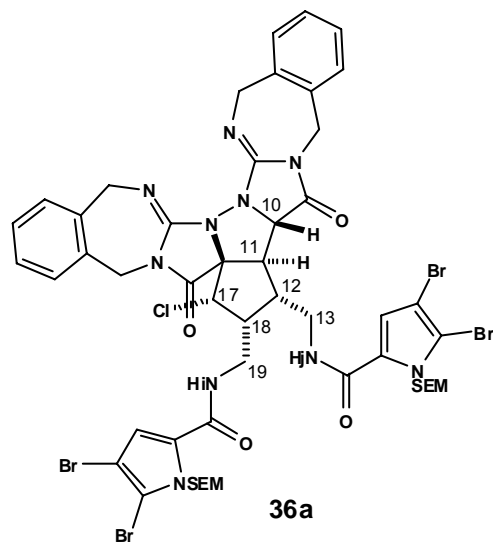

Solvent: CD<sub>3</sub>CN  
 Temp: 25 °C; 800 MHz  
 Pulse sequence: noesy

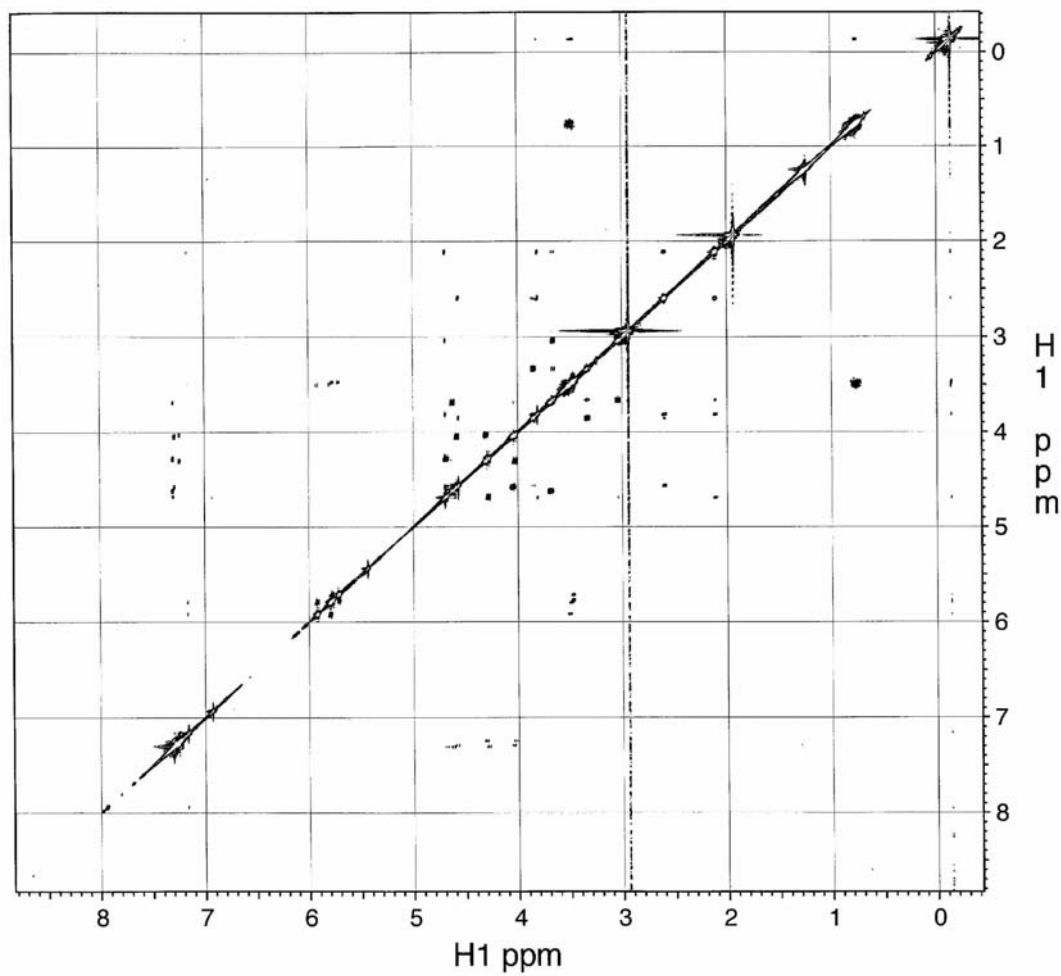

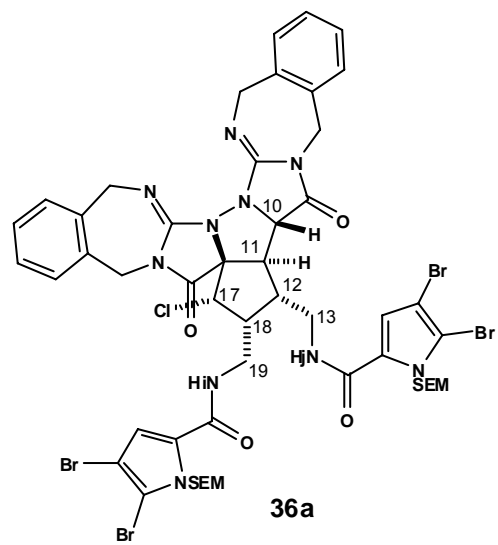

Solvent: CDCl<sub>3</sub>  
Temp: 25 °C; 125MHz

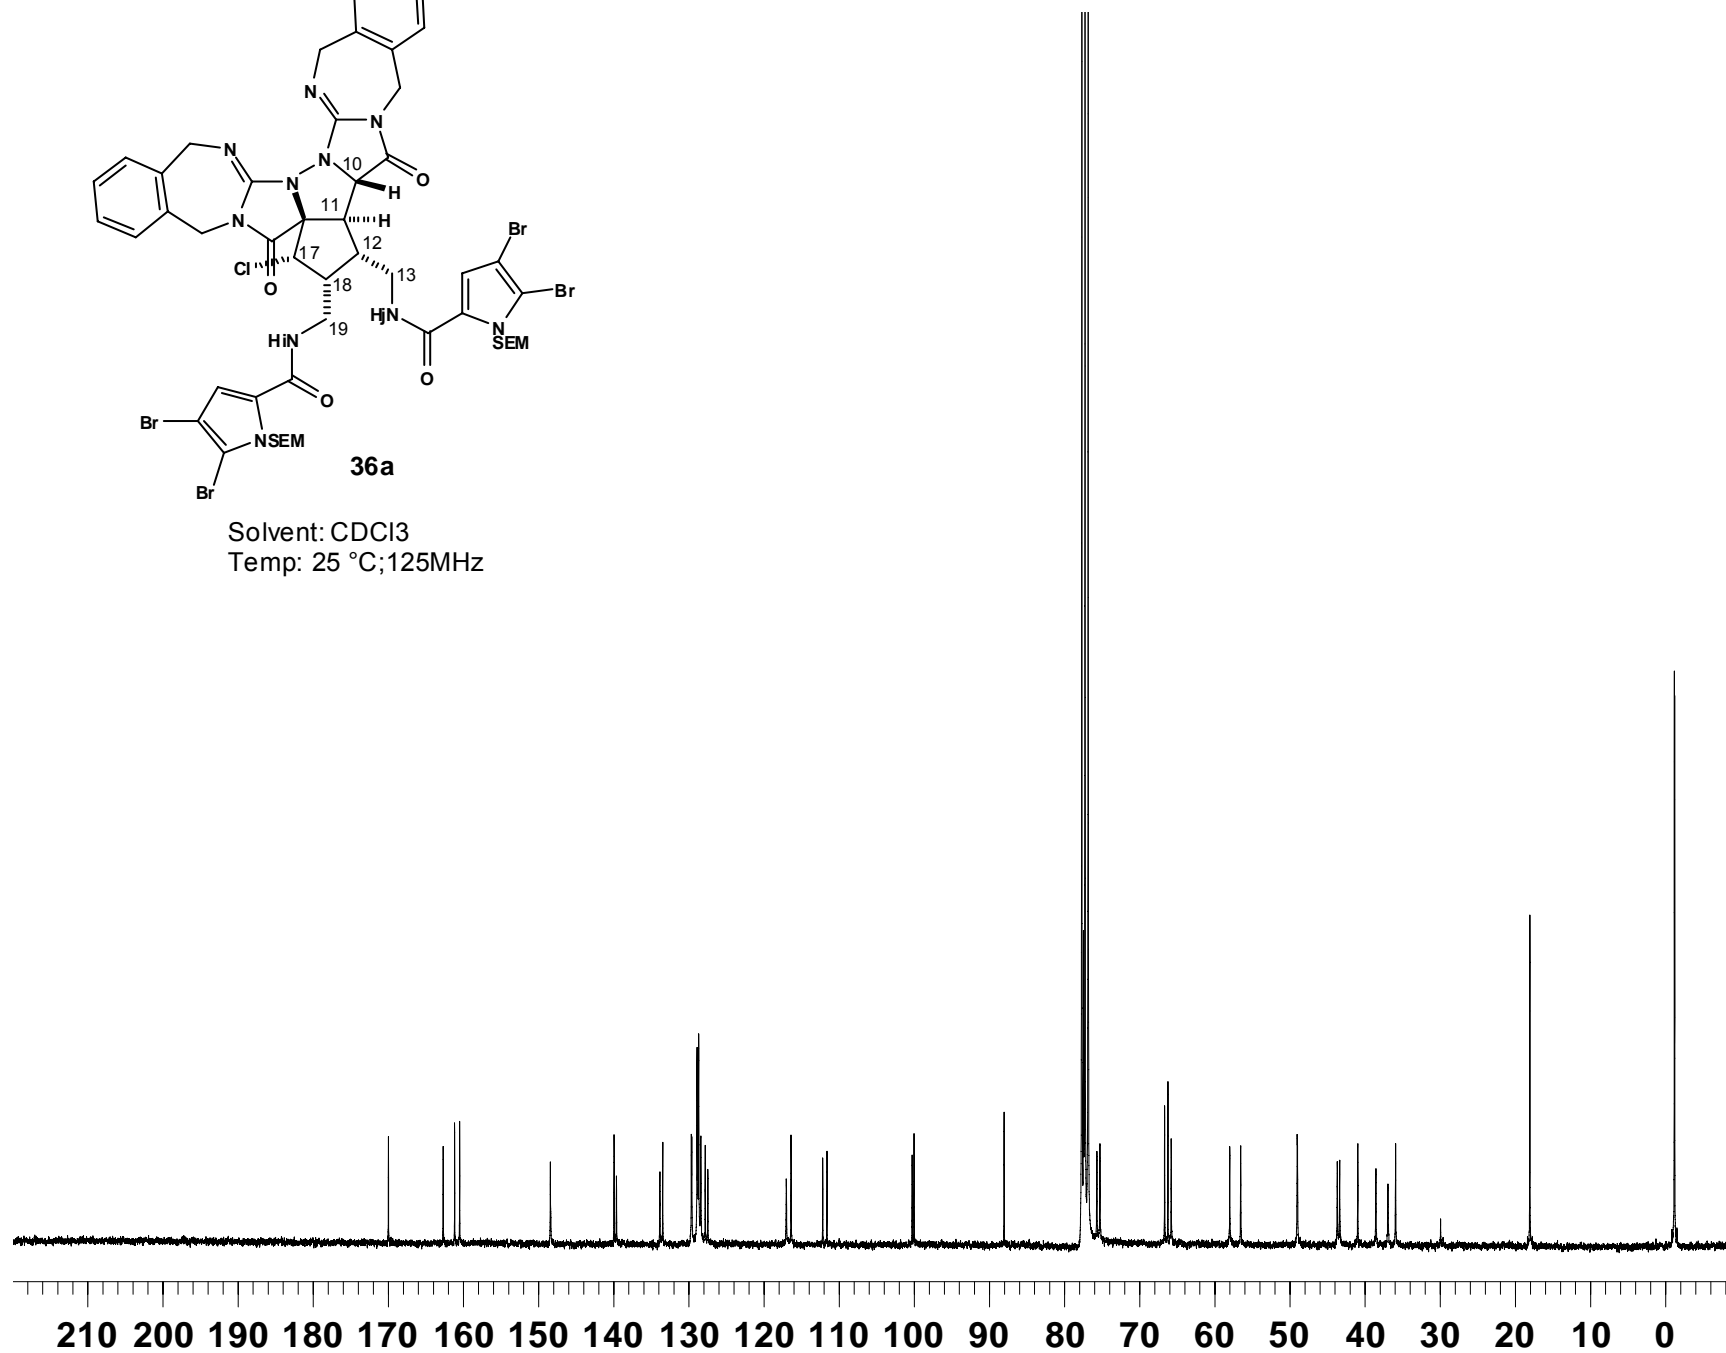

V-131-hmbc

Pulse Sequence: gHMBC

Solvent: CD<sub>3</sub>CN

Temp. 24.2 C / 297.4 K

INOVA-500 "pele500"

Relax. delay 1.000 sec

Acq. time 0.239 sec

Width 4577.7 Hz

2D Width 25000.0 Hz

16 repetitions

150 increments

OBSERVE H1, 499.7265377 MHz

DATA PROCESSING

Sine bell 0.065 sec

F1 DATA PROCESSING

Sine bell 0.007 sec

FT size 2048 x 2048

Total time 53 min, 17 sec

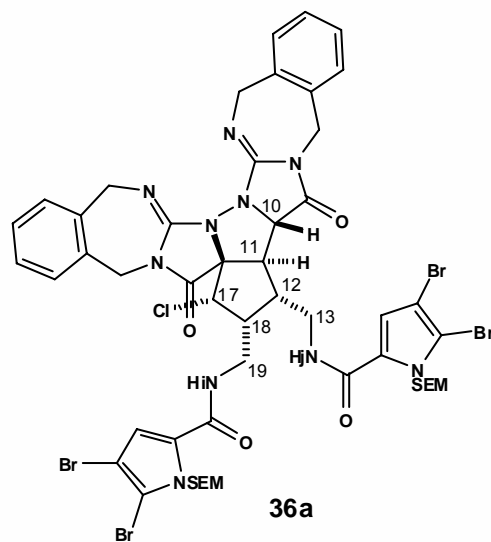

Solvent: CD<sub>3</sub>CN

Temp: 25 °C; 800 MHz

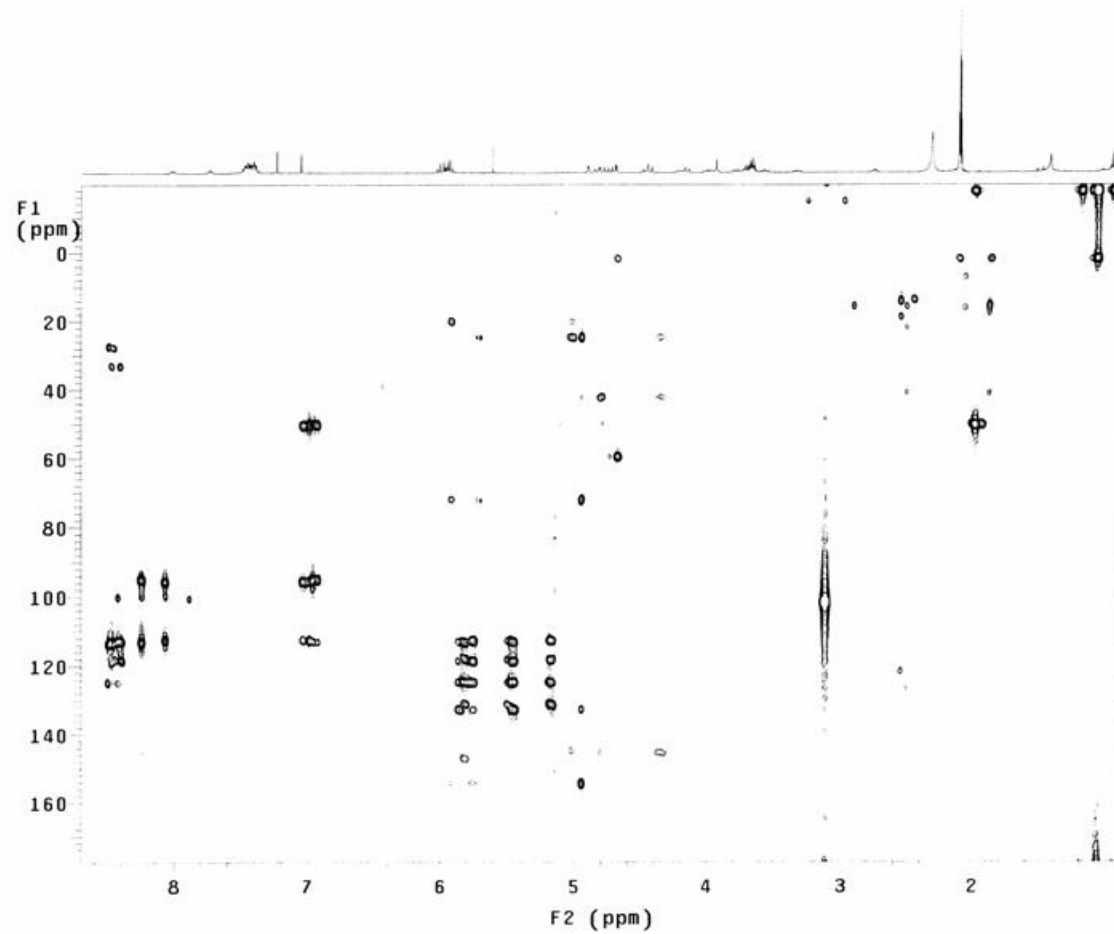

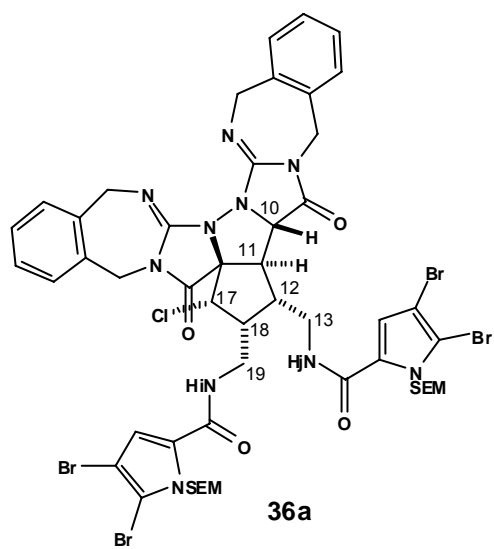

Solvent: CD<sub>3</sub>CN  
 Temp: 25 °C; 800 MHz  
 Pulse sequence: gChsqc

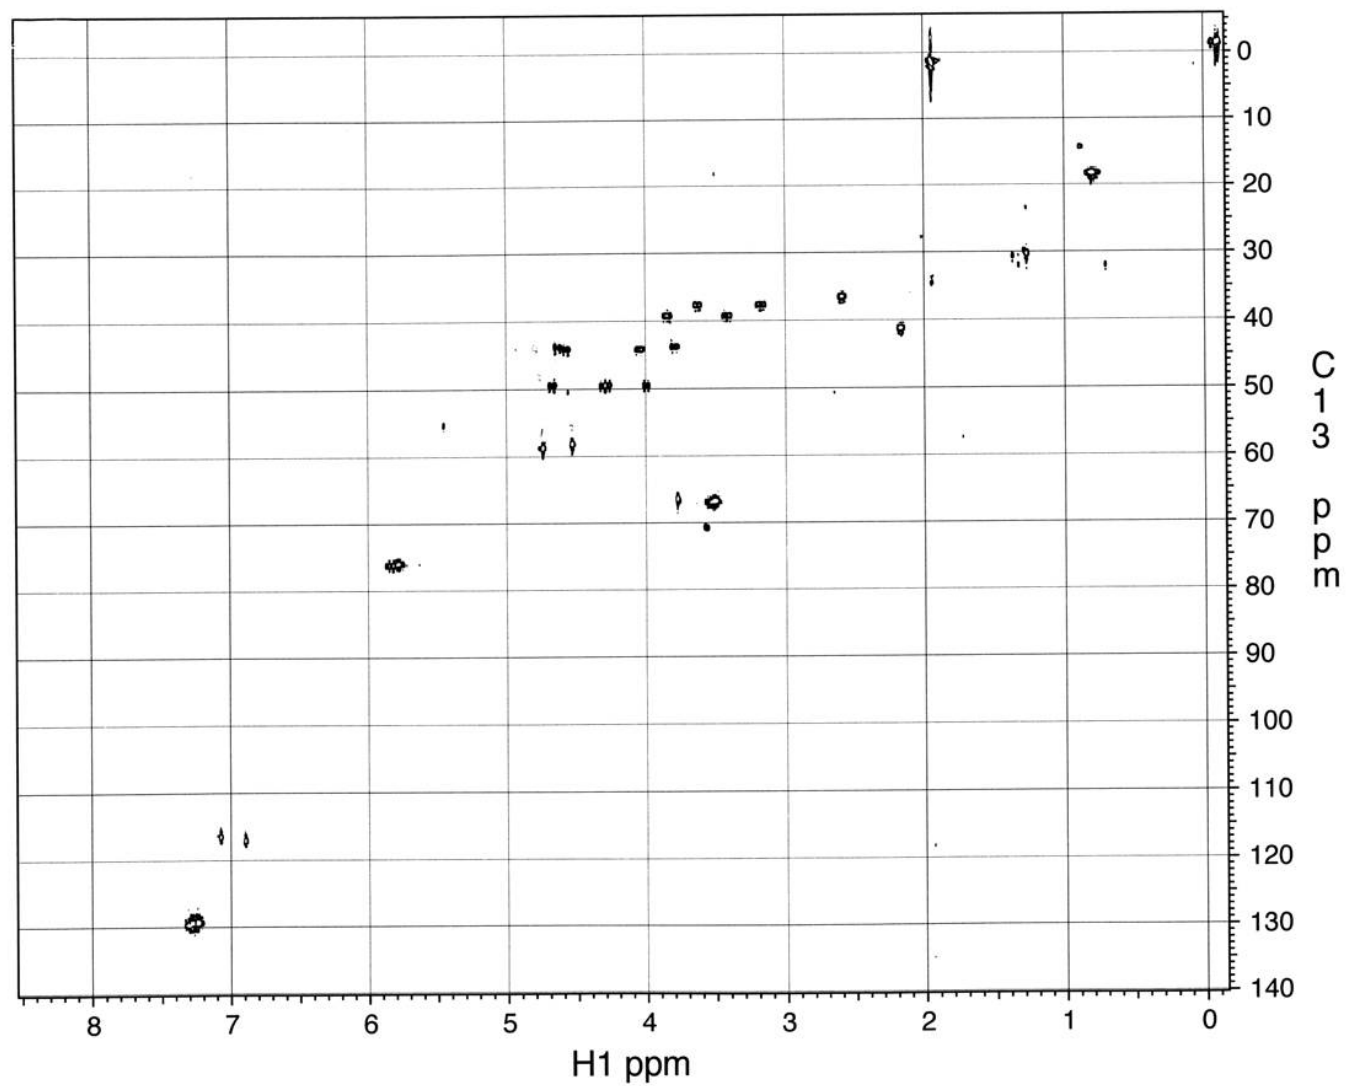

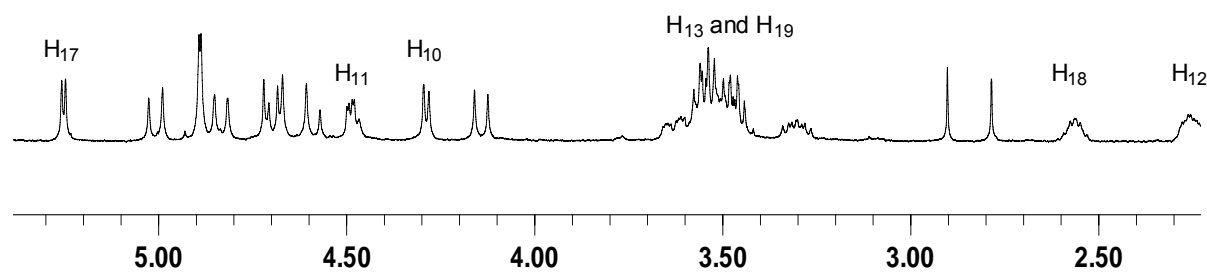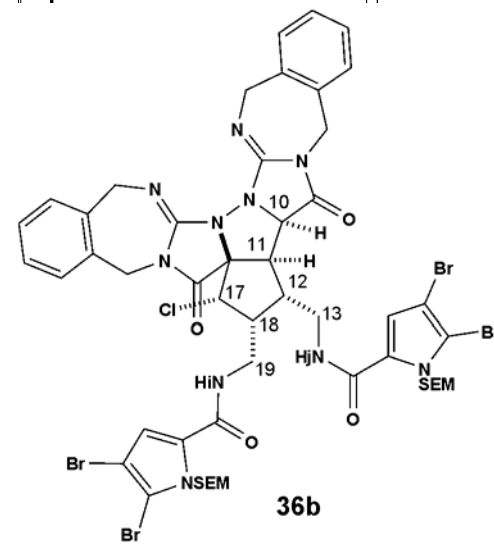

Solvent:  $\text{CD}_3\text{CN}$   
Temp: 25 °C; 400MHz

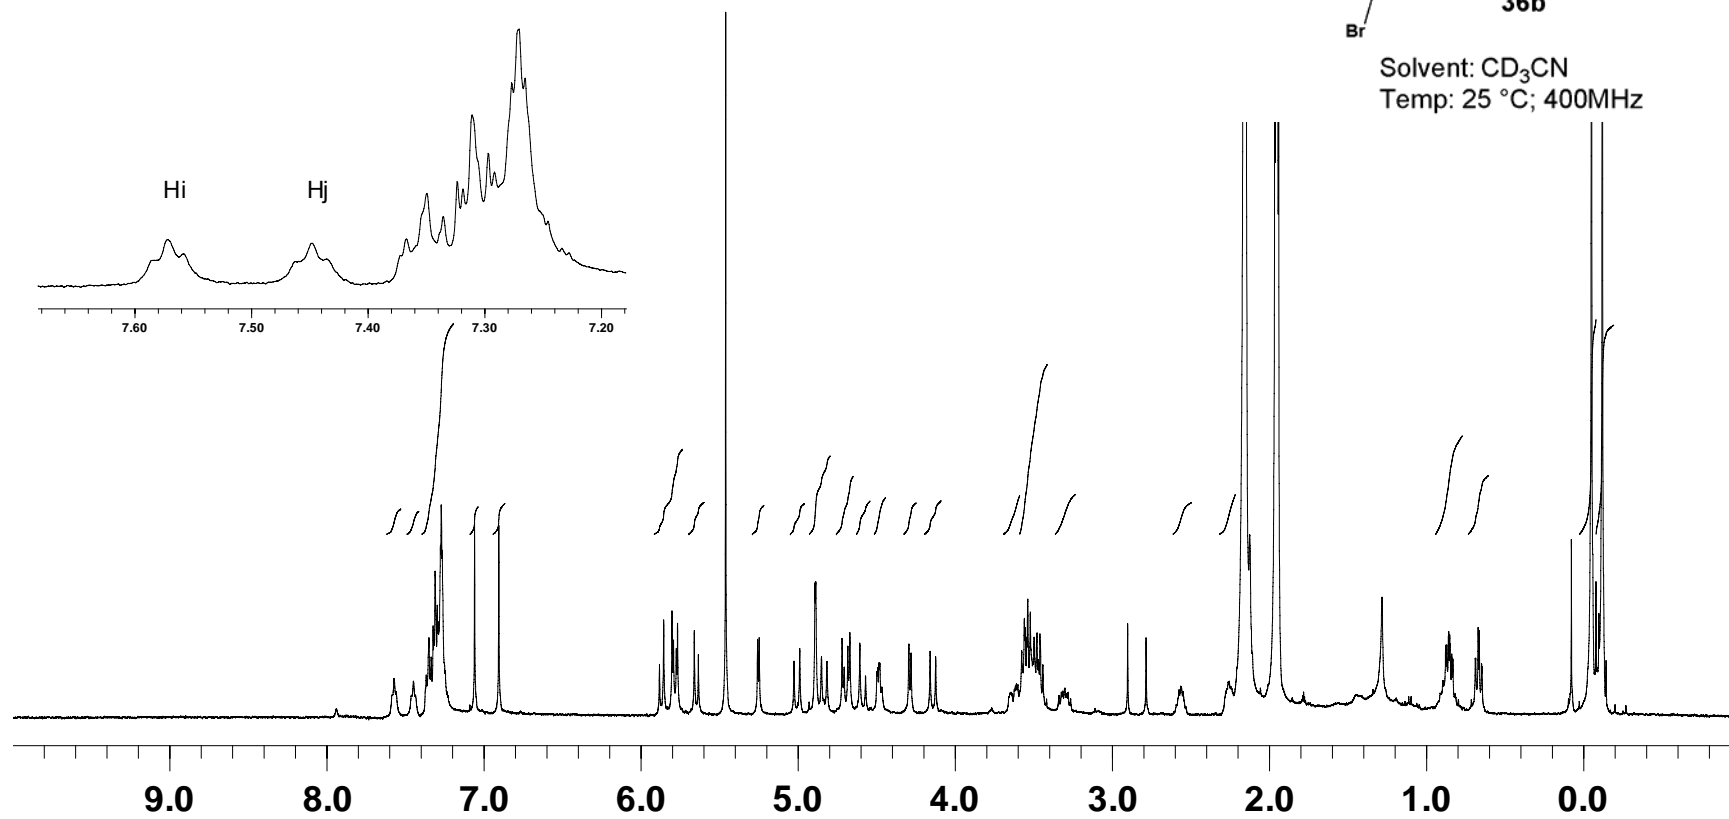

STANDARD 1H OBSERVE

Pulse Sequence: relayh  
Solvent: CD3CN  
Ambient temperature  
File: QL-V-221-A-1-1-cosy  
INOVA-400 "pele400"

Relax. delay 1.000 sec  
COSY 90-45  
Acq. time 0.142 sec  
Width 3595.5 Hz  
2D Width 3595.5 Hz  
56 repetitions  
500 increments  
OBSERVE H1, 399.7814203 MHz  
DATA PROCESSING  
Sine bell 0.071 sec  
F1 DATA PROCESSING  
Sine bell 0.071 sec  
FT size 1024 x 1024  
Total time 9 hr, 30 min, 22 sec

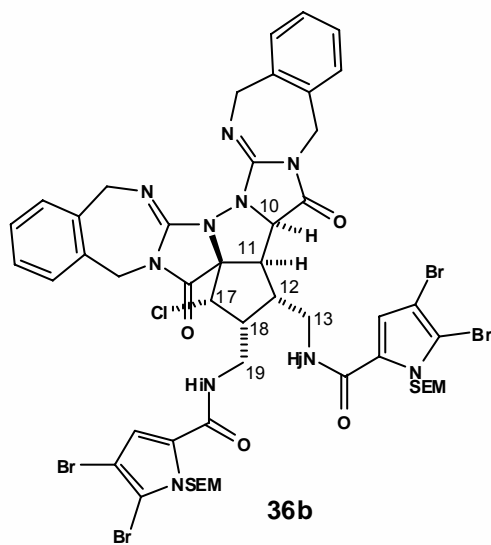

Solvent: CD3CN  
400 MHz

F2  
(ppm)

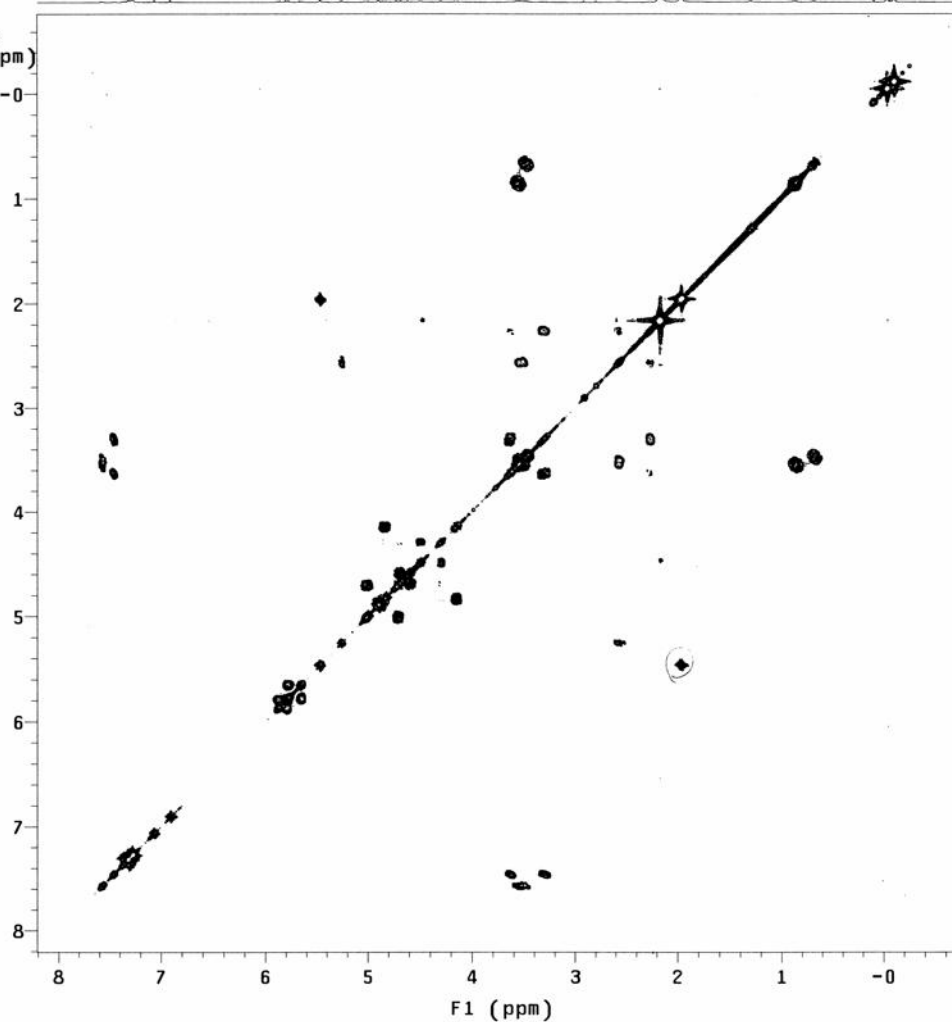

<sup>13</sup>C HSQC

Pulse Sequence: gChsqc

Solvent: cd3cn

Temp. 26.3 C / 299.4 K

INOVA-500 "pele500"

Relax. delay 1.000 sec

Acq. time 0.200 sec

Width 4821.6 Hz

2D Width 25132.0 Hz

32 repetitions

2 x 300 increments

OBSERVE H1, 499.7271231 MHz

DECOUPLE C13, 125.6605328 MHz

Power 47 dB

on during acquisition

off during delay

wurst140 modulated

DATA PROCESSING

Gauss apodization 0.022 sec

F1 DATA PROCESSING

Gauss apodization 0.005 sec

FT size 2048 x 2048

Total time 6 hr, 36 min, 44 sec

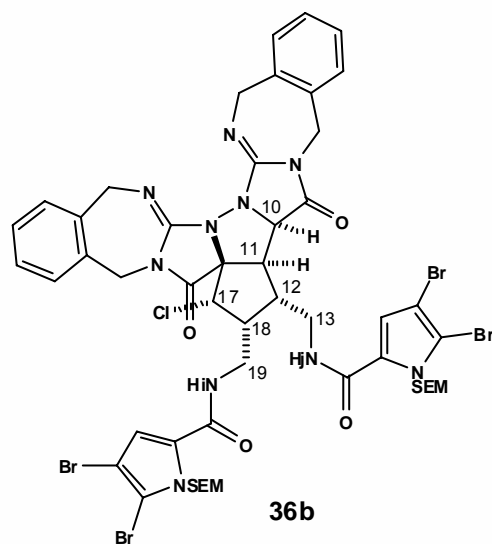

Solvent: CD<sub>3</sub>CN

500 MHz

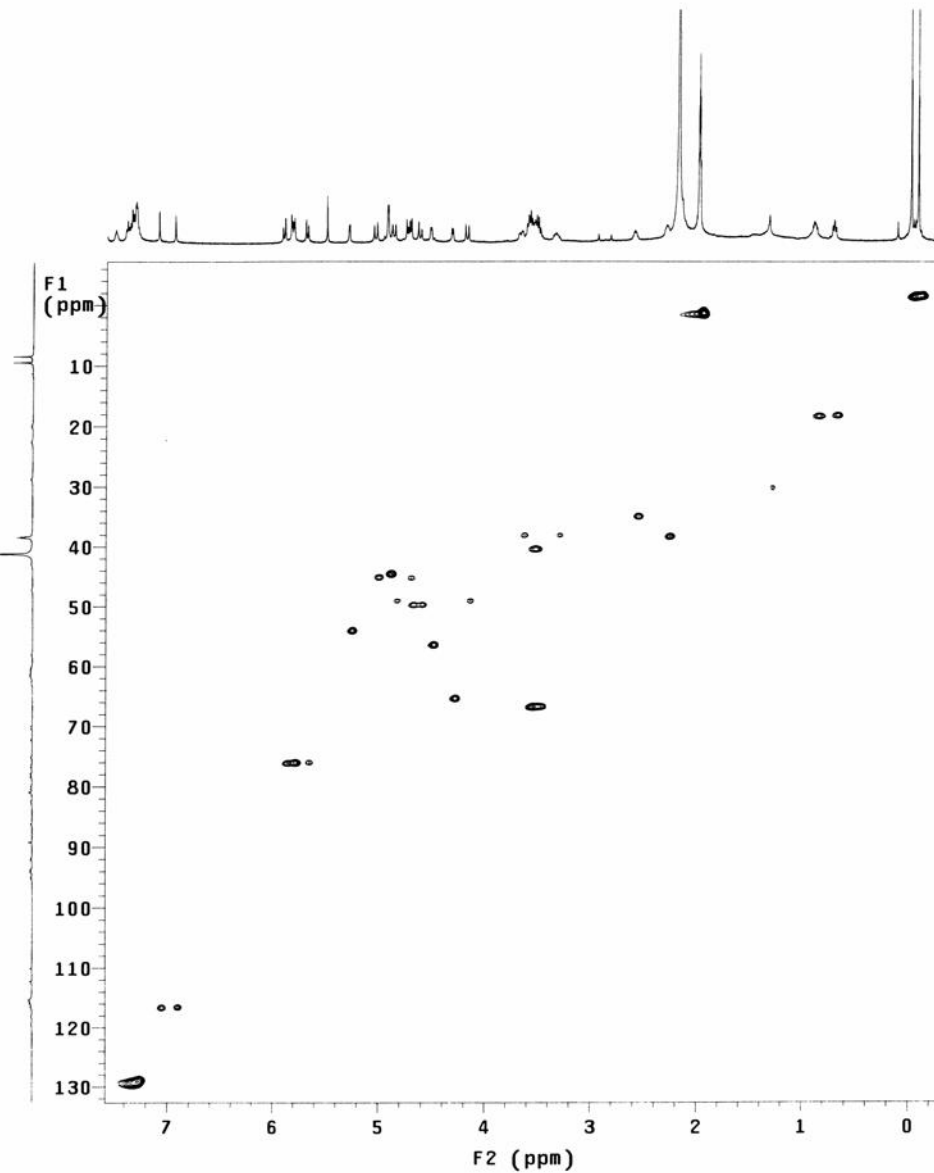

STANDARD PROTON PARAMETERS

Pulse Sequence: gHMBC  
Solvent: cd3cn  
Temp. 26.3 C / 299.4 K  
INOVA-500 "pele500"

Relax. delay 1.000 sec  
Acq. time 0.237 sec  
Width 4821.6 Hz  
2D Width 25133.5 Hz  
128 repetitions  
300 increments  
OBSERVE H1, 499.7271262 MHz  
DATA PROCESSING  
Sine bell 0.106 sec  
F1 DATA PROCESSING  
Sine bell 0.004 sec  
FT size 2048 x 2048  
Total time 14 hr, 8 min, 41 sec

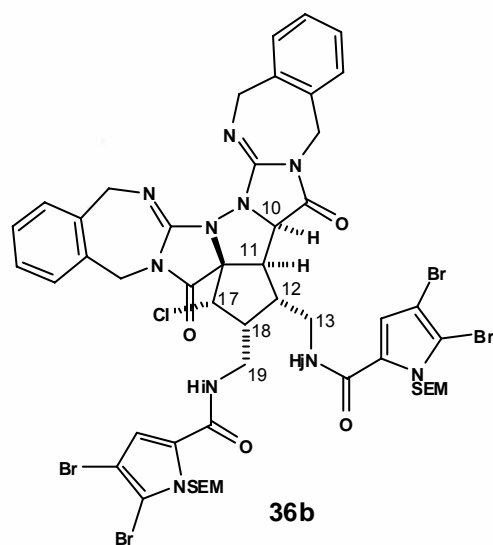

Solvent: CD<sub>3</sub>CN  
500 MHz

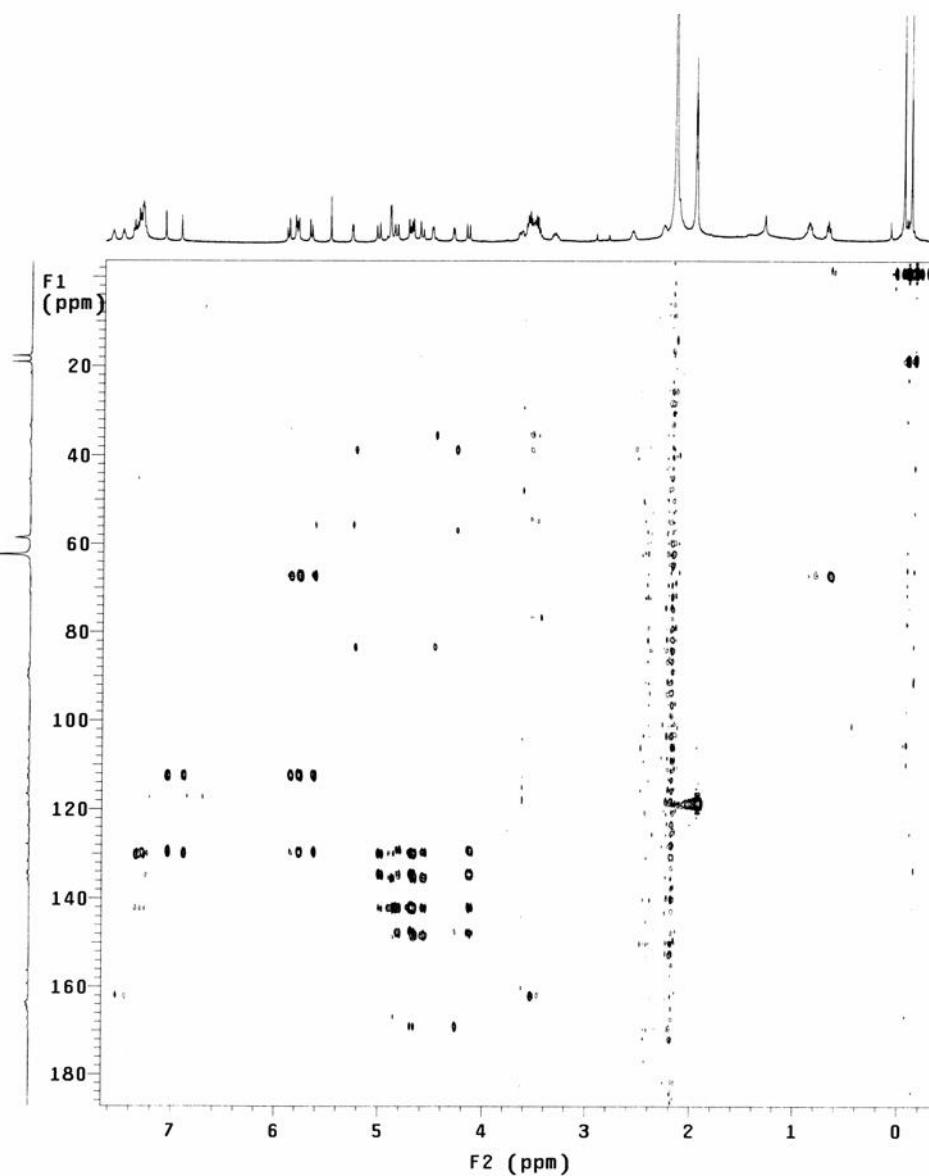



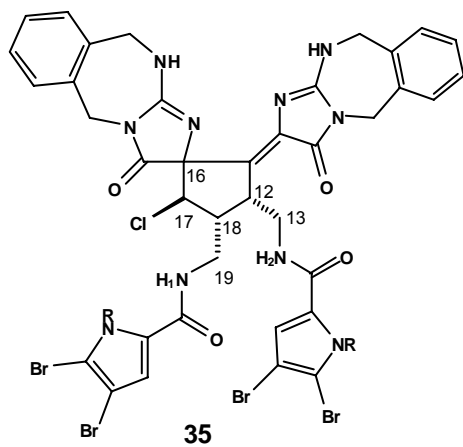

Solvent: CD<sub>3</sub>CN  
Temp: 55 °C; 400 MHz

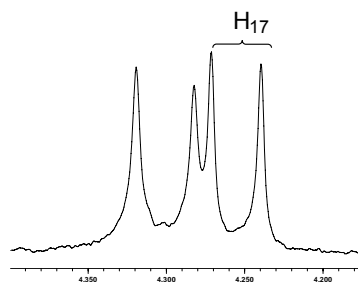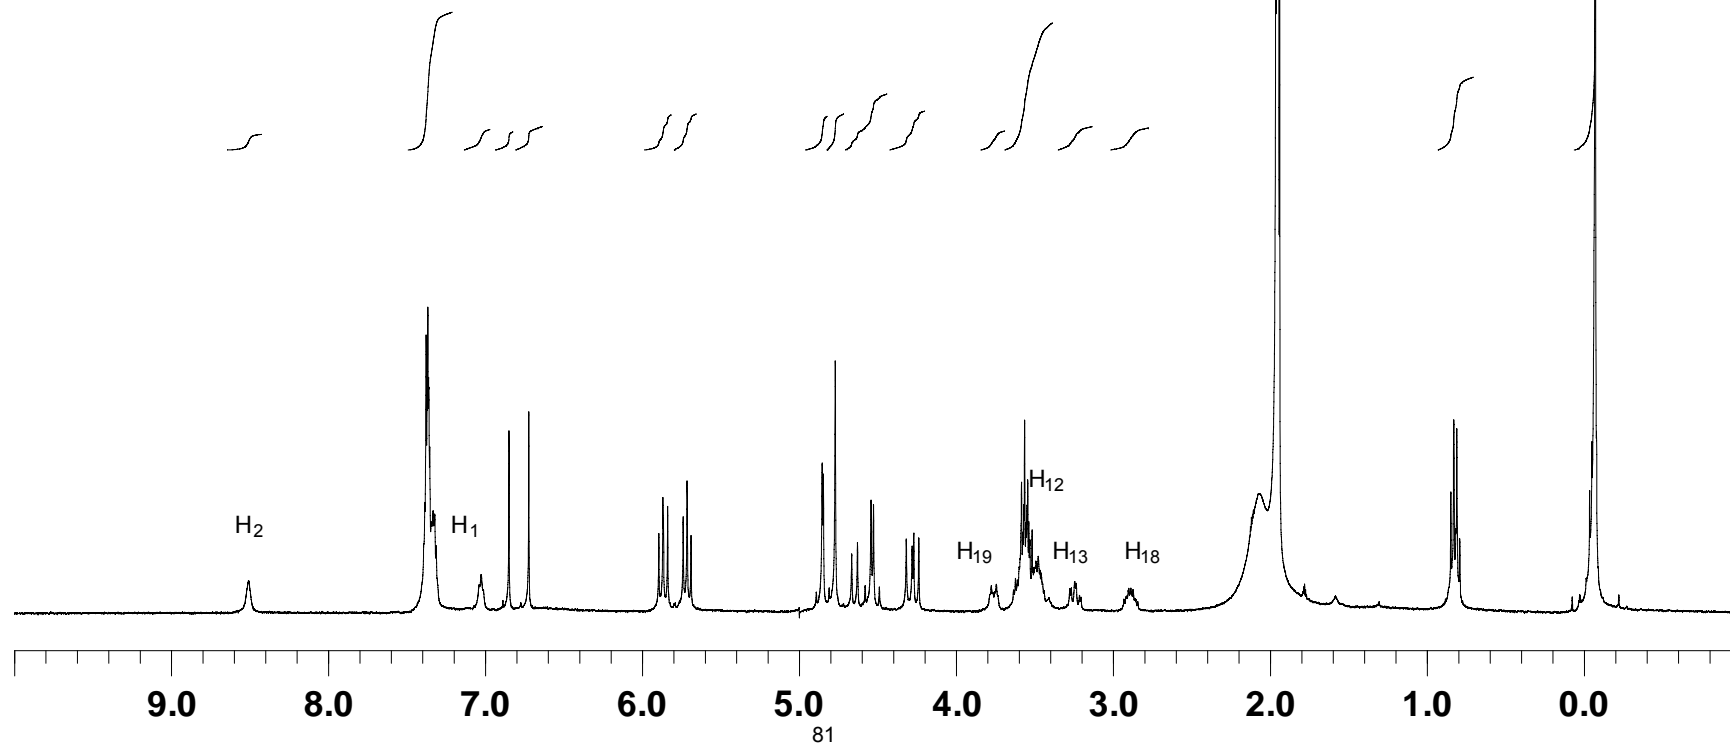

STANDARD 1H OBSERVE

Pulse Sequence: relayh  
Solvent: CD3CN  
Temp. 55.0 C / 328.1 K  
INOVA-400 "pele400"

Relax. delay 1.000 sec  
COSY 90-42  
Acq. time 0.136 sec  
Width 3776.8 Hz  
2D Width 3776.8 Hz  
4 repetitions  
500 increments  
OBSERVE H1, 399.7814203 MHz  
DATA PROCESSING  
Sine bell 0.068 sec  
F1 DATA PROCESSING  
Sine bell 0.068 sec  
FT size 1024 x 1024  
Total time 40 min, 26 sec

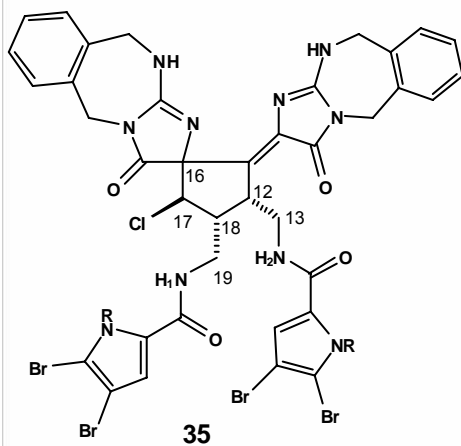

Solvent: CD3CN  
400 MHz

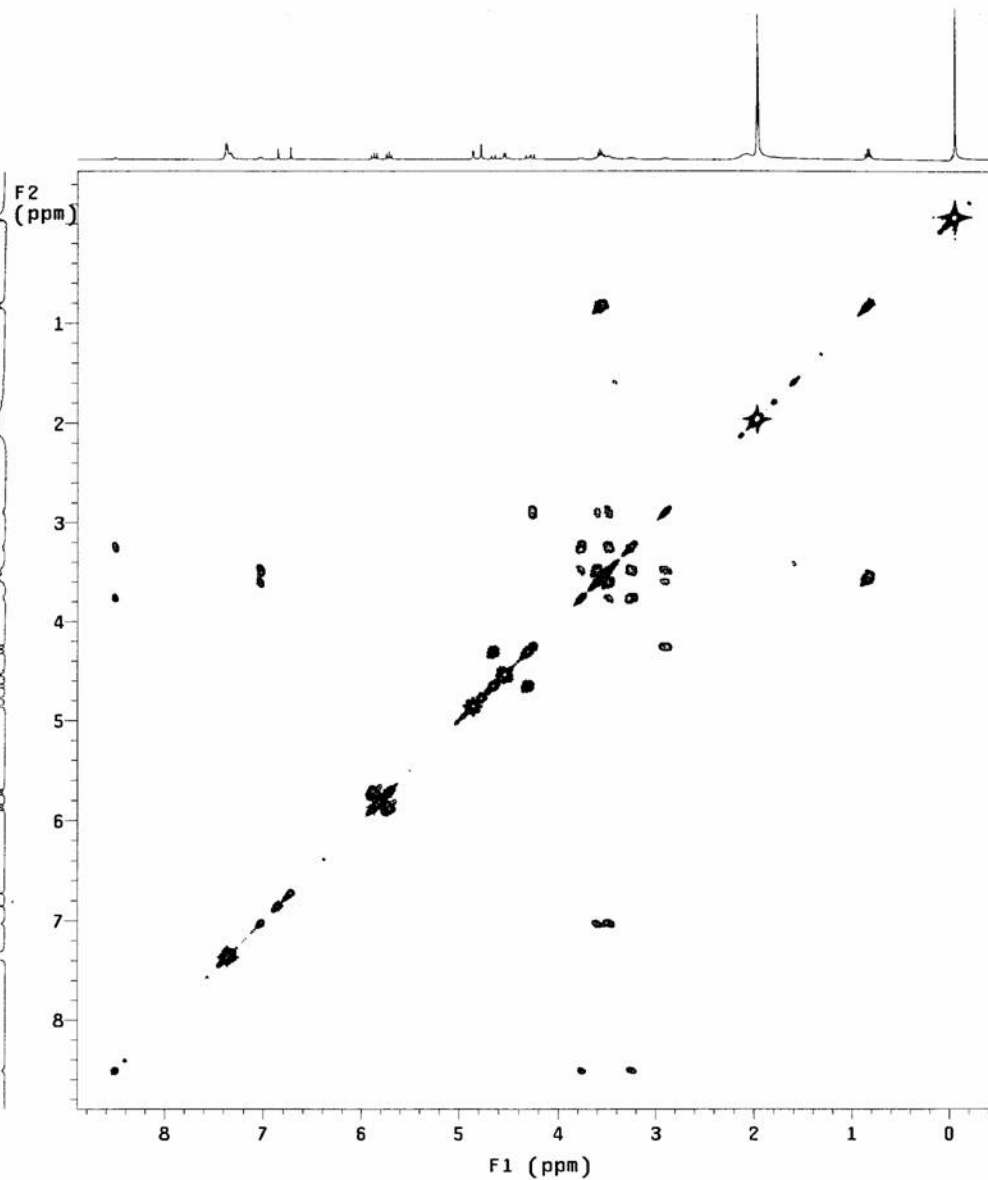

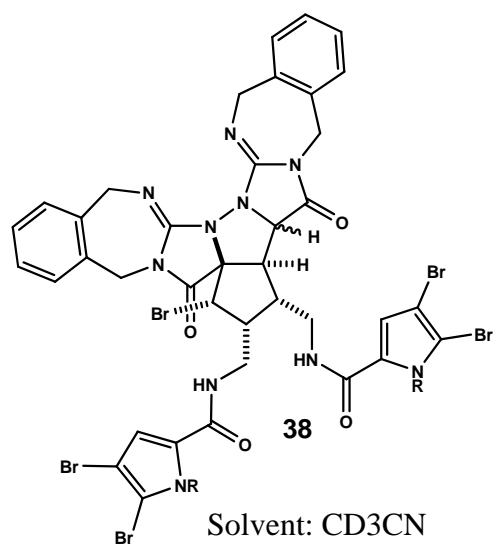

Solvent: CD<sub>3</sub>CN  
500 MHz

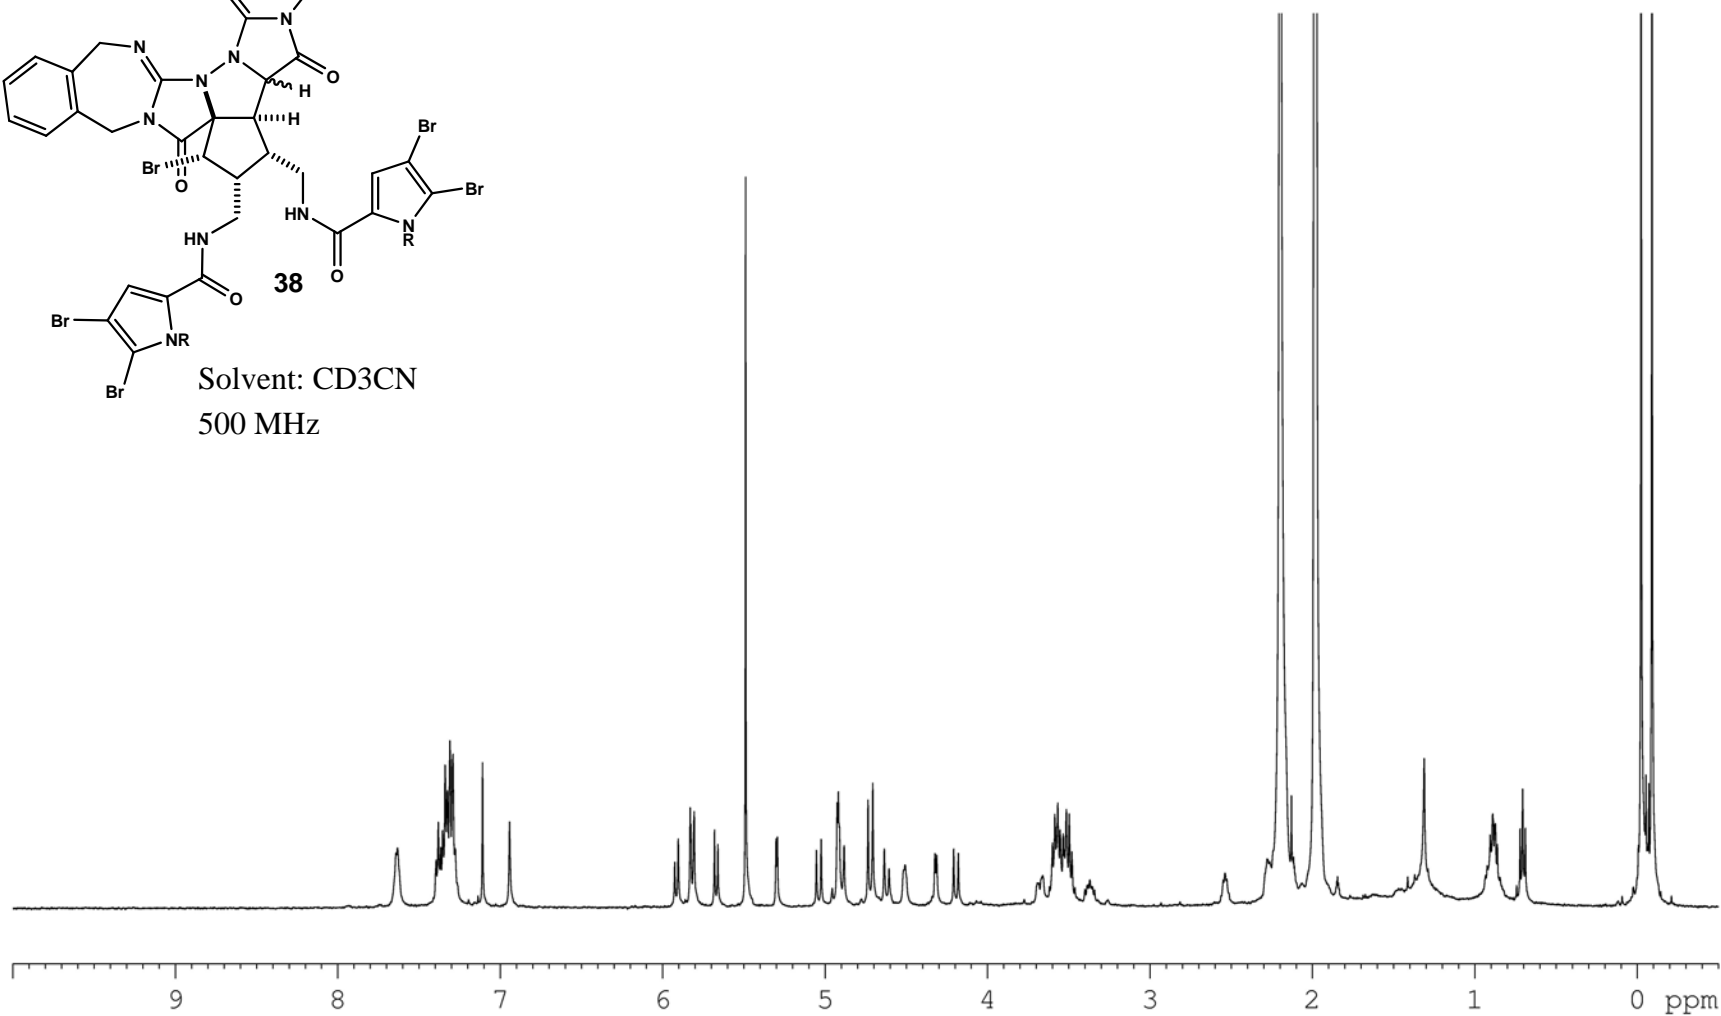

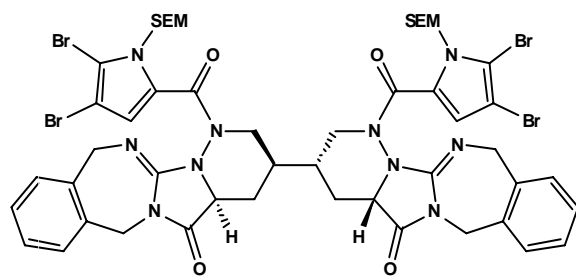

**40a**

Solvent:  $\text{CDCl}_3$   
Temp: room temp; 500 MHz

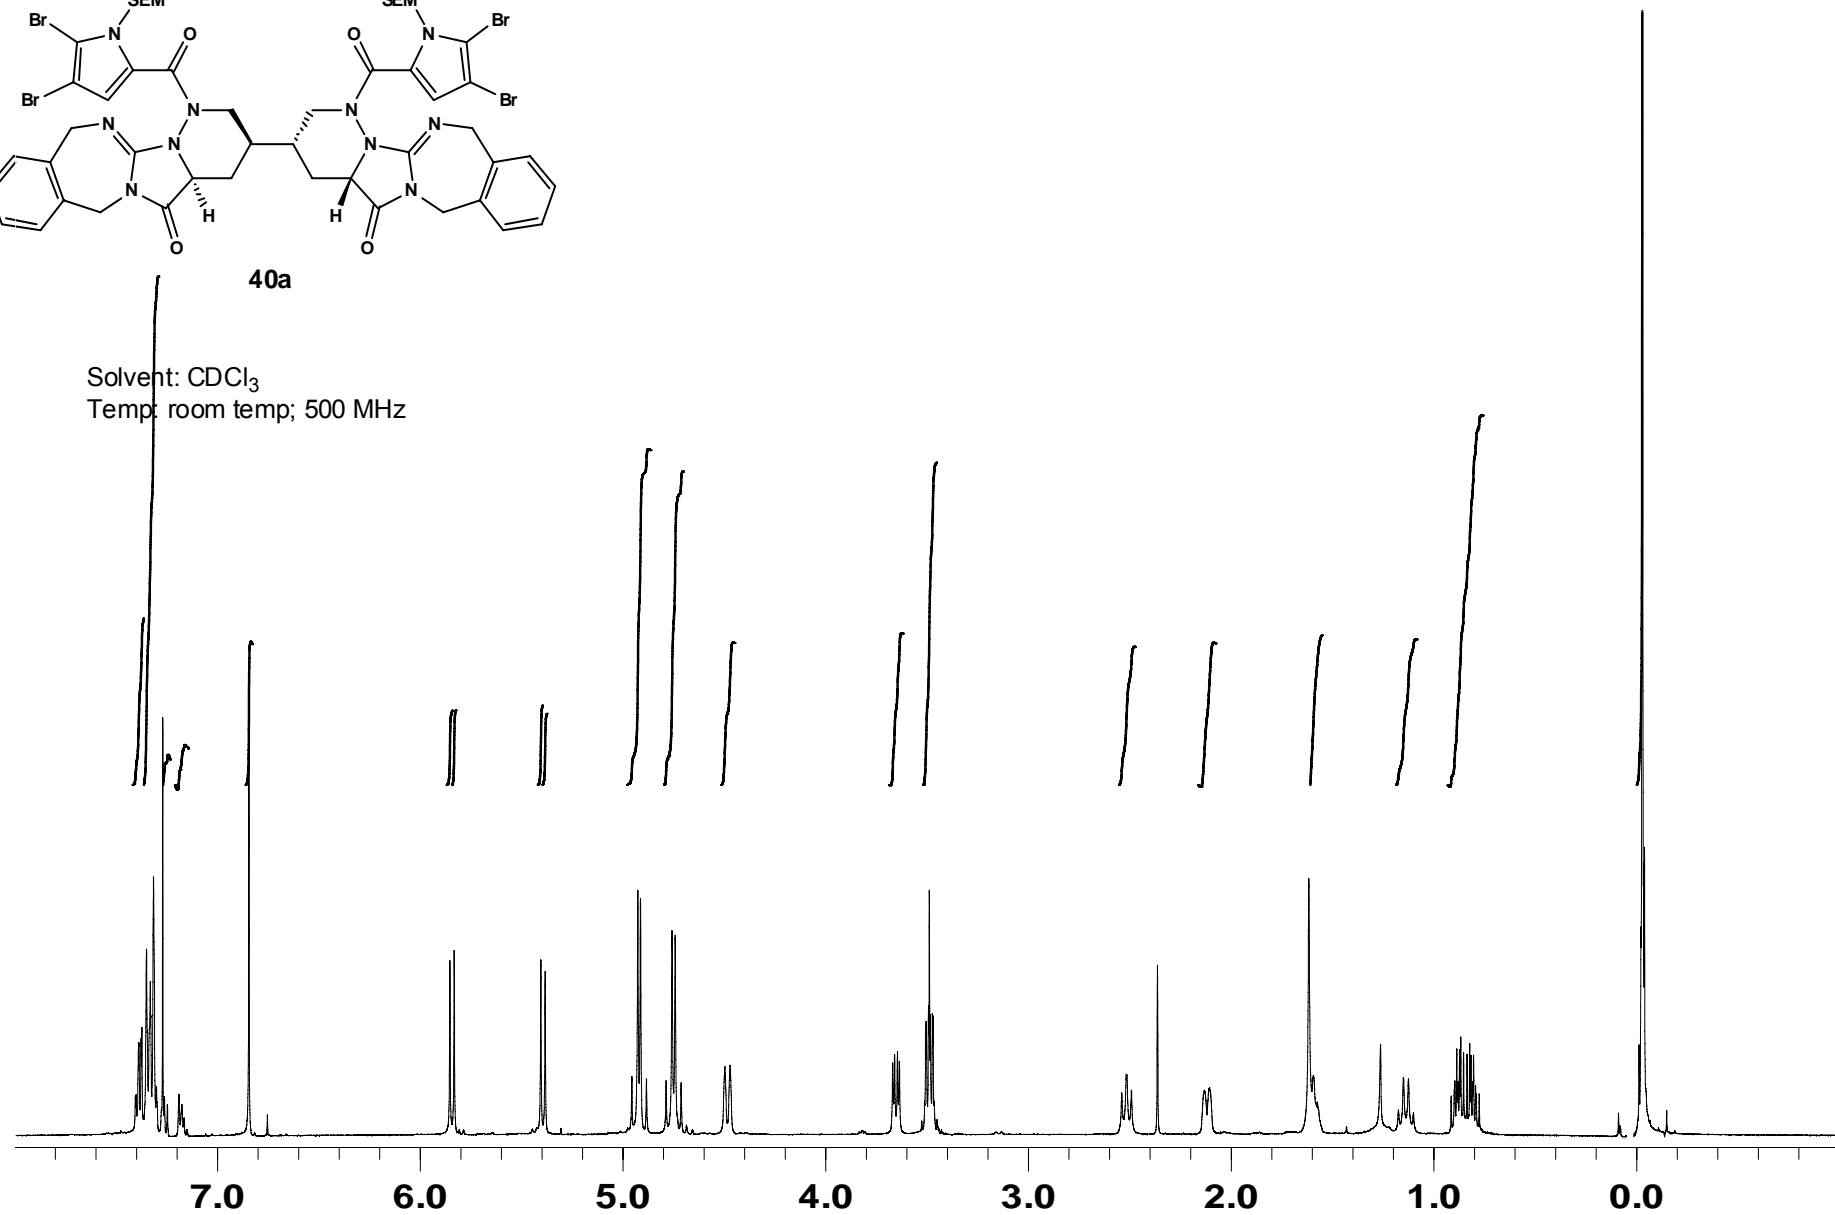

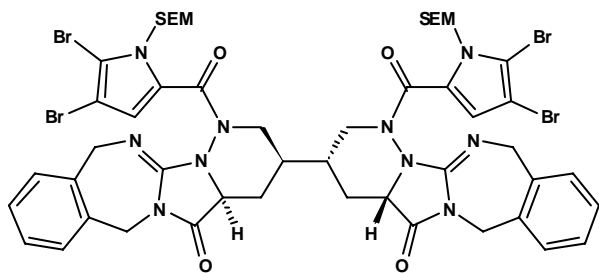

**40a**

Solvent: CDCl<sub>3</sub>

100 MHz

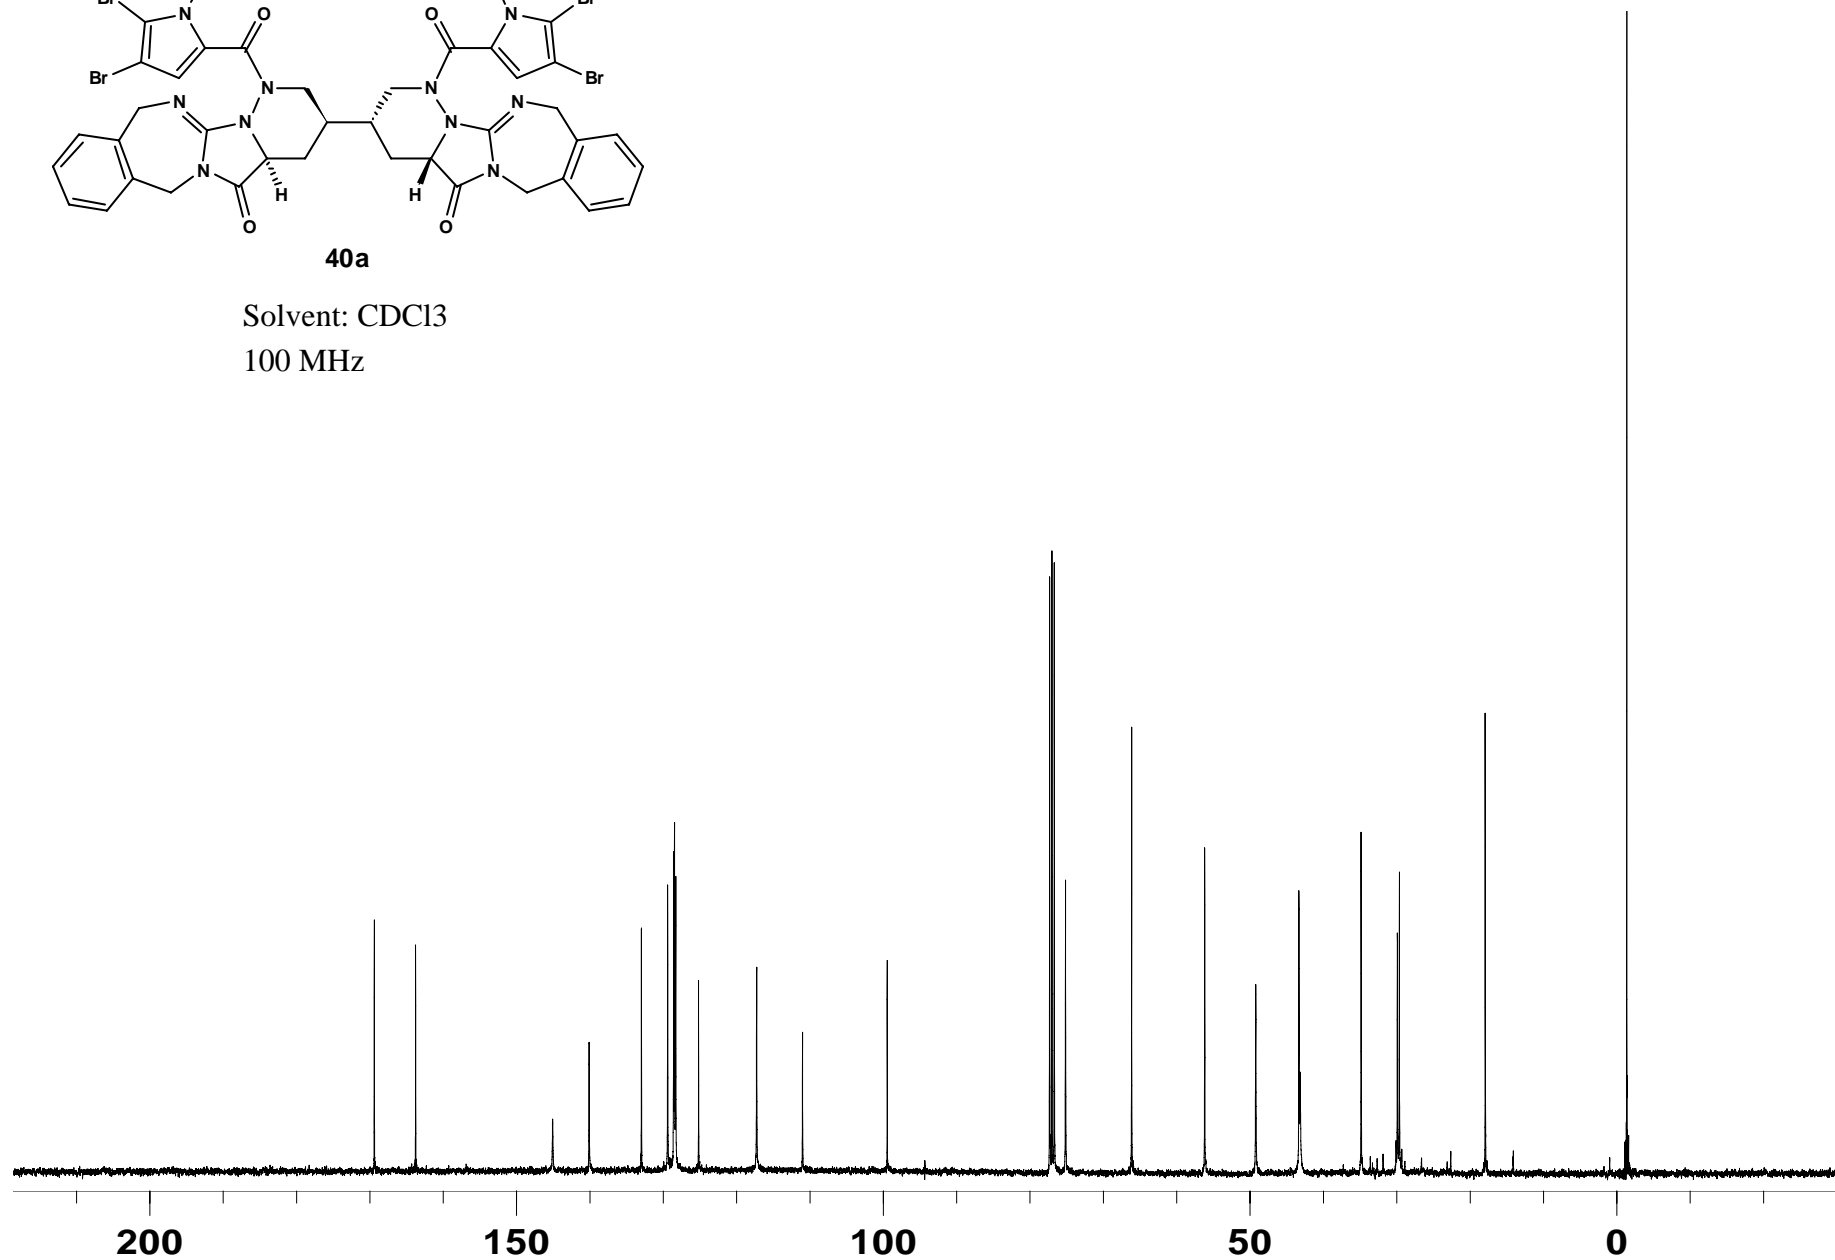

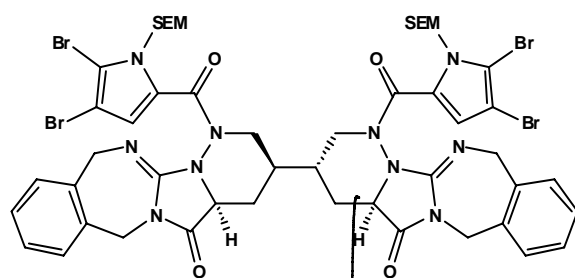

**40b**

Solvent: CD<sub>3</sub>CN  
Temp: 70 °C; 500 MHz

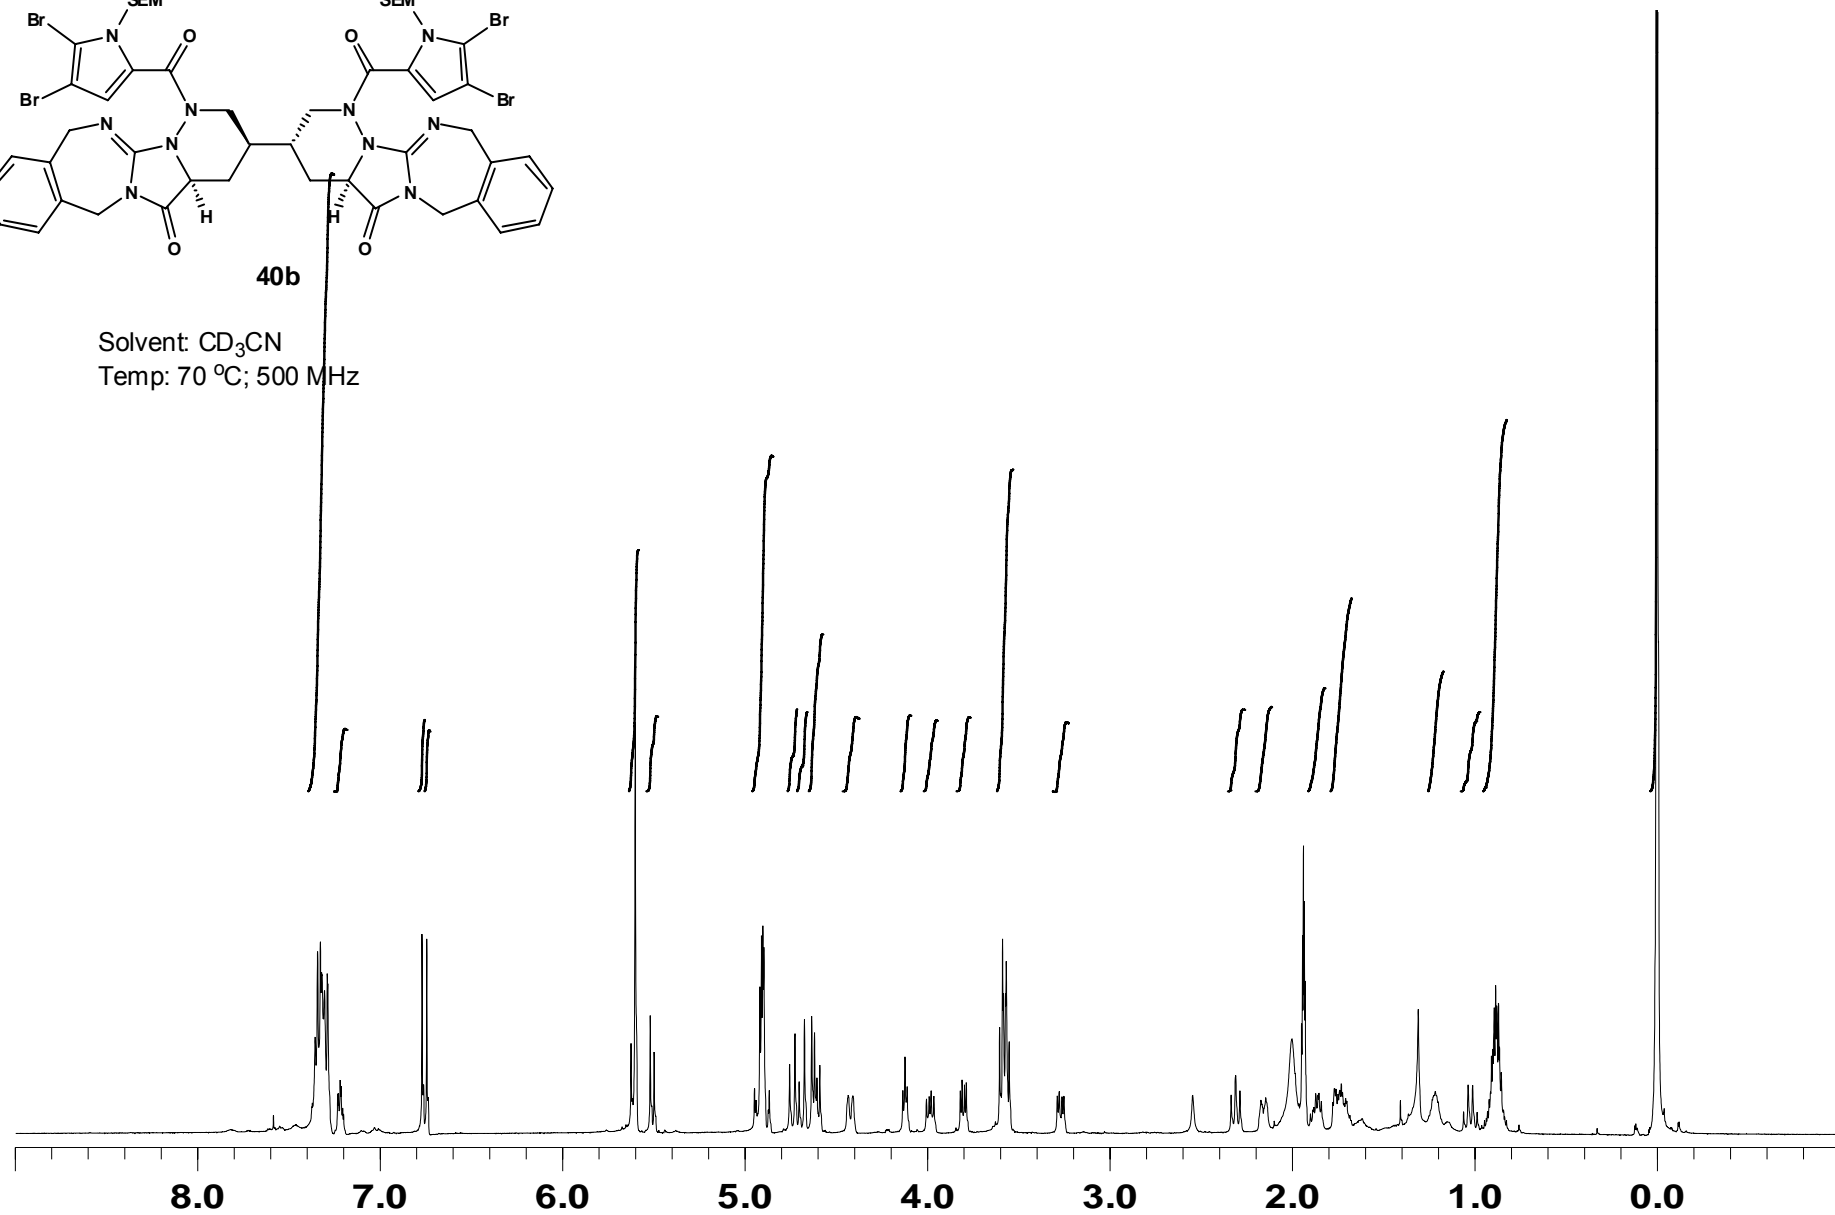

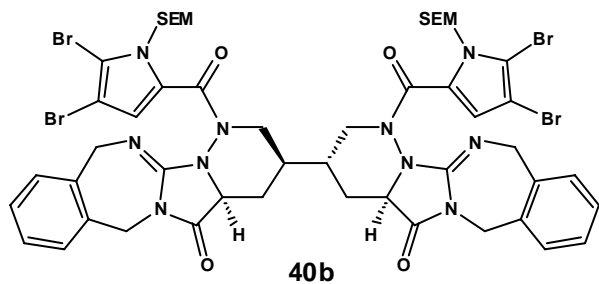

Solvent: CD<sub>3</sub>CN  
400 MHz

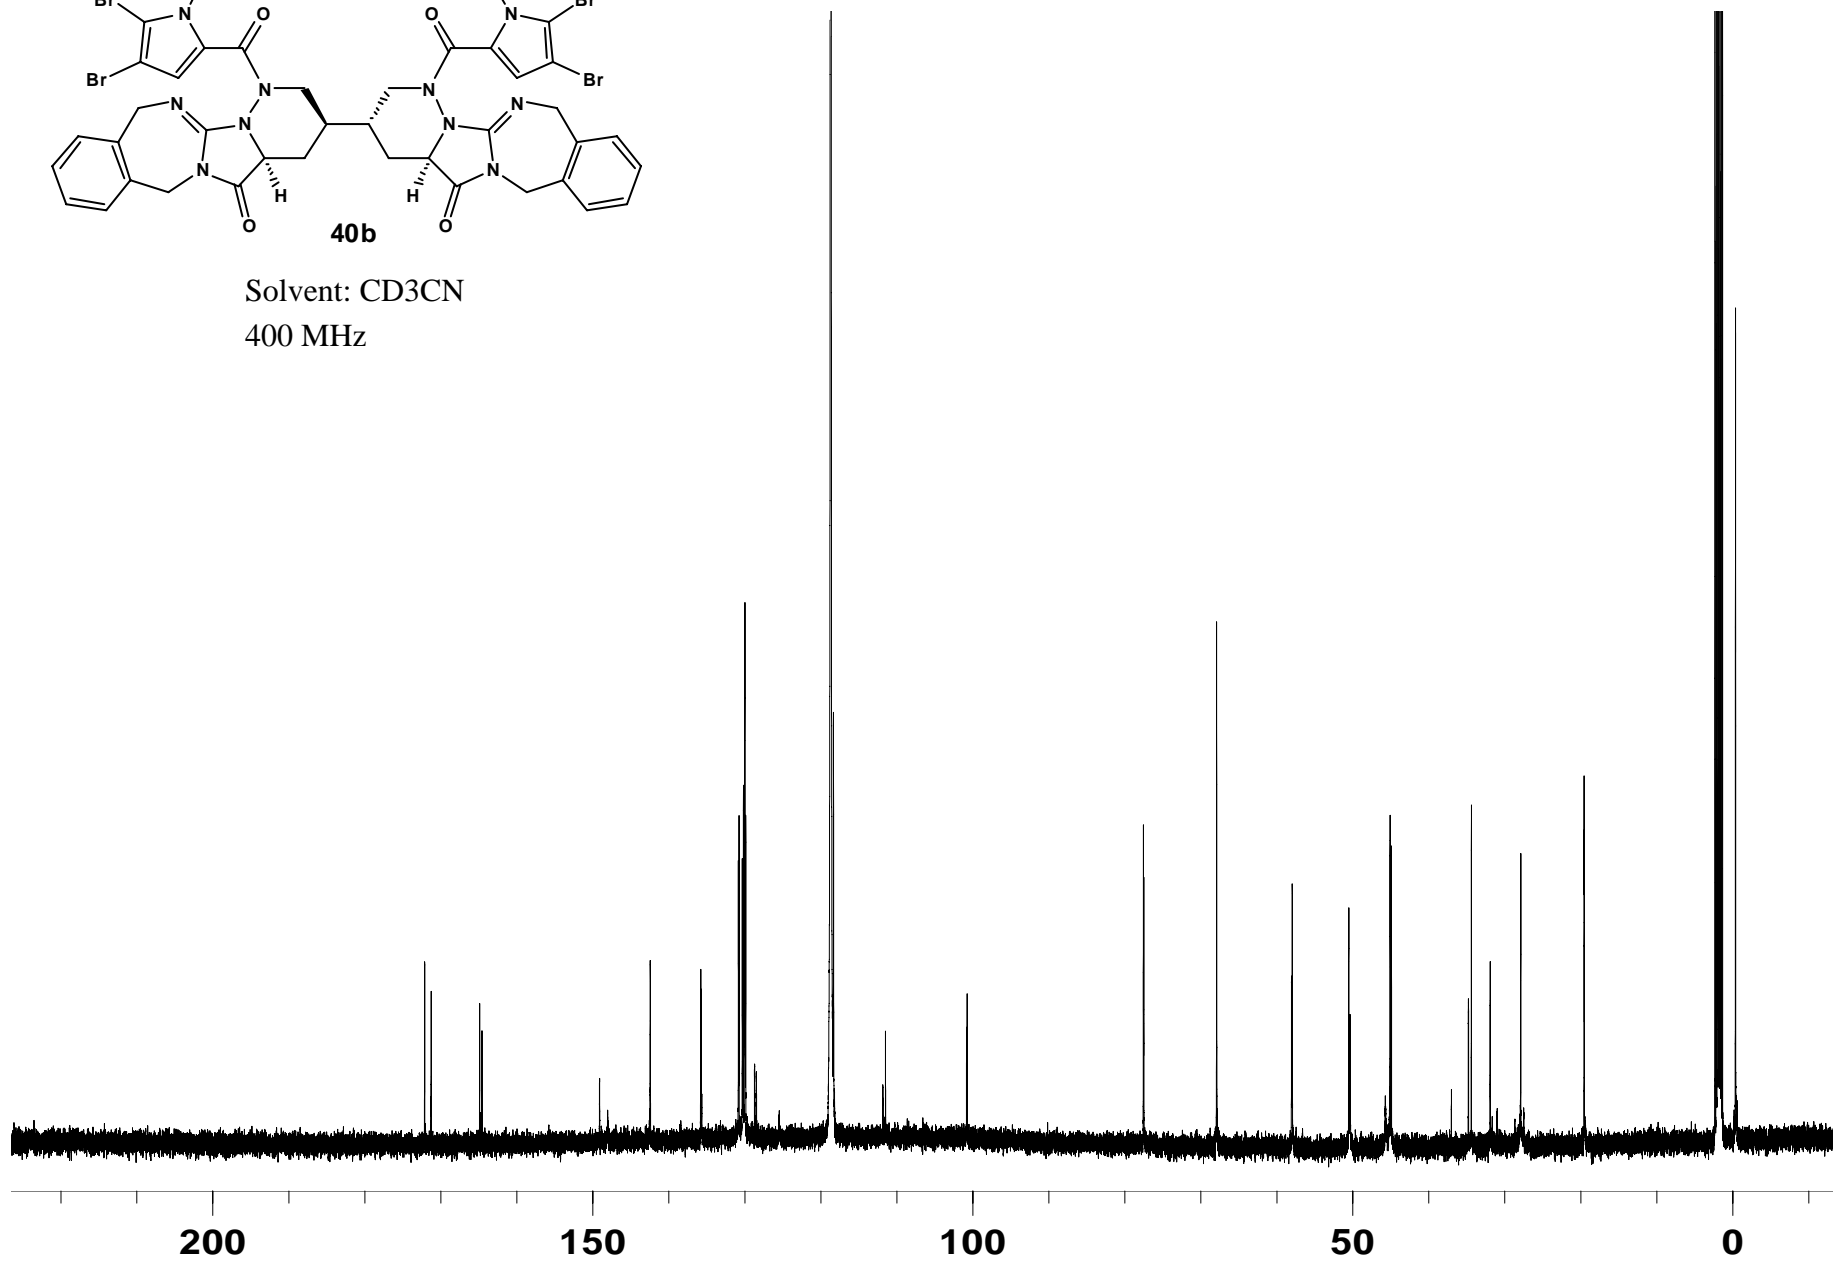

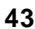

500

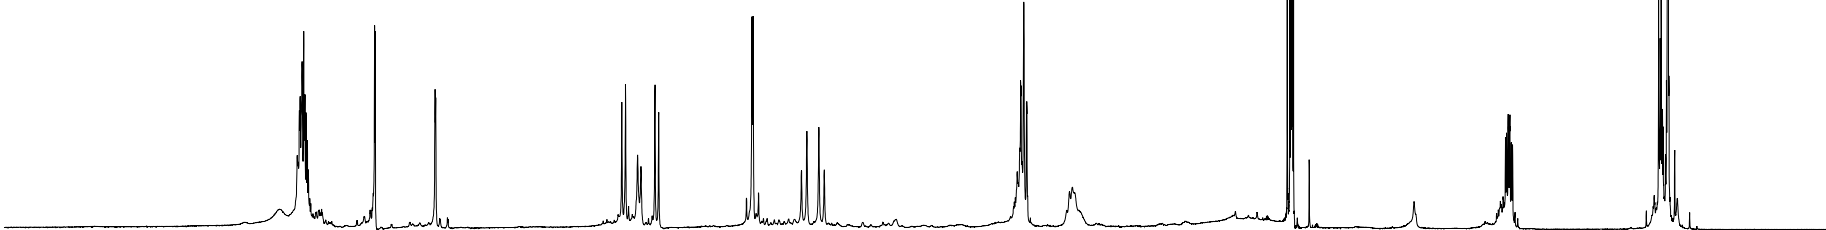



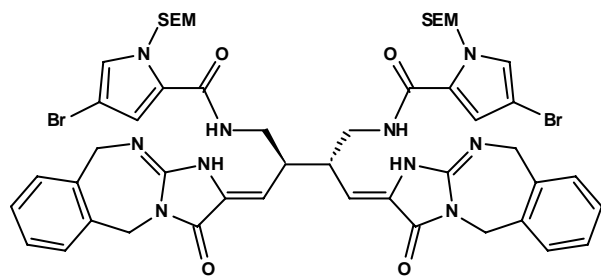

**43**

Solvent: CD<sub>3</sub>CN

100 MHz

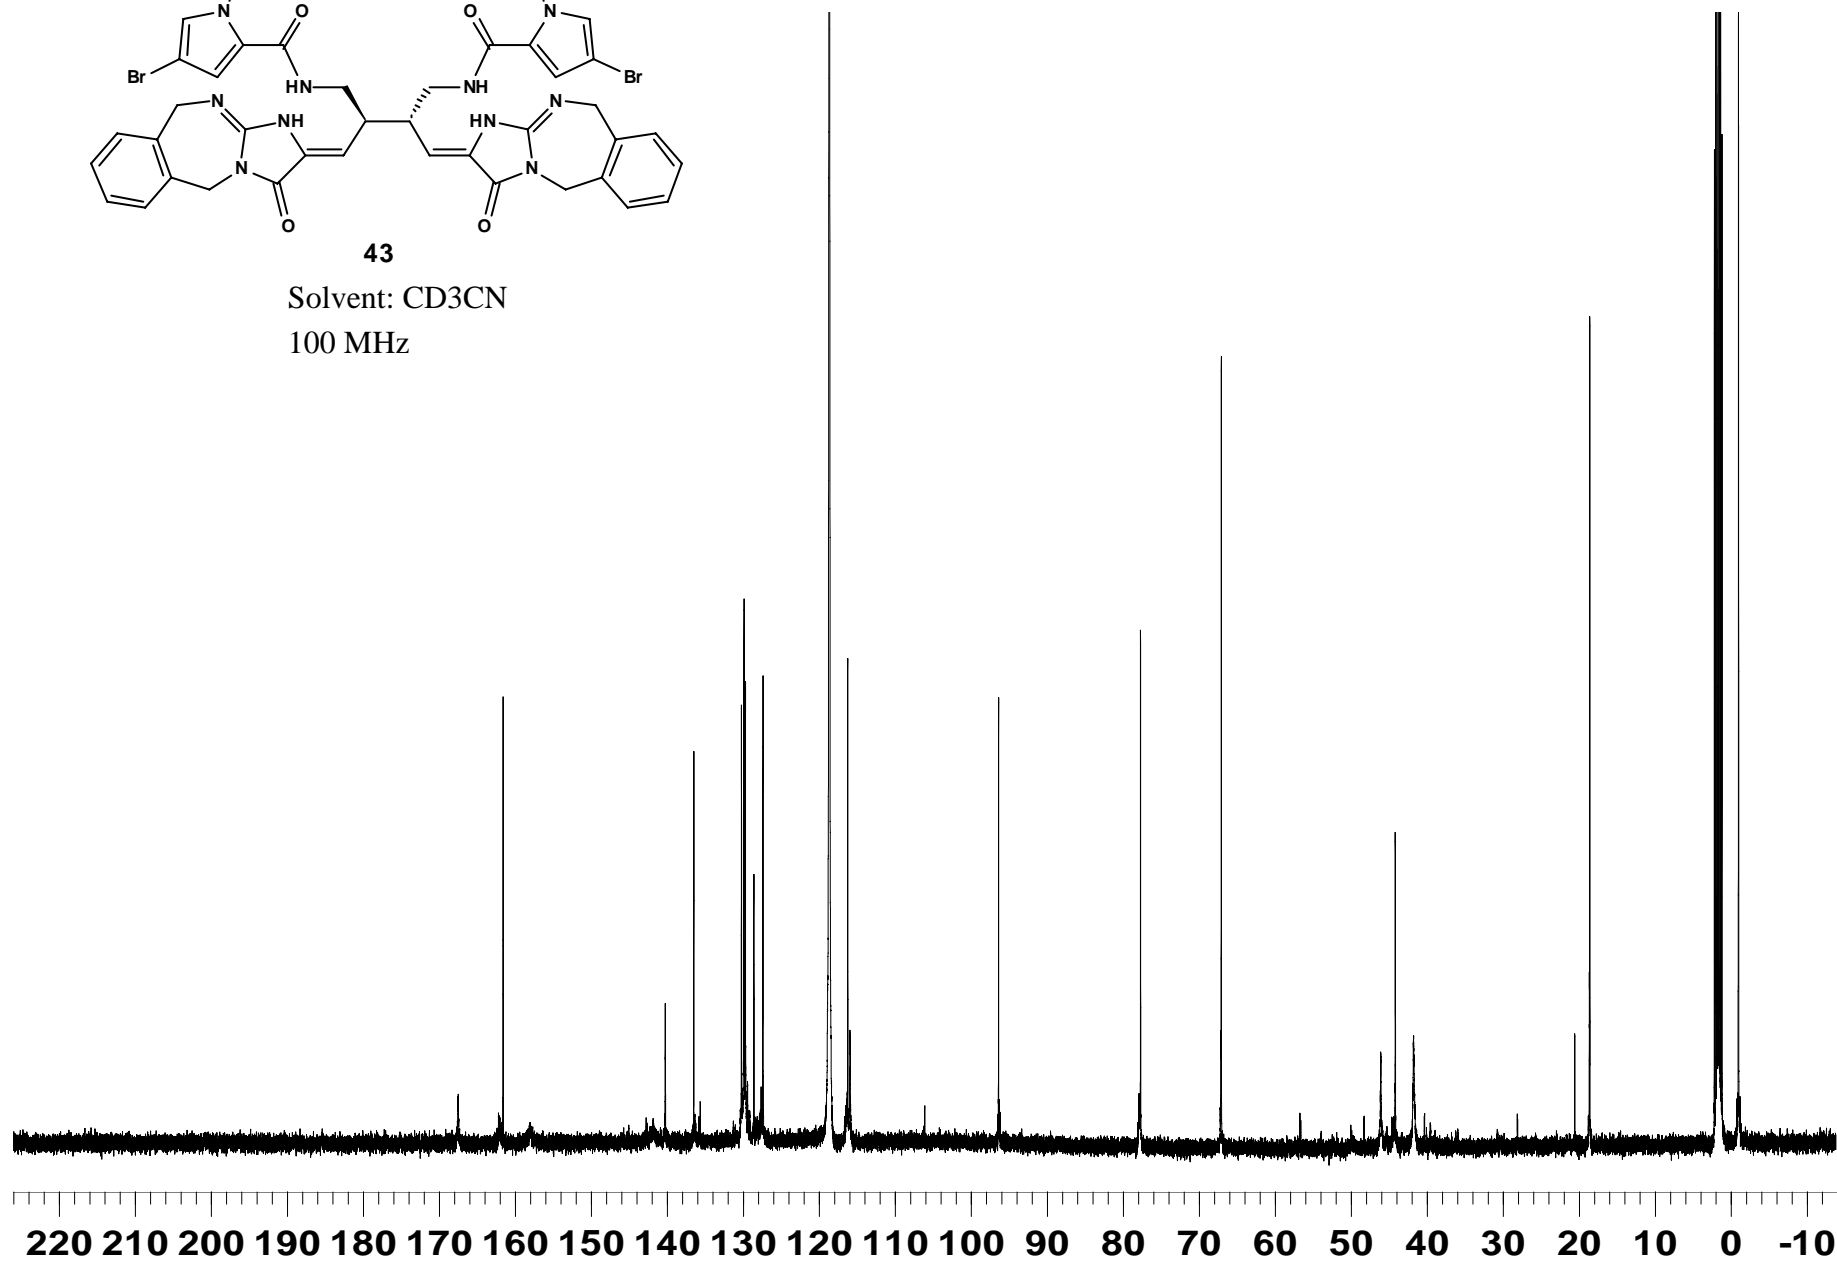

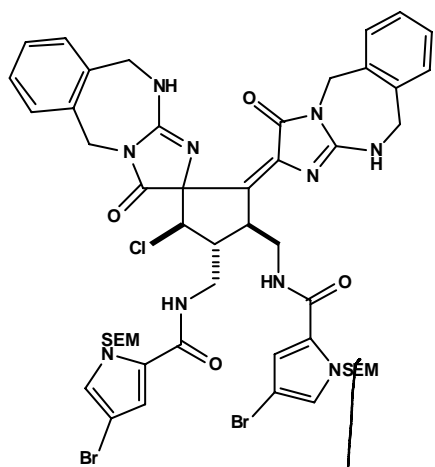

Solvent: CD<sub>3</sub>CN  
Temp: room temp; 500 MHz

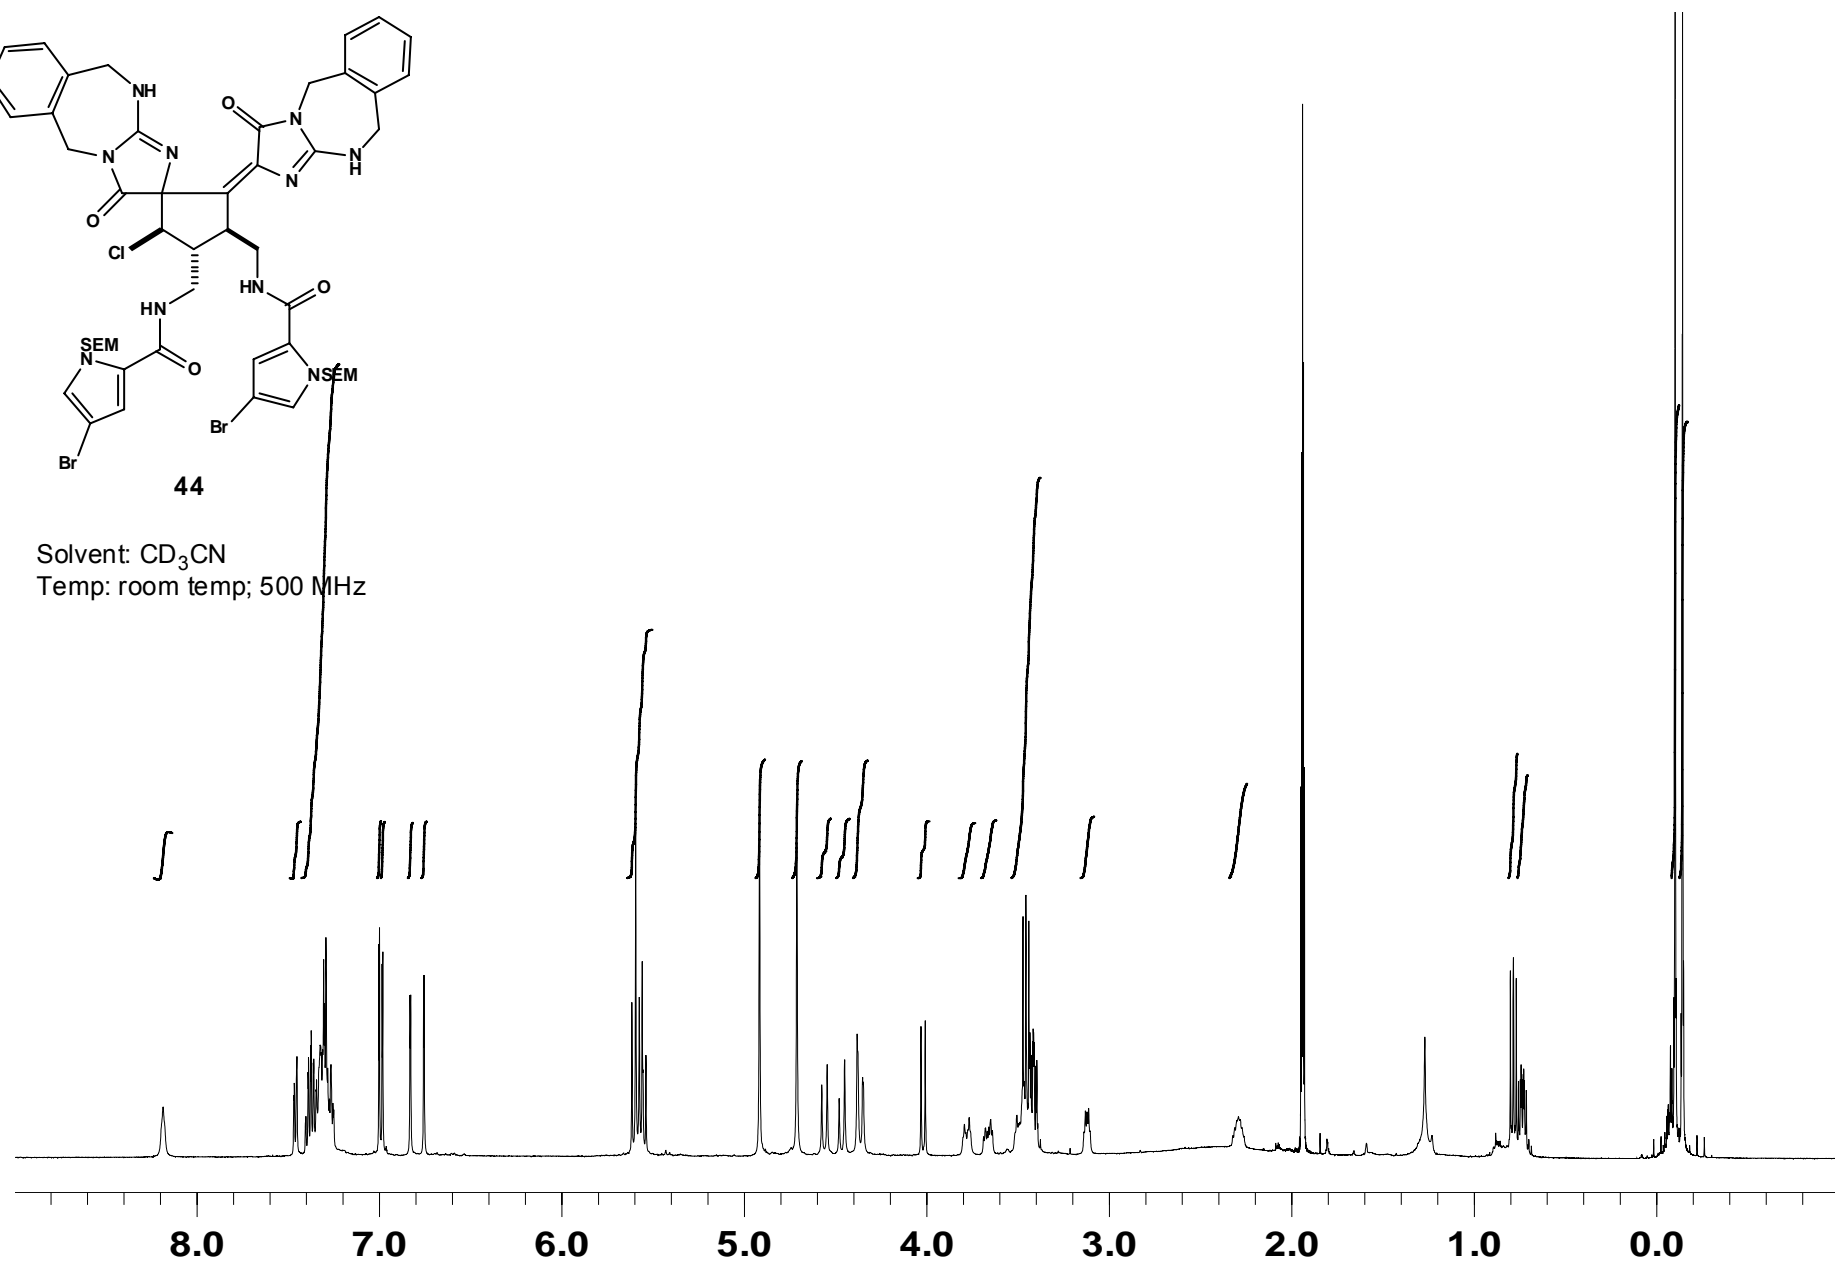

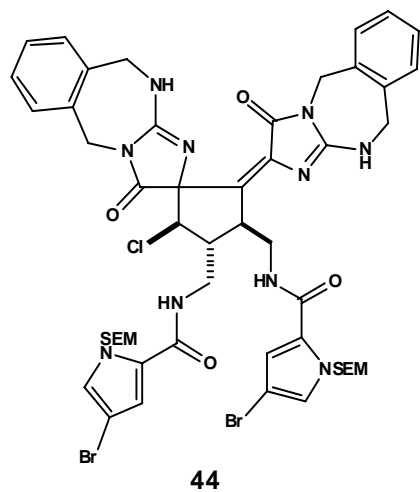

Solvent: CD<sub>3</sub>CN  
Temp: room temp; 125 MHz

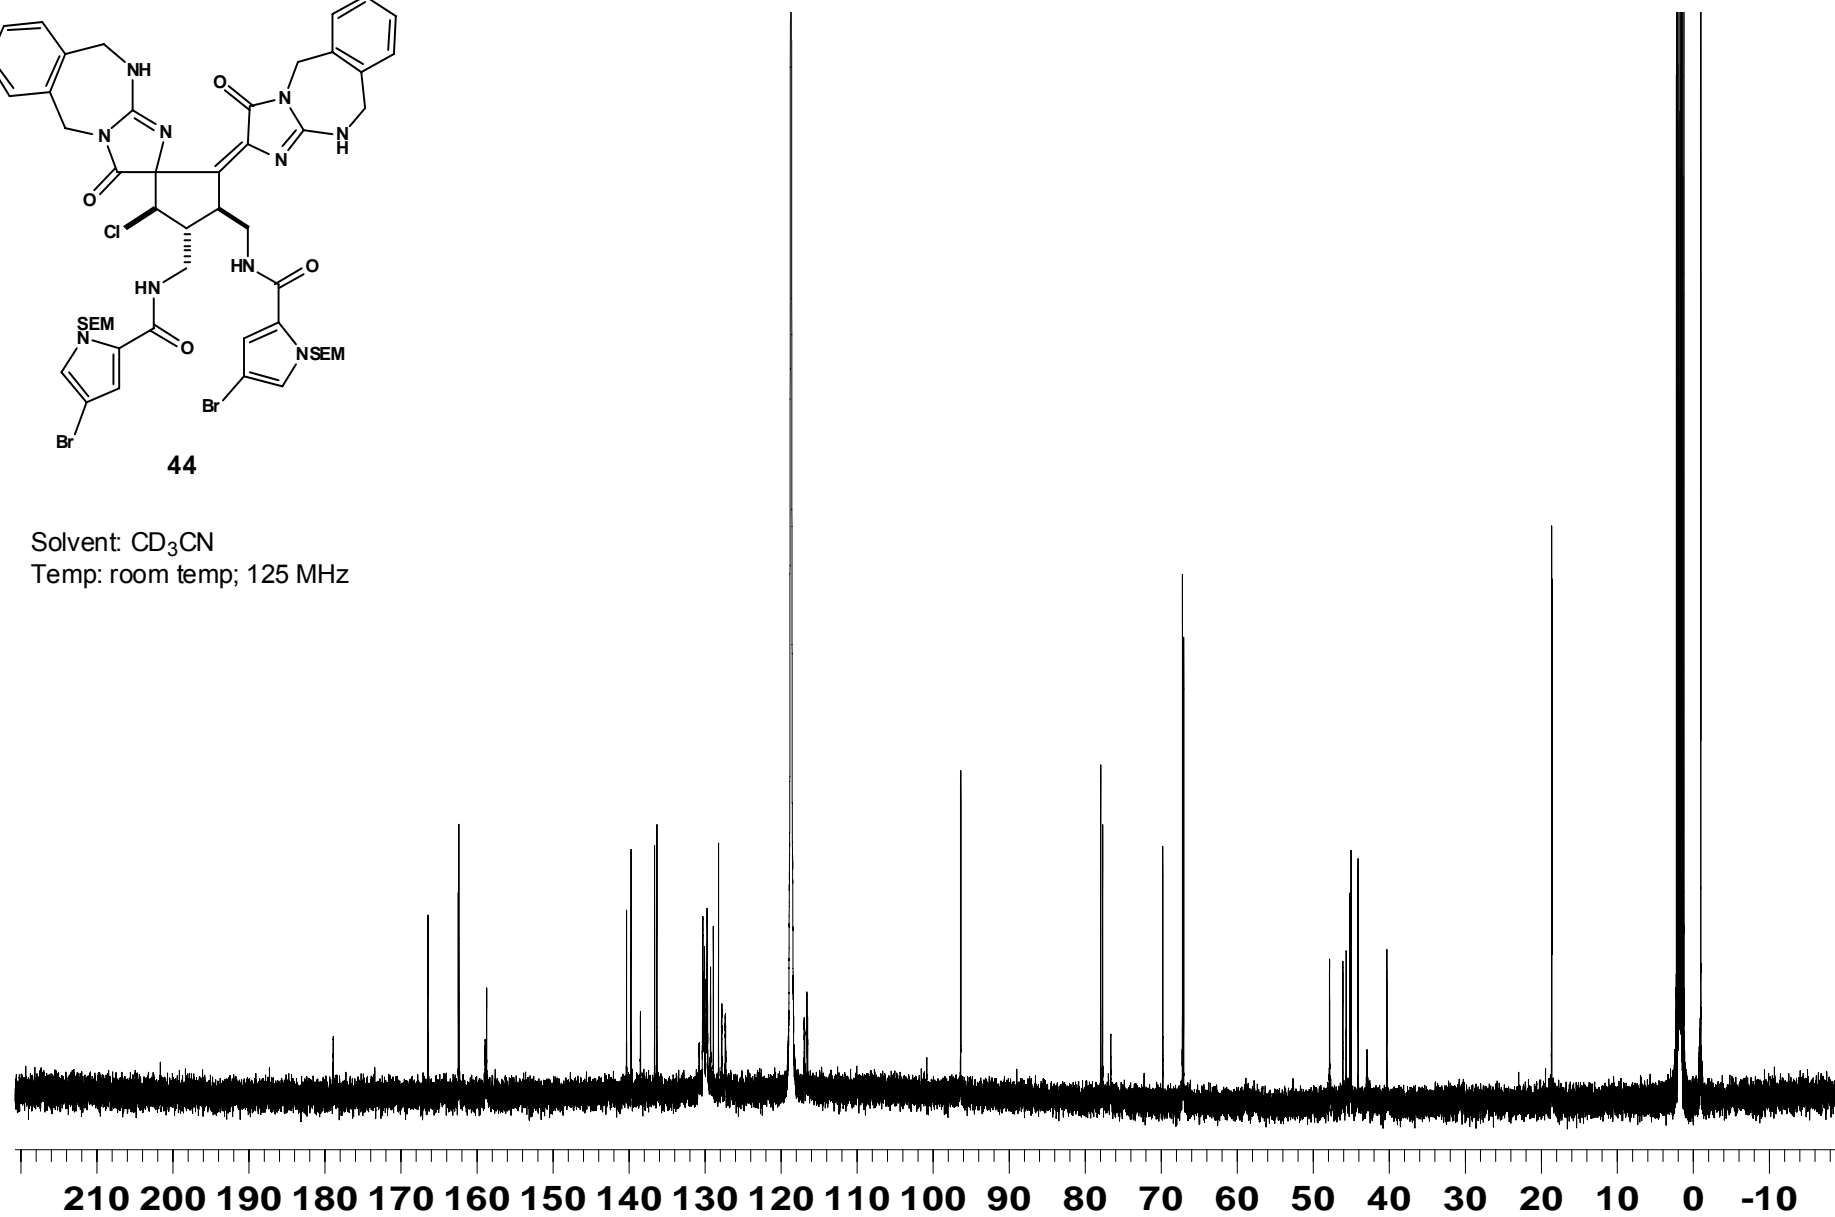

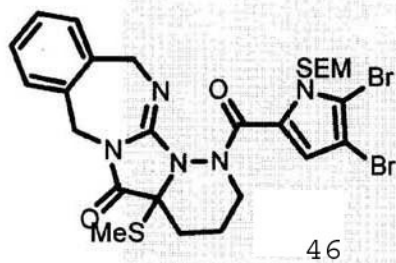

Solvent: CDCl<sub>3</sub>  
400 MHz

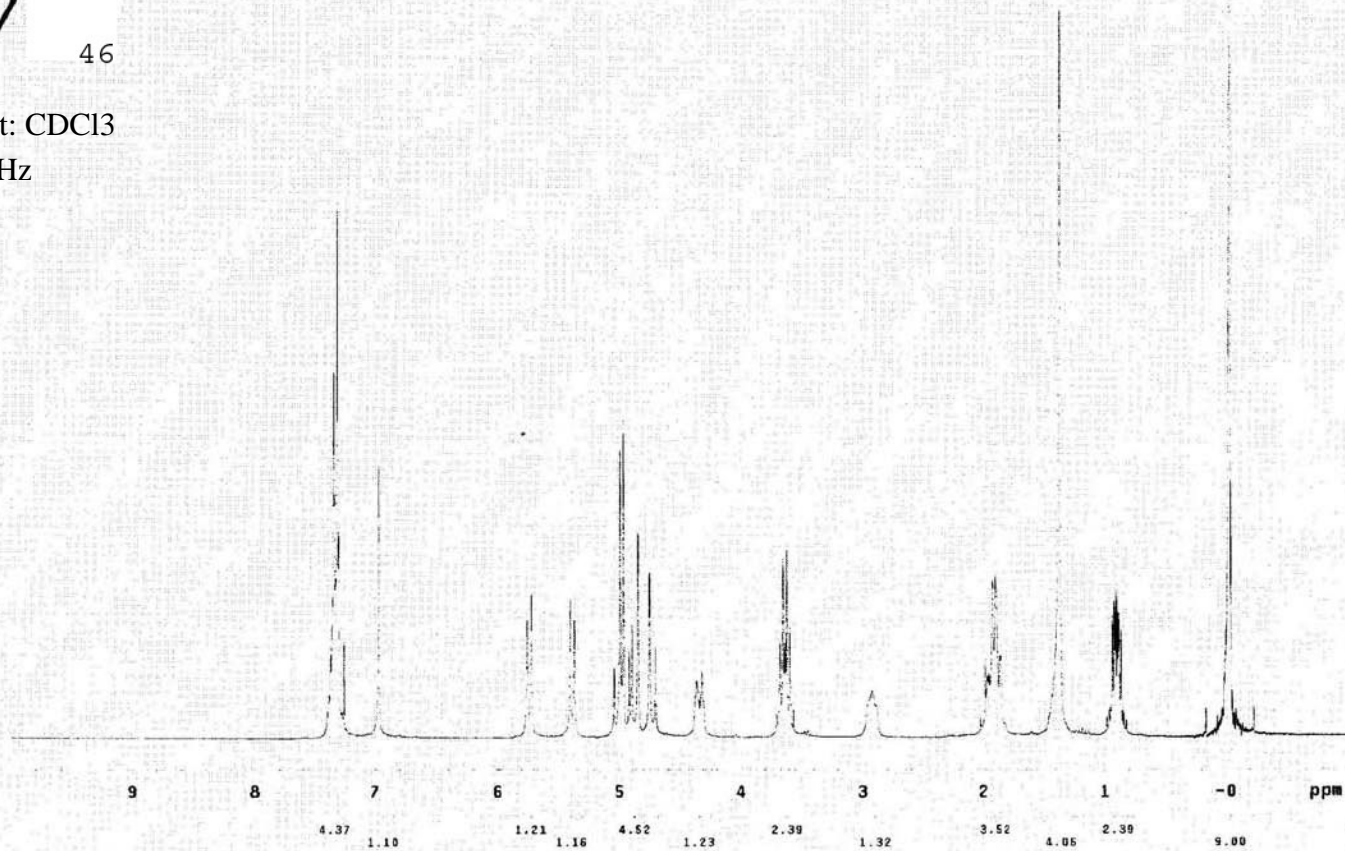

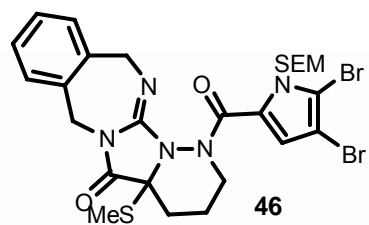

Solvent: CDCl<sub>3</sub>

100 MHz

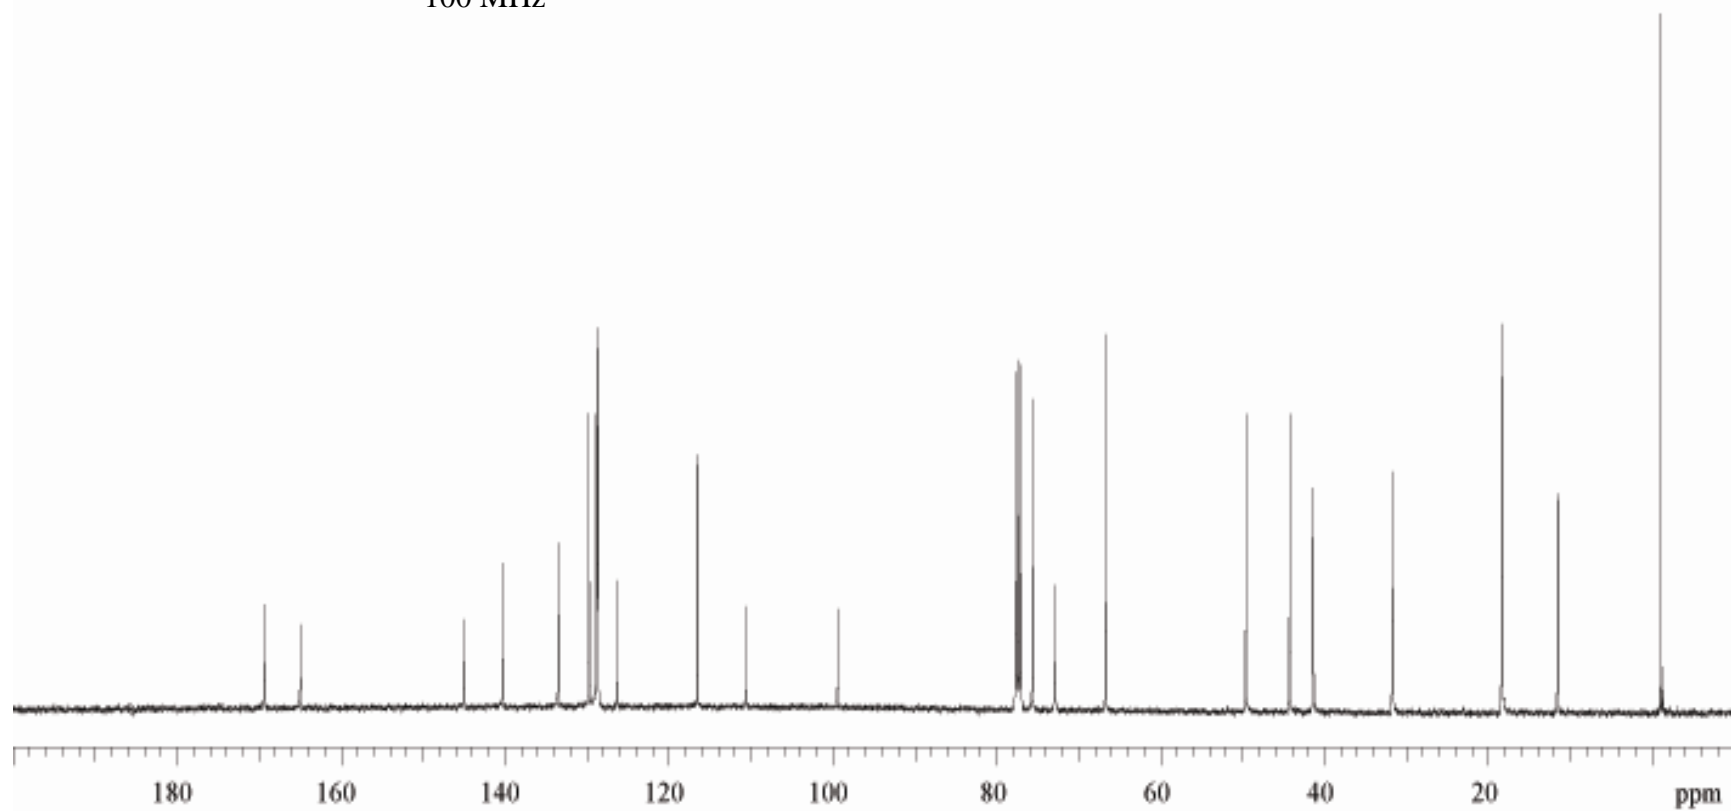

Supplement: Supplementary file 1 [file 4531222]
